# Supplementary material for: Metal-free visible light-induced cross-dehydrogenative coupling of benzocyclic imines with water/P(O)H compounds: efficient access to functionalized benzazepines/ones
Source: Royal Society of Chemistry journal article supplement (doi:10.1039/d3qo01609a), 2023-10-18
Supplement: d3qo01609a1.pdf [file d3qo01609a1.pdf]

## *Supplemental Information*

### **Metal-free visible-light-induced cross-dehydrogenative coupling of benzocyclic imines with water/P(O)H compounds : efficient access to functionalized benzazepines/ones**

Zhicheng Fu\*<sup>a</sup>, Luping Feng <sup>a</sup>, Yu Qin <sup>a</sup>, Xinhui Mu <sup>a</sup>, Xuqing Zhong <sup>a</sup>, Zhouyu Wang <sup>a</sup>, Ting Wang <sup>a</sup>, Jinni Deng <sup>a</sup>, Jingfang Li\*<sup>b</sup>, and Mingjun Chen\*<sup>a</sup>

*<sup>a</sup>Sichuan Provincial Key Laboratory of Asymmetric Synthesis and Chirality Technology, Department of Chemistry, College of Science, Xihua University, Chengdu 610039, P. R. China.*

*<sup>b</sup>School of Science, Chongqing University of Posts and Telecommunications, Chongqing 400065, P. R. China.*

\*Email: [cmjchem@126.com](mailto:cmjchem@126.com), [zcf@mail.xhu.edu.cn](mailto:zcf@mail.xhu.edu.cn)

## Table of Contents

|                                                                               |     |
|-------------------------------------------------------------------------------|-----|
| <b>1. General information</b> .....                                           | S3  |
| <b>2. Optimization of condition</b> .....                                     | S4  |
| Table S1 Reaction Conditions Optimizations for <b>3a</b> .....                | S4  |
| Table S2 Control experiment .....                                             | S5  |
| Table S3 Reaction Conditions Optimizations for <b>5aA</b> .....               | S5  |
| <b>3. General procedure for the preparation of benzocyclic imine 1</b> .....  | S6  |
| <b>4. Characterization data of compounds 1a-1o</b> .....                      | S6  |
| <b>5. General procedure for the synthesis of benzozepinones 3 and 5</b> ..... | S10 |
| Standard Procedure for <b>3</b> .....                                         | S10 |
| Standard Procedure for <b>5</b> .....                                         | S10 |
| <b>6. Characterization data of compounds 3 and 5</b> .....                    | S11 |
| <b>7. Scale up reaction and application</b> .....                             | S21 |
| 1) Scale up reaction of <b>3j</b> using continuous flow reactor .....         | S21 |
| 2) Synthetic transformations of <b>3j</b> .....                               | S22 |
| 3) Scale up reaction of <b>5qA</b> in continuous flow .....                   | S23 |
| 4) Flame retardancy of <b>5qA</b> in epoxy resin .....                        | S23 |
| <b>8. Mechanistic Investigation</b> .....                                     | S25 |
| Radical Trap Experiments .....                                                | S25 |
| Isotope labeling experiment .....                                             | S27 |
| The Light On-Off Experiment .....                                             | S29 |
| The EPR Experiment .....                                                      | S29 |
| <b>9. Supplemental References</b> .....                                       | S30 |
| <b>10. Copies of NMR Spectra of Compounds 1, 3 and 5</b> .....                | S31 |

## 1. General information

All reactions were carried out under inert atmospheres employing standard techniques unless otherwise noted. All reagents and materials were commercially available and used as received, unless otherwise noted. Diglycidyl ether of bisphenol A (DGEBA) with epoxy resin value of 0.44 mol/100 g was purchased from Nantong Xingchen Synthetic Material Co., Ltd., China. 4,4-diaminodiphenyl methane (DDM), 9,10-dihydro-9-oxa-10-phosphaphenanthrene-10-oxide (DOPO) were purchased from Titan Technology Co., Ltd., China. All solvent was in ultra-dry and anhydrous storage and its purity  $\geq 99.9\%$ .

The products were purified on column chromatography with silica gel (200–300 mesh). Thin-layer chromatography (TLC) separations were performed on silica gel GF254 plates with a mixture of petroleum ether (PE) and ethyl acetate (EA) as eluent, and the plates were visualized with UV light.  $^1\text{H}$  (400 MHz),  $^{13}\text{C}$  (101 MHz),  $^{19}\text{F}$  NMR (376 MHz), and  $^{31}\text{P}$  NMR (162 MHz) spectra were recorded on a Bruker AMX 400 NMR spectrometer with TMS as an internal standard in  $\text{CDCl}_3$  or  $\text{DMSO-d}_6$  solution. Chemical shifts for  $^1\text{H}$  NMR were reported in terms of chemical shift in reference to TMS at 0.00 ppm, residual  $\text{CHCl}_3$  at 7.26 ppm, or residual  $\text{DMSO-d}_6$  at 2.50 ppm ( $\delta$  ppm). The following abbreviations were used to illustrate the diversities:  $\delta$  = chemical shifts,  $J$  = coupling constant, s = singlet, brs = broad singlet, d = doublet, t = triplet, q = quartet, dd = doublet of doublets, dt = doublet of triplets, m = multiplet. Chemical shifts for  $^{13}\text{C}$  NMR are reported in terms of chemical shift in reference to the  $\text{CDCl}_3$  solvent signal (77.16 ppm, middle peak) and the  $\text{DMSO-d}_6$  solvent signal (39.50 ppm, middle peak).

RLR-18CF continuous flow photo reactor is supported by Beijing Bibby scientific Co., Ltd., China. Melting points were obtained on a Yanaco M500 melting point apparatus and are uncorrected. High resolution mass spectra were obtained via an Agilent LC/MSD TOF 6500 series mass spectrometer. According to GB/T 2406.2-2009 standard, the limiting oxygen index (LOI) values were evaluated using the JF-3 oxygen index instrument (Jiangning, China) with sample's dimension of 130 mm  $\times$  6.5 mm  $\times$  3.2 mm. The limiting oxygen index of each sample was the average of five parallel tests. According to GB/T 2408-2008 standard, the vertical burning (UL-94) tests were assessed using the CZF-3 instrument (Jiangning, China) with sample's dimension of 130 mm  $\times$  13 mm  $\times$  3.2 mm. The burning time of each sample was the average of five parallel tests.

## 2. Optimization of condition

**Table S1 Reaction Conditions Optimizations for 3a**

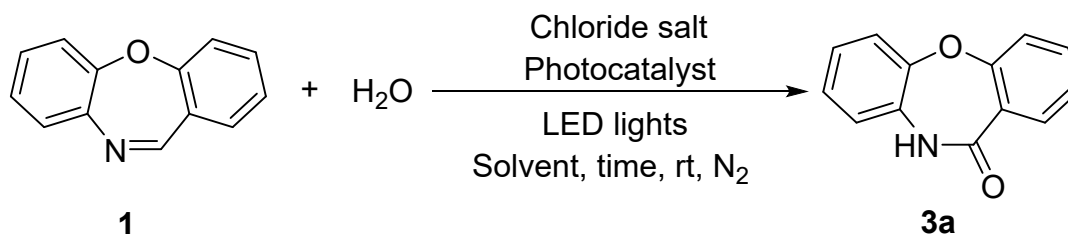

| entry | chloride salt                                      | photocatalyst                             | solvent            | LED lights    | time | 3a <sup>b</sup> |
|-------|----------------------------------------------------|-------------------------------------------|--------------------|---------------|------|-----------------|
| 1     | NaCl                                               | Ir(ppy) <sub>2</sub> (bpy)PF <sub>6</sub> | DCM                | 30W blue LEDs | 48   | 45%             |
| 2     | KCl                                                | Ir(ppy) <sub>2</sub> (bpy)PF <sub>6</sub> | DCM                | 30W blue LEDs | 48   | 38%             |
| 3     | LiCl                                               | Ir(ppy) <sub>2</sub> (bpy)PF <sub>6</sub> | DCM                | 30W blue LEDs | 48   | 10%             |
| 4     | MgCl <sub>2</sub>                                  | Ir(ppy) <sub>2</sub> (bpy)PF <sub>6</sub> | DCM                | 30W blue LEDs | 48   | 25%             |
| 5     | NiCl <sub>2</sub>                                  | Ir(ppy) <sub>2</sub> (bpy)PF <sub>6</sub> | DCM                | 30W blue LEDs | 48   | 35%             |
| 6     | (n-Bu) <sub>4</sub> N <sup>+</sup> Cl <sup>-</sup> | Ir(ppy) <sub>2</sub> (bpy)PF <sub>6</sub> | DCM                | 50W blue LEDs | 24   | 64%             |
| 7     | (n-Bu) <sub>4</sub> N <sup>+</sup> Cl <sup>-</sup> | 4CzTPN                                    | DCM                | 50W blue LEDs | 24   | 74%             |
| 8     | (n-Bu) <sub>4</sub> N <sup>+</sup> Cl <sup>-</sup> | 4CzIPN                                    | DCM                | 50W blue LEDs | 24   | 67%             |
| 9     | (n-Bu) <sub>4</sub> N <sup>+</sup> Cl <sup>-</sup> | Eosin-Y                                   | DCM                | 50W blue LEDs | 24   | 38%             |
| 10    | (n-Bu) <sub>4</sub> N <sup>+</sup> Cl <sup>-</sup> | 4CzTPN                                    | CH <sub>3</sub> CN | 50W blue LEDs | 24   | 98%             |
| 11    | (n-Bu) <sub>4</sub> N <sup>+</sup> Cl <sup>-</sup> | 4CzTPN                                    | CHCl <sub>3</sub>  | 50W blue LEDs | 24   | 64%             |
| 12    | (n-Bu) <sub>4</sub> N <sup>+</sup> Cl <sup>-</sup> | 4CzTPN                                    | DMF                | 50W blue LEDs | 24   | 5%              |
| 13    | (n-Bu) <sub>4</sub> N <sup>+</sup> Cl <sup>-</sup> | 4CzTPN                                    | PhCl               | 50W blue LEDs | 24   | 62%             |
| 14    | (n-Bu) <sub>4</sub> N <sup>+</sup> Cl <sup>-</sup> | 4CzTPN                                    | EtOH               | 50W blue LEDs | 24   | NR              |

<sup>a</sup>Conditions: **1a** (0.2 mmol), photocatalyst (1 mol %), HAT agents tetrabutyl ammonium chloride (0.5 equiv), and 10  $\mu$ L of water in solvent (2 mL) under a nitrogen atmosphere irradiation using blue LEDs at room temperature. <sup>b</sup>Isolated yields were shown.

**Table S2 Control experiment**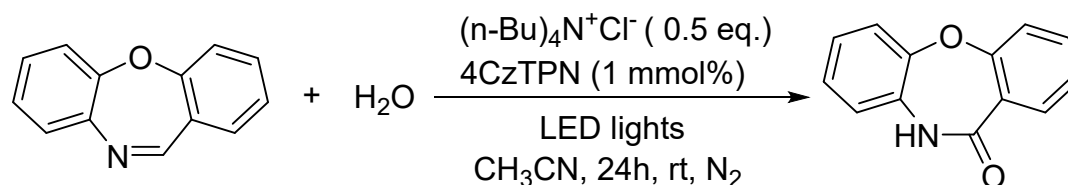

| entry          | Conditions <sup>a</sup>                   | <b>3a</b> <sup>b</sup> |
|----------------|-------------------------------------------|------------------------|
| 1              | No water                                  | trace                  |
| 2              | No $(n\text{-Bu})_4\text{N}^+\text{Cl}^-$ | 45%                    |
| 3              | No photocatalyst                          | trace                  |
| 4 <sup>c</sup> | No light                                  | N.D.                   |
| 5 <sup>c</sup> | No light, 60°C                            | N.D.                   |

<sup>a</sup>Conditions: **1a** (0.2 mmol), 4CzTPN (1 mol %), tetrabutyl ammonium chloride (0.5 equiv), and 10  $\mu\text{L}$  of water in  $\text{CH}_3\text{CN}$  (2 mL) under a nitrogen atmosphere irradiation using 50W blue LEDs at room temperature. <sup>b</sup>Isolated yields were shown. <sup>c</sup>N.D. = not detected.

**Table S3 Reaction Conditions Optimizations for 5aA**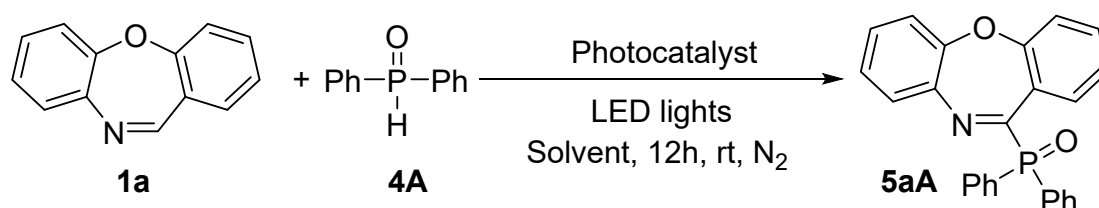

| entry          | photocatalyst                                    | solvent                | LED lights    | time | <b>3a</b> <sup>b</sup> |
|----------------|--------------------------------------------------|------------------------|---------------|------|------------------------|
| 1              | $\text{Ir}(\text{ppy})_2(\text{bpy})\text{PF}_6$ | DCM                    | 15W blue LEDs | 6    | 54%                    |
| 2              | 4CzTPN                                           | DCM                    | 15W blue LEDs | 6    | 58%                    |
| 3              | Eosin Y                                          | DCM                    | 15W blue LEDs | 6    | trace                  |
| 4 <sup>c</sup> | 4CzTPN                                           | $\text{CH}_3\text{CN}$ | 15W blue LEDs | 6    | N.D.                   |
| 5              | 4CzTPN                                           | THF                    | 15W blue LEDs | 6    | trace                  |
| 6              | 4CzTPN                                           | PhCl                   | 15W blue LEDs | 6    | trace                  |
| 7              | 4CzTPN                                           | DMF                    | 15W blue LEDs | 6    | trace                  |
| 8              | 4CzTPN                                           | DCM                    | 20W blue LEDs | 8    | 51%                    |
| 9              | 4CzTPN                                           | DCM                    | 50W blue LEDs | 12   | 76%                    |

<sup>a</sup> Conditions: the reaction was conducted on a 0.2 mmol scale. **1a** (0.2 mmol), **4a** (0.2 mmol), photocatalyst (5 mmol %) in solvent (2 mL) under a nitrogen atmosphere irradiation using LED lights at room temperature. <sup>b</sup> Isolated yields. <sup>c</sup> N.D. = not detected.

### 3. General procedure for the preparation of benzocyclic imine **1**

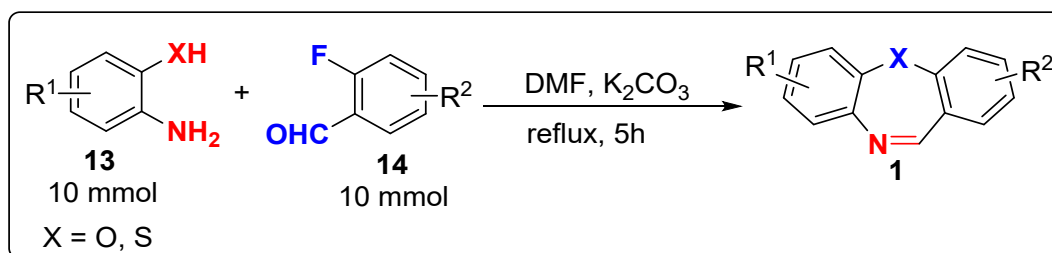

2-Aminophenol or 2-aminobenzenethiol **13** (10.0 mmol), 2-fluorobenzaldehyde **14** (10.0 mmol), and potassium carbonate (15.0 mmol, 2.07 g) were stirred in 20 mL DMF solvent and refluxed at 150 °C for 5 h. After cooled to room temperature, the reaction mixture were directly purified by column chromatography (petroleum ether/ethyl acetate = 100/1 to 5/1, v/v) to afford the desired product **1**.

### 4. Characterization data of compounds **1a-1o** [1,2,7]

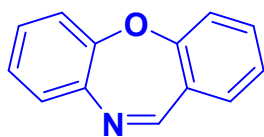

**dibenzo[b,f][1,4]oxazepine (1a)**. Lit.<sup>1</sup> Yellow solid (1.17 g, 60%). <sup>1</sup>H NMR (400 MHz, CDCl<sub>3</sub>): 8.52 (s, 1H), 7.44 (ddd, *J* = 8.1, 7.5, 1.7 Hz, 1H), 7.35 (ddd, *J* = 13.4, 7.6, 1.8 Hz, 2H), 7.27 – 7.10 (m, 5H). <sup>13</sup>C NMR (101 MHz, CDCl<sub>3</sub>): 160.8, 160.6, 152.8, 140.6, 133.5, 130.2, 129.3, 128.9, 127.5, 125.8, 125.2, 121.5, 120.8.

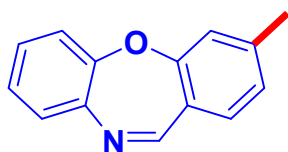

**3-methyldibenzo[b,f][1,4]oxazepine (1b)**. Lit.<sup>1</sup> Brown solid (1.8g, 88%). <sup>1</sup>H NMR (400 MHz, CDCl<sub>3</sub>): 8.47 (s, 1H), 7.36 (dd, *J* = 7.5, 1.9 Hz, 1H), 7.24 – 7.14 (m, 1H), 7.11 (dd, *J* = 7.7, 1.7 Hz, 1H), 7.01 (d, *J* = 7.8 Hz, 1H), 6.97 (s, 1H), 2.36 (s, 1H). <sup>13</sup>C NMR (101MHz, CDCl<sub>3</sub>): 160.8, 160.5, 152.8, 144.8, 140.7, 130.2, 129.3, 128.8, 125.9, 125.8, 124.8, 121.5, 121.3, 21.5.

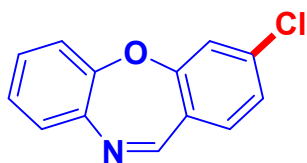

**3-chlorodibenzo[b,f][1,4]oxazepine (1c)**. Lit.<sup>1</sup> Yellow solid (0.79g,

34%).  $^1\text{H}$  NMR (400 MHz,  $\text{CDCl}_3$ ): 8.47 (s, 1H), 7.37 (dd,  $J = 7.5, 1.9$  Hz, 1H), 7.27 (d,  $J = 8.9$  Hz, 1H), 7.25 – 7.16 (m, 4H), 7.11 (dd,  $J = 7.7, 1.6$  Hz, 1H).  $^{13}\text{C}$  NMR (101 MHz,  $\text{CDCl}_3$ ): 160.9, 159.6, 152.4, 140.3, 139.3, 131.0, 129.5, 129.2, 126.2, 125.9, 125.6, 121.5, 121.5.

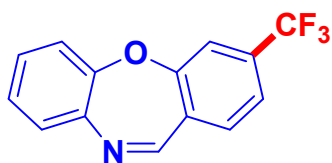

**3-(trifluoromethyl)dibenzo[b,f][1,4]oxazepine (1d).** Lit.<sup>1</sup> Yellow solid (1.1g, 44%).  $^1\text{H}$  NMR (400 MHz,  $\text{CDCl}_3$ ): 8.55 (s, 1H), 7.49 – 7.35 (m, 4H), 7.30 – 7.18 (m, 2H), 7.15 (dd,  $J = 7.8, 1.6$  Hz, 1H).  $^{13}\text{C}$  NMR (101 MHz,  $\text{CDCl}_3$ ): 160.5, 159.2, 152.3, 140.2, 135.0 (q,  $J_{\text{C-F}} = 33.3$  Hz), 130.7, 130.2, 129.6, 129.5, 126.3, 123.3 (q,  $J_{\text{C-F}} = 272.8$  Hz), 122.1 (q,  $J_{\text{C-F}} = 3.7$  Hz), 121.5, 118.3 (q,  $J_{\text{C-F}} = 3.7$  Hz).  $^{19}\text{F}$  NMR (376 MHz,  $\text{CDCl}_3$ ): -63.05.

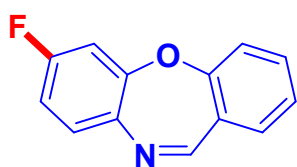

**7-fluorodibenzo[b,f][1,4]oxazepine (1e).** Lit.<sup>2</sup> . Yellow solid (1.9 g, 90%).  $^1\text{H}$  NMR (400 MHz,  $\text{CDCl}_3$ ): 8.47 (s, 1H), 7.37 (dd,  $J = 7.5, 1.9$  Hz, 1H), 7.27 (d,  $J = 8.9$  Hz, 1H), 7.25 – 7.15 (m, 4H), 7.11 (dd,  $J = 7.7, 1.6$  Hz, 1H).  $^{13}\text{C}$  NMR (101 MHz,  $\text{CDCl}_3$ ): 163.9, 161.4, 160.1 (d,  $J_{\text{C-F}} = 1.4$  Hz), 159.8, 153.2 (d,  $J_{\text{C-F}} = 11.3$  Hz), 137.1 (d,  $J_{\text{C-F}} = 3.7$  Hz), 133.6, 130.3 (t,  $J_{\text{C-F}} = 4.8$  Hz), 127.2, 125.6, 120.8, 112.8 (d,  $J_{\text{C-F}} = 21.9$  Hz), 109.1 (d,  $J_{\text{C-F}} = 24.2$  Hz).  $^{19}\text{F}$  NMR (376 MHz,  $\text{CDCl}_3$ ): 112.79.

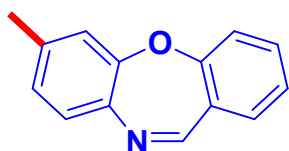

**7-methyldibenzo[b,f][1,4]oxazepine (1f).** Lit.<sup>1</sup> Yellow solid (0.96 g, 46%).  $^1\text{H}$  NMR (400 MHz,  $\text{CDCl}_3$ ): 8.47 (s, 1H), 7.44 (td,  $J = 7.8, 1.7$  Hz, 1H), 7.33 (dd,  $J = 7.6, 1.6$  Hz, 1H), 7.25 – 7.11 (m, 3H), 7.01 – 6.93 (m, 2H), 2.33 (s, 3H).  $^{13}\text{C}$  NMR (101 MHz,  $\text{CDCl}_3$ ): 160.4, 159.9, 152.4, 139.6, 138.0, 133.4, 130.2, 129.1, 127.5, 126.5, 125.1, 121.9, 120.8, 21.0.

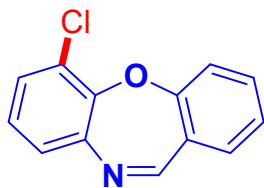

**6-chlorodibenzo[b,f][1,4]oxazepine (1g).** Lit.<sup>1</sup> Yellow solid (1.40 g, 61%).  $^1\text{H}$  NMR (400 MHz,  $\text{CDCl}_3$ ): 8.58 (s, 1H), 7.50 (td,  $J = 8.0, 1.5$  Hz, 1H), 7.39 – 7.34 (m, 2H), 7.33 – 7.27 (m, 2H), 7.24 (d,  $J = 7.5$  Hz, 1H), 7.10 (t,  $J = 8.0$  Hz, 1H).  $^{13}\text{C}$  NMR (101 MHz,  $\text{CDCl}_3$ ): 161.3, 156.0, 148.1, 142.0, 133.7, 130.0, 129.0, 127.5, 127.3, 126.7, 125.9, 125.7, 121.6.

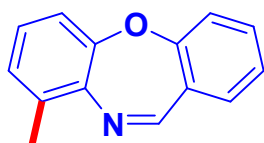

**9-methyldibenzo[b,f][1,4]oxazepine (1h).** Lit.<sup>1</sup> Yellow solid (1.04 mg, 50%).  $^1\text{H}$  NMR (400 MHz,  $\text{CDCl}_3$ ): 8.62 (s, 1H), 7.44 (td,  $J = 7.9, 1.6$  Hz, 1H), 7.35 (dd,  $J = 7.6, 1.6$  Hz, 1H), 7.20 (td,  $J = 7.5, 0.8$  Hz, 1H), 7.13 (dd,  $J = 16.5, 8.3$  Hz, 2H), 7.02 (dd,  $J = 18.5, 7.6$

Hz, 2H), 2.43 (s, 3H).  $^{13}\text{C}$  NMR (101 MHz,  $\text{CDCl}_3$ ): 160.7, 160.7, 150.6, 140.1, 135.5, 133.4, 130.2, 129.6, 129.5, 127.4, 125.1, 121.1, 120.7, 20.7.

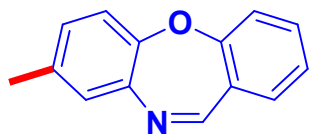

**8-methyldibenzo[b,f][1,4]oxazepine (1i).** Lit.<sup>1</sup> Yellow solid (0.83 g, 40%).  $^1\text{H}$  NMR (400 MHz,  $\text{CDCl}_3$ ): 8.51 (s, 1H), 7.44 (td,  $J = 8.0, 1.7$  Hz, 1H), 7.33 (dd,  $J = 7.6, 1.6$  Hz, 1H), 7.22 – 7.09 (m, 3H), 7.02 (s, 2H), 2.31 (s, 3H).  $^{13}\text{C}$  NMR (101 MHz,  $\text{CDCl}_3$ ): 160.7, 160.7, 150.6, 140.1, 135.5, 133.4, 130.2, 129.6, 129.5, 127.4, 125.1, 121.1, 120.7, 20.7.

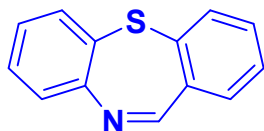

**dibenzo[b,f][1,4]thiazepine (1j).** Lit.<sup>1</sup> White solid (1.68 mg, 80%).  $^1\text{H}$  NMR (400 MHz,  $\text{CDCl}_3$ ): 8.90 (s, 1H), 7.47 – 7.30 (m, 7H), 7.21 – 7.13 (m, 1H).  $^{13}\text{C}$  NMR (101 MHz,  $\text{CDCl}_3$ ): 162.3, 148.6, 139.4, 137.3, 132.8, 131.7, 131.5, 129.5, 129.3, 128.9, 128.3, 127.3, 126.9.

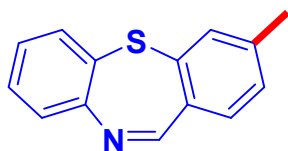

**3-methyldibenzo[b,f][1,4]thiazepine (1k).** Lit.<sup>2</sup> Yellow solid (1.8 g, 80%).  $^1\text{H}$  NMR (400 MHz,  $\text{CDCl}_3$ ): 8.68 (s, 1H), 7.24 (dd,  $J = 7.8, 1.1$  Hz, 1H), 7.19 – 7.10 (m, 2H), 7.07 – 7.03 (m, 2H), 6.95 (ddd,  $J = 17.5, 11.7, 4.8$  Hz, 2H), 2.12 (s, 3H).  $^{13}\text{C}$  NMR (101 MHz,  $\text{CDCl}_3$ ): 162.1, 148.6, 142.1, 138.9, 134.4, 132.6, 131.9, 129.3, 129.1, 128.8, 128.7, 126.9, 126.85, 21.0.

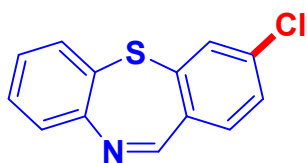

**3-chlorodibenzo[b,f][1,4]thiazepine (1l).** Lit.<sup>1</sup> Brown solid (2.3 g, 93%).  $^1\text{H}$  NMR (400 MHz,  $\text{CDCl}_3$ ): 8.75 (s, 1H), 7.37 – 7.30 (m, 2H), 7.28 – 7.20 (m, 4H), 7.12 – 7.07 (m, 1H).  $^{13}\text{C}$  NMR (101 MHz,  $\text{CDCl}_3$ ): 161.2, 148.5, 141.0, 137.8, 135.6, 133.0, 131.5, 130.4, 129.7, 128.6, 128.1, 127.6, 127.1.  $^{19}\text{F}$  NMR (376 MHz,  $\text{CDCl}_3$ ): -62.96.

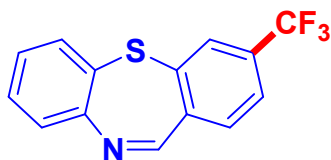

**3-(trifluoromethyl)dibenzo[b,f][1,4]thiazepine (1m).** Lit.<sup>1</sup> Yellow solid (2.4 g, 85%).  $^1\text{H}$  NMR (400 MHz,  $\text{CDCl}_3$ ): 8.80 (s, 1H), 7.58 (s, 1H), 7.47 (dd,  $J = 8.0, 0.9$  Hz, 1H), 7.38 (d,  $J = 8.0$  Hz, 1H), 7.34 – 7.30 (m, 1H), 7.27 – 7.19 (m, 2H), 7.08 (ddd,  $J = 7.9, 6.7, 2.2$  Hz, 1H).  $^{13}\text{C}$  NMR (101 MHz,  $\text{CDCl}_3$ ): 160.9, 148.4, 140.6, 140.1, 133.3 (q,  $J_{\text{C-F}} = 33.2$  Hz), 133.0, 129.8, 129.7, 128.6 (q,  $J_{\text{C-F}} = 3.7$  Hz), 127.9, 127.8, 127.2, 125.3 (q,  $J_{\text{C-F}} = 3.7$  Hz), 123.40 (q,  $J_{\text{C-F}} = 272.9$  Hz).



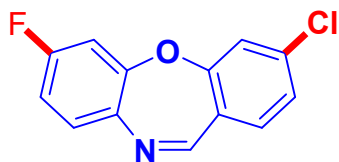

**3-chloro-7-fluorodibenzo[b,f][1,4]oxazepine (1n).** Lit.<sup>2</sup> Yellow solid (1.8 g, 76%). <sup>1</sup>H NMR (400 MHz, CDCl<sub>3</sub>): 8.40 (s, 1H), 7.33 (dd, *J* = 8.8, 6.2 Hz, 1H), 7.28 (d, *J* = 2.6 Hz, 1H), 7.22 (dd, *J* = 8.2, 1.9 Hz, 1H), 7.15 (d, *J* = 1.8 Hz, 1H), 6.92 (ddd, *J* = 8.8, 7.7, 2.8 Hz, 1H), 6.84 (dd, *J* = 8.7, 2.8 Hz, 1H). <sup>13</sup>C NMR (101 MHz, CDCl<sub>3</sub>): 162.7 (d, *J*<sub>C-F</sub> = 250.0 Hz), 159.9, 158.7 (d, *J*<sub>C-F</sub> = 1.7 Hz), 152.6 (d, *J*<sub>C-F</sub> = 11.1 Hz), 139.2, 136.9 (d, *J*<sub>C-F</sub> = 3.7 Hz), 130.9, 130.5 (d, *J*<sub>C-F</sub> = 9.9 Hz), 125.9, 125.7, 121.4, 113.1 (d, *J*<sub>C-F</sub> = 22.0 Hz), 109.1 (d, *J*<sub>C-F</sub> = 24.4 Hz).

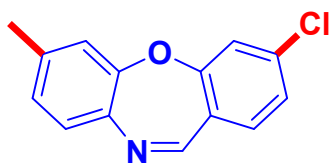

**3-chloro-7-methyldibenzo[b,f][1,4]oxazepine (1o).** Lit.<sup>2</sup> White solid (1.2g, 89%). <sup>1</sup>H NMR (400 MHz, CDCl<sub>3</sub>): 8.33 (s, 1H), 7.19 – 7.15 (m, 2H), 7.12 – 7.06 (m, 2H), 6.92 (dd, *J* = 8.0, 1.2 Hz, 1H), 6.84 (d, *J* = 1.2 Hz, 1H), 2.25 (s, 3H). <sup>13</sup>C NMR (101 MHz, CDCl<sub>3</sub>): 160.65, 158.7, 151.9, 139.9, 138.9, 137.9, 130.9, 129.3, 126.8, 126.1, 125.5, 121.9, 121.5, 20.9.

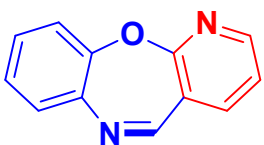

**benzo[b]pyrido[3,2-f][1,4]oxazepine (1p).** Lit.<sup>7</sup> Yellow solid (0.36g, 37%). <sup>1</sup>H NMR (400 MHz, CDCl<sub>3</sub>): 8.43 (s, 1H), 8.39 (dd, *J* = 4.9, 1.9 Hz, 1H), 7.75 (dd, *J* = 7.5, 2.0 Hz, 1H), 7.38 (d, *J* = 7.6 Hz, 1H), 7.30 – 7.27 (m, 2H), 7.25 – 7.19 (m, 2H). <sup>13</sup>C NMR (101 MHz, CDCl<sub>3</sub>): 163.8, 157.8, 151.6, 150.6, 140.0, 139.5, 129.7, 129.4, 126.3, 122.4, 121.8, 121.7.

## 5. General procedure for the synthesis of benzozepinones **3** and **5**

### Standard Procedure for **3**

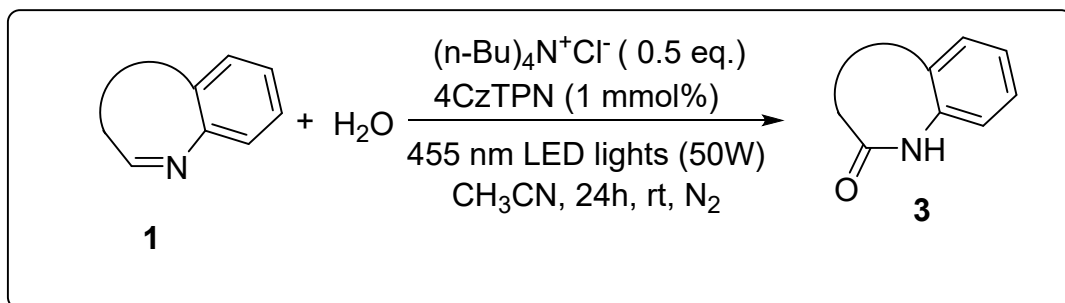

Benzocyclic imine **1** (0.2 mmol), 4CzTPN (1.6 mg, 0.002 mmol, 1 mmol%), and tetrabutyl ammonium chloride (27.8 mg, 0.1 mmol) were placed in 10 mL Schlenk tube equipped with a magnetic stir bar. After back-filled with nitrogen (this process was repeated three times), water (10  $\mu\text{L}$ ) and  $\text{CH}_3\text{CN}$  (2.0 mL) was added, the vial was sealed and exposed to blue LEDs (50 W LED light) at room temperature for 12 h. The reaction mixture was diluted with  $\text{H}_2\text{O}$  (15 mL) and washed with dichloromethane (3 x 10 mL). The organic phase was dried over anhydrous sodium sulfate and purified directly by column chromatography to afford the product **3**.

### Standard Procedure for **5**

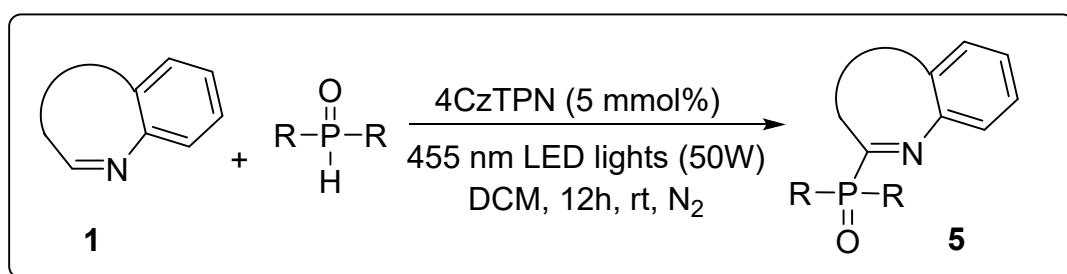

Benzocyclic imine **1** (0.2 mmol), 4CzTPN (8.0 mg, 0.010 mmol, 5 mmol%), and  $\text{P}(\text{O})\text{H}$  compound (0.2 mmol) were placed in 10 mL Schlenk tube equipped with a magnetic stir bar. After back-filled with nitrogen (this process was repeated three times), DCM (2.0 mL) was added, the vial was sealed and exposed to blue LEDs (50 W LED light) at room temperature for 12 h. The reaction mixture was diluted with  $\text{H}_2\text{O}$  (15 mL) and washed with dichloromethane (3 x 10 mL). The organic phase was dried over anhydrous sodium sulfate and purified directly by column chromatography to afford the product **5**.

## 6. Characterization data of compounds 3 and 5 [3-6]

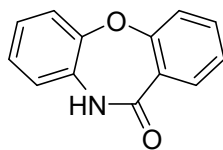

**dibenzo[*b,f*][1,4]oxazepin-11(10H)-one (3a).** lit<sup>5</sup>. White solid. M.p.: 118-120 °C, 41mg, 98% yield. <sup>1</sup>H NMR (400 MHz, CDCl<sub>3</sub>): 7.48 (s, 1H), 6.76 – 6.66 (m, 1H), 6.32 – 6.21 (m, 1H), 6.05 – 5.96 (m, 3H), 5.94 – 5.80 (m, 3H). <sup>13</sup>C NMR (101 MHz, CDCl<sub>3</sub>): 167.8, 159.8, 151.0, 134.6, 132.1, 130.7, 125.9, 125.3, 121.8, 121.4, 120.9. HRMS (ESI) calcd. for C<sub>13</sub>H<sub>10</sub>NO<sub>2</sub><sup>+</sup> (M + H<sup>+</sup>) *m/z* 212.0707, found 212.0704.

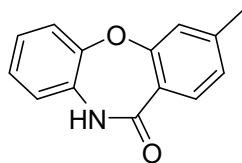

**3-methyldibenzo[*b,f*][1,4]oxazepin-11(10H)-one (3b).** White solid. M.p.: 138-140 °C, 23mg, 57% yield. <sup>1</sup>H NMR (400 MHz, CDCl<sub>3</sub>): 8.95 (s, 1H), 8.01 (d, *J* = 8.3 Hz, 1H), 7.45 – 7.39 (m, 1H), 7.33 – 7.19 (m, 5H), 2.56 (s, 3H). <sup>13</sup>C NMR (101 MHz, CDCl<sub>3</sub>): 158.7, 149.9, 144.9, 130.9, 129.9, 125.2, 124.9, 124.8, 121.3, 120.8, 120.4, 120.3, 20.5. HRMS (ESI) calcd. for C<sub>14</sub>H<sub>12</sub>NO<sub>2</sub><sup>+</sup> (M + H<sup>+</sup>) *m/z* 226.0863, found 226.0863.

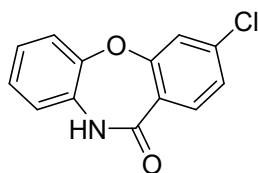

**3-chlorodibenzo[*b,f*][1,4]oxazepin-11(10H)-one (3c).** Yellow oil. 42mg, 86% yield. <sup>1</sup>H NMR (400 MHz, DMSO): 10.61 (s, 1H), 7.78 (d, *J* = 8.4 Hz, 1H), 7.55 (d, *J* = 2.0 Hz, 1H), 7.42 – 7.34 (m, 2H), 7.23 – 7.12 (m, 3H). <sup>13</sup>C NMR (101 MHz, DMSO): 164.8, 159.2, 149.9, 138.1, 132.9, 130.9, 126.3, 125.8, 125.4, 124.7, 121.7, 121.4, 120.9. HRMS (ESI) calcd. for C<sub>13</sub>H<sub>9</sub>ClNO<sub>2</sub><sup>+</sup> (M + H<sup>+</sup>) *m/z* 246.0316, found 246.0318.

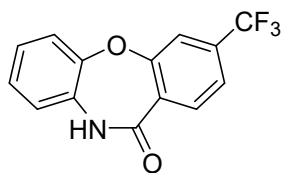

**3-(trifluoromethyl)dibenzo[*b,f*][1,4]oxazepin-11(10H)-one (3d).** White solid, M.p: 181-182 °C, 23mg, 41% yield for 24 h (54% yield for 48 h). <sup>1</sup>H NMR (400 MHz, CDCl<sub>3</sub>): 9.16 (s, 1H), 8.08 (d, *J* = 7.8 Hz, 1H), 7.51 (d, *J* = 8.2 Hz, 2H), 7.30 (dd, *J* = 7.4, 1.9 Hz, 1H), 7.22 – 7.12 (m, 3H). <sup>13</sup>C NMR (101 MHz, DMSO): 1, 158.9, 150.1, 133.9 (q, *J*<sub>C-F</sub> = 32.6 Hz), 132.9, 130.7, 129.6, 126.4, 125.5, 123.1 (q, *J*<sub>C-F</sub> = 272.8 Hz), 122.1 (q, *J*<sub>C-F</sub> = 3.6 Hz), 121.9, 121.5, 118.1 (q, *J*<sub>C-F</sub> = 3.5 Hz). HRMS (ESI) calcd. for C<sub>14</sub>H<sub>9</sub>F<sub>3</sub>NO<sub>2</sub><sup>+</sup> (M + H<sup>+</sup>) *m/z* 280.0580, found 280.0582.

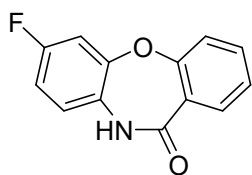

**7-fluorodibenzo[*b,f*][1,4]oxazepin-11(10H)-one (3e).** White solid, M.p.:

204 - 206 °C. 26 mg, 57% yield.  $^{19}\text{F}$ -NMR (69Hz,  $\text{CDCl}_3$ ) = 115.5.  $^1\text{H}$  NMR (400 MHz,  $\text{CDCl}_3$ ): 8.16 (s, 1H), 7.87 (dd,  $J = 7.8, 1.7$  Hz, 1H), 7.47 (td,  $J = 8.0, 1.6$  Hz, 1H), 7.24 – 7.20 (m, 1H), 7.17 – 7.13 (m, 2H), 6.94 (dt,  $J = 8.5, 4.0$  Hz, 2H), 6.85 – 6.77 (m, 1H).  $^{13}\text{C}$  NMR (101 MHz,  $\text{CDCl}_3$ ): 170.6, 163.7, 163.9 (d,  $J_{\text{C-F}} = 243.1$  Hz), 156.2 (d,  $J_{\text{C-F}} = 11.3$  Hz), 138.1 (d,  $J_{\text{C-F}} = 300.9$  Hz), 133.1 (d,  $J_{\text{C-F}} = 3.4$  Hz), 130.9, 130.7, 127.7 (d,  $J_{\text{C-F}} = 9.7$  Hz), 125.8, 117.9 (d,  $J_{\text{C-F}} = 22.4$  Hz), 114.1 (d,  $J_{\text{C-F}} = 24.6$  Hz), 84.2 (t,  $J_{\text{C-F}} = 33.2$  Hz). HRMS (ESI) calcd. for  $\text{C}_{13}\text{H}_9\text{FNO}_2^+$  ( $\text{M} + \text{H}^+$ )  $m/z$  230.0612, found 230.0614.

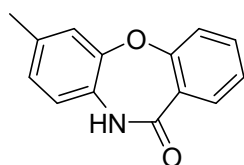

**7-methyldibenzo[*b,f*][1,4]oxazepin-11(10H)-one (3f).** White solid. M.p.:

170-175°C, 27mg, 61% yield.  $^1\text{H}$  NMR (400 MHz,  $\text{CDCl}_3$ ): 8.57 (s, 1H), 7.94 (dd,  $J = 7.7, 1.5$  Hz, 1H), 7.51 (td,  $J = 7.8, 1.7$  Hz, 1H), 7.30 – 7.19 (m, 2H), 7.08 (s, 1H), 7.00 – 6.89 (m, 2H), 2.32 (s, 3H).  $^{13}\text{C}$  NMR (101 MHz,  $\text{CDCl}_3$ ): 167.5, 159.8, 151.0, 136.3, 134.5, 132.1, 128.0, 126.6, 125.3, 122.2, 121.1, 120.9, 20.8. HRMS (ESI) calcd. for  $\text{C}_{14}\text{H}_{12}\text{NO}_2^+$  ( $\text{M} + \text{H}^+$ )  $m/z$  226.0863, found 226.0863.

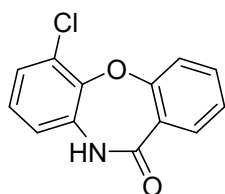

**6-chlorodibenzo[*b,f*][1,4]oxazepin-11(10H)-one (3g).** White solid. M.p.:

225-226°C, 38mg, 77% yield.  $^1\text{H}$  NMR (400 MHz,  $\text{CDCl}_3$ ) 8.45 (s, 1H), 7.94 (d,  $J = 5.8$  Hz, 1H), 7.75 – 7.39 (m, 3H), 7.16 – 6.89 (m, 2H).  $^{13}\text{C}$  NMR (101 MHz, DMSO): 159.9, 152.7, 140.3, 129.1, 127.6, 126.0, 121.0, 120.5, 120.2, 120.1, 119.8, 115.3, 115.0. HRMS (ESI) calcd. for  $\text{C}_{13}\text{H}_9\text{ClNO}_2^+$  ( $\text{M} + \text{H}^+$ )  $m/z$  246.0317, found 246.0318.

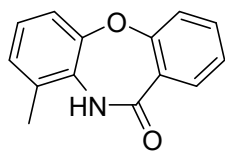

**9-methyldibenzo[*b,f*][1,4]oxazepin-11(10H)-one (trans:cis = 58:42) (3h).**

Yellow oil, 31mg, 69% yield.  $^1\text{H}$  NMR (400 MHz,  $\text{CDCl}_3$ ): 8.62 (s, 1H), 7.91 (dd,  $J = 7.6, 1.4$  Hz, 1H), 7.75 (s, 1H), 7.51 (td,  $J = 7.8, 1.7$  Hz, 1H), 7.44 (td,  $J = 8.0, 1.6$  Hz, 1H), 7.36 (dd,  $J = 7.6, 1.5$  Hz, 1H), 7.25 – 7.17 (m, 3H), 7.17 – 7.07 (m, 3H), 7.06 – 6.96 (m, 4H), 2.42 (s, 3H), 2.36 (s, 3H).  $^{13}\text{C}$  NMR (101 MHz,  $\text{CDCl}_3$ ): 167.0, 156.0, 151.8, 134.6, 131.9, 129.5, 129.2, 127.6, 125.7, 125.5, 125.4, 120.9, 119.6, 17.9. HRMS (ESI) calcd. for  $\text{C}_{14}\text{H}_{12}\text{NO}_2^+$  ( $\text{M} + \text{H}^+$ )  $m/z$  226.0863, found 226.0863.

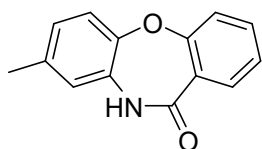

**8-methyldibenzo[*b,f*][1,4]oxazepin-11(10H)-one (3i).** Yellow oil, 37mg, 82% yield. <sup>1</sup>H NMR (400 MHz, CDCl<sub>3</sub>): 9.25 (s, 1H), 7.95 (dd, *J* = 7.7, 1.5 Hz, 1H), 7.51 (td, *J* = 7.9, 1.7 Hz, 1H), 7.23 (d, *J* = 8.6 Hz, 2H), 7.14 (d, *J* = 8.1 Hz, 1H), 6.96 – 6.88 (m, 2H), 2.30 (s, 3H). <sup>13</sup>C NMR (101 MHz, CDCl<sub>3</sub>): 167.8, 156.0, 149.0, 136.0, 134.5, 132.1, 130.3, 126.5, 125.3, 125.2, 121.8, 121.4, 120.9, 20.9. HRMS (ESI) calcd. for C<sub>14</sub>H<sub>12</sub>NO<sub>2</sub><sup>+</sup> (*M* + *H*<sup>+</sup>) *m/z* 226.0863, found 226.0863.

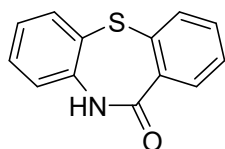

**dibenzo[*b,f*][1,4]thiazepin-11(10H)-one (3j).** White solid. M.p.: 202 – 205°C. 44mg, 96% yield. <sup>1</sup>H NMR (400 MHz, CDCl<sub>3</sub>): 8.76 (s, 1H), 7.85 (d, *J* = 7.0 Hz, 1H), 7.54 (dd, *J* = 24.0, 7.4 Hz, 2H), 7.45 – 7.33 (m, 2H), 7.33 – 7.27 (m, 1H), 7.22 – 7.09 (m, 2H). <sup>13</sup>C NMR (101 MHz, CDCl<sub>3</sub>): 169.8, 139.4, 137.5, 137.0, 133.2, 132.4, 132.0, 131.99, 130.4, 129.9, 128.9, 126.2, 122.7. HRMS (ESI) calcd. for C<sub>13</sub>H<sub>10</sub>NOS<sup>+</sup> (*M* + *H*<sup>+</sup>) *m/z* 228.0478, found 228.0492.

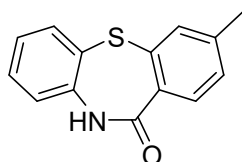

**3-methyldibenzo[*b,f*][1,4]thiazepin-11(10H)-one (3k).** White solid. M.p. 320-321 °C, 29mg, 58% yield. <sup>1</sup>H NMR (400 MHz, DMSO): 10.60 (s, 1H), 7.58 (d, *J* = 7.9 Hz, 1H), 7.54 (dd, *J* = 7.7, 1.4 Hz, 1H), 7.38 – 7.32 (m, 2H), 7.23 (td, *J* = 8.1, 1.1 Hz, 2H), 7.13 (td, *J* = 7.5, 1.4 Hz, 1H), 2.30 (s, 3H). <sup>13</sup>C NMR (101 MHz, DMSO): 167.9, 141.9, 139.5, 135.5, 134.4, 131.9, 131.2, 130.8, 129.3, 129.0, 128.3, 124.8, 122.6, 20.0. HRMS (ESI) calcd. for C<sub>14</sub>H<sub>12</sub>NOS<sup>+</sup> (*M* + *H*<sup>+</sup>) *m/z* 242.0634, found 242.0640.

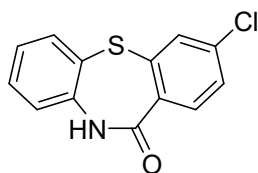

**3-chlorodibenzo[*b,f*][1,4]thiazepin-11(10H)-one (3l).** White solid. M.p. 104-106 °C, 48mg, 92% yield. <sup>1</sup>H NMR (400 MHz, DMSO): 10.77 (s, 1H), 7.68 (d, *J* = 8.4 Hz, 1H), 7.61 (d, *J* = 2.1 Hz, 1H), 7.56 (dd, *J* = 7.7, 1.3 Hz, 1H), 7.50 (dd, *J* = 8.4, 2.1 Hz, 1H), 7.38 (td, *J* = 7.9, 1.5 Hz, 1H), 7.24 (dd, *J* = 8.0, 1.1 Hz, 1H), 7.16 (td, *J* = 7.6, 1.3 Hz, 1H). <sup>13</sup>C NMR (101 MHz, CDCl<sub>3</sub>): 171.9, 144.3, 142.6, 141.0, 140.7, 137.4, 137.2, 135.1, 134.6, 133.5, 132.7, 130.1, 127.8. HRMS (ESI) calcd. for C<sub>13</sub>H<sub>9</sub>ClNOS<sup>+</sup> (*M* + *H*<sup>+</sup>) *m/z* 262.0688, found 242.0698.

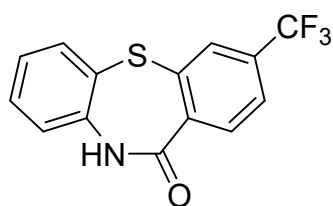

**3-(trifluoromethyl)dibenzo[*b,f*][1,4]thiazepin-11(10H)-one (3m)**  
White solid. M.p. 207-209 °C. 34mg, 58% yield. <sup>1</sup>H NMR (400 MHz, CDCl<sub>3</sub>): 9.03 (s, 1H), 7.95

(d,  $J = 8.1$  Hz, 1H), 7.79 (s, 1H), 7.60 (dd,  $J = 11.0, 4.0$  Hz, 2H), 7.35 (td,  $J = 8.0, 1.1$  Hz, 1H), 7.24 – 7.14 (m, 2H).  $^{13}\text{C}$  NMR (101 MHz,  $\text{CDCl}_3$ ): 169.1, 140.4, 139.2, 138.7, 134.2, 133.8, 133.4, 132.5, 130.3, 129.5, 128.8 (dd,  $J_{\text{C-F}} = 7.3, 3.6$  Hz), 126.6, 125.6 (q,  $J_{\text{C-F}} = 3.4$  Hz), 123.1. HRMS (ESI) calcd. for  $\text{C}_{14}\text{H}_9\text{F}_3\text{NOS}^+$  ( $\text{M} + \text{H}^+$ )  $m/z$  296.0352, found 296.0354.

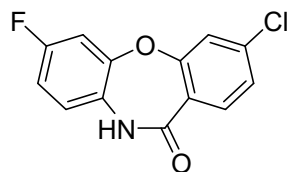

**3-chloro-7-fluorodibenzo[*b,f*][1,4]oxazepin-11(10H)-one (3n).** White

solid. M.p. 225–227 °C. 31mg, 59% yield.  $^1\text{H}$  NMR (400 MHz, DMSO): 10.61 (s, 1H), 7.78 (d,  $J = 8.4$  Hz, 1H), 7.55 (d,  $J = 1.9$  Hz, 1H), 7.43 (dd,  $J = 8.4, 2.0$  Hz, 1H), 7.34 (dd,  $J = 9.0, 2.8$  Hz, 1H), 7.19 (dd,  $J = 8.9, 5.9$  Hz, 1H), 7.10 (td,  $J = 8.5, 2.8$  Hz, 1H).  $^{13}\text{C}$  NMR (101 MHz, DMSO): 164.9, 159.3 (d,  $J = 243.4$  Hz), 159.2, 150.9 (d,  $J = 11.5$  Hz), 138.6, 133.4, 128.1 (d,  $J = 3.2$  Hz), 126.6, 124.9, 123.2 (d,  $J = 9.6$  Hz), 121.5, 113.7 (d,  $J = 22.5$  Hz), 109.6 (d,  $J = 24.8$  Hz). HRMS (ESI) calcd. for  $\text{C}_{13}\text{H}_8\text{ClFNO}_2^+$  ( $\text{M} + \text{H}^+$ )  $m/z$  264.0223, found 264.0222.

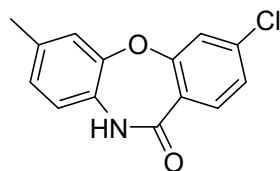

**3-chloro-7-methyldibenzo[*b,f*][1,4]oxazepin-11(10H)-one (3o).** White

solid. M.p. 192–195 °C. 45mg, 86% yield.  $^1\text{H}$  NMR (400 MHz, DMSO): 10.52 (s, 1H), 7.76 (d,  $J = 8.4$  Hz, 1H), 7.51 (d,  $J = 2.0$  Hz, 1H), 7.39 (dd,  $J = 8.4, 2.1$  Hz, 1H), 7.18 (d,  $J = 1.0$  Hz, 1H), 7.02 (dt,  $J = 8.1, 4.6$  Hz, 2H), 2.26 (s, 3H).  $^{13}\text{C}$  NMR (101 MHz,  $\text{CDCl}_3$ ): 170.6, 164.5, 155.0, 143.7, 140.3, 137.6, 133.0, 131.5, 130.2, 129.5, 126.5, 126.4, 125.8, 25.4. HRMS (ESI) calcd. for  $\text{C}_{14}\text{H}_{11}\text{ClNO}_2^+$  ( $\text{M} + \text{H}^+$ )  $m/z$  260.0473, found 260.0475.

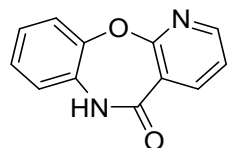

**benzo[*b*]pyrido[3,2-*f*][1,4]oxazepin-5(6H)-one (3p)** <sup>[8]</sup>. Yellow solid. M.p. 128–

129 °C. 35mg, 83% yield.  $^1\text{H}$  NMR (400 MHz, DMSO): 10.74 (s, 1H), 8.50 (dd,  $J = 4.7, 1.8$  Hz, 1H), 8.26 (dd,  $J = 7.5, 1.8$  Hz, 1H), 7.45 (dd,  $J = 7.5, 4.8$  Hz, 1H), 7.33 (d,  $J = 7.7$  Hz, 1H), 7.25 – 7.10 (m, 3H).  $^{13}\text{C}$  NMR (101 MHz,  $\text{CDCl}_3$ ): 165.0, 162.9, 152.9, 148.6, 142.9, 126.9, 126.1, 123.0, 122.4, 122.2, 120.6. HRMS (ESI) calcd. for  $\text{C}_{12}\text{H}_9\text{N}_2\text{O}_2^+$  ( $\text{M} + \text{H}^+$ )  $m/z$  213.0659, found 213.0660.

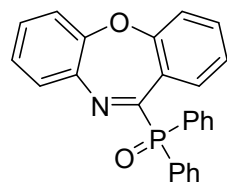

**dibenzo[*b,f*][1,4]oxazepin-11-ylidiphenylphosphine oxide (5aA)** White

solid. M.p. 167–169 °C. 62mg, 78% yield.  $^1\text{H}$  NMR (400 MHz,  $\text{CDCl}_3$ ) 8.17 (d,  $J = 7.5$  Hz, 1H), 8.03 – 7.91 (m, 4H), 7.56 – 7.39 (m, 7H), 7.28 – 7.21 (m, 2H), 7.20 – 7.12 (m, 4H).  $^{13}\text{C}$  NMR (101 MHz,  $\text{CDCl}_3$ ): 168.4, 167.2, 160.5 (d,  $J_{\text{C-P}} = 7.2$  Hz), 151.3, 139.6 (d,  $J_{\text{C-P}} = 27.2$  Hz), 132.7, 131.6, 131.4, 131.3, 131.1 (d,  $J_{\text{C-P}} = 2.8$  Hz), 130.6, 129.6, 128.9, 127.7 (d,  $J_{\text{C-P}} = 1.3$  Hz), 127.5, 127.4, 125.74 (d,  $J_{\text{C-P}} = 27.2$  Hz), 124.8, 124.3, 120.2, 119.9.  $^{31}\text{P}$  NMR (162 MHz,  $\text{CDCl}_3$ ) 26.26. HRMS (ESI) calcd. for  $\text{C}_{25}\text{H}_{19}\text{NO}_2\text{P}^+$  ( $\text{M} + \text{H}^+$ )  $m/z$  396.1148, found 396.1149.

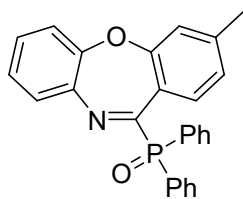

**(3-methyldibenzo[*b,f*][1,4]oxazepin-11-yl)diphenylphosphine oxide**

**(5bA).** White solid. M.p. 169-170 °C. 38mg, 46% yield. <sup>1</sup>H NMR (400 MHz, CDCl<sub>3</sub>): 8.04 (d, *J* = 8.4 Hz, 1H), 7.99 – 7.89 (m, 4H), 7.57 – 7.42 (m, 6H), 7.25 – 7.12 (m, 2H), 7.00 – 6.94 (m, 2H), 2.32 (s, 3H). <sup>13</sup>C NMR (101 MHz, CDCl<sub>3</sub>): 168.6 (d, *J* = 125.2 Hz), 161.5 (d, *J* = 7.3 Hz), 152.3, 145.0, 140.7 (d, *J* = 27.7 Hz), 132.7, 132.3, 132.3, 132.0, 132.0, 131.6, 130.4, 129.7, 128.6 (d, *J* = 1.3 Hz), 128.5, 128.4, 126.1, 125.7, 124.0 (d, *J* = 27.5 Hz), 121.4, 121.1, 21.5. <sup>31</sup>P NMR (162 MHz, CDCl<sub>3</sub>) 26.34. HRMS (ESI) calcd. for C<sub>26</sub>H<sub>21</sub>NO<sub>2</sub>P<sup>+</sup> (M + H<sup>+</sup>) *m/z* 410.1305, found 410.1306.

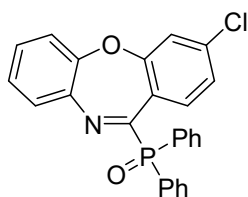

**(3-chlorodibenzo[*b,f*][1,4]oxazepin-11-yl)diphenylphosphine oxide**

**(5cA).** White solid. M.p. 157-159 °C. 18mg, 21% yield. <sup>1</sup>H NMR (400 MHz, CDCl<sub>3</sub>): 8.16 (d, *J* = 8.2 Hz, 1H), 7.99 – 7.85 (m, 4H), 7.58 – 7.44 (m, 6H), 7.29 – 7.26 (m, 1H), 7.25 – 7.13 (m, 5H). <sup>13</sup>C NMR (101 MHz, CDCl<sub>3</sub>): 160.8 (d, *J* = 189.8 Hz), 151.8, 140.2 (d, *J* = 9.3 Hz), 139.5, 133.2, 132.3, 132.2, 132.2, 131.5, 131.2, 130.1, 128.8, 128.6, 128.5, 126.4, 126.2, 125.8, 125.8, 121.9, 121.4 (d, *J* = 12.3 Hz), 121.4 (d, *J* = 36.3 Hz). <sup>31</sup>P NMR (162 MHz, CDCl<sub>3</sub>) 26.56. HRMS (ESI) calcd. for C<sub>25</sub>H<sub>18</sub>ClNO<sub>2</sub>P<sup>+</sup> (M + H<sup>+</sup>) *m/z* 430.0759, found 430.0763.

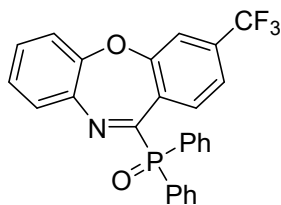

**diphenyl(3-(trifluoromethyl)dibenzo[*b,f*][1,4]oxazepin-11-**

**yl)phosphine oxide (5dA).** White solid. M.p. 100-102 °C. 12mg, 13% yield. <sup>1</sup>H NMR (400 MHz, CDCl<sub>3</sub>): 8.32 (d, *J* = 8.1 Hz, 1H), 8.00 – 7.90 (m, 4H), 7.60 – 7.39 (m, 8H), 7.33 – 7.27 (m, 2H), 7.23 – 7.15 (m, 2H). <sup>13</sup>C NMR (101 MHz, CDCl<sub>3</sub>): 167.9 (d, *J* = 124.5 Hz), 161.4 (d, *J* = 7.0 Hz), 151.7, 140.2 (d, *J* = 26.4 Hz), 135.1 (d, *J* = 33.3 Hz), 132.6, 132.32, 132.31, 132.2, 132.0, 131.4, 131.0, 130.4, 129.6 (d, *J* = 26.9 Hz), 129.57 (dd, *J* = 321.4, 294.5 Hz), 128.9 (d, *J* = 1.3 Hz), 128.7, 128.6, 126.3, 122.2 (dd, *J* = 7.2, 3.6 Hz), 121.2, 118.3 (dd, *J* = 7.2, 3.6 Hz). <sup>31</sup>P NMR (162 MHz, CDCl<sub>3</sub>) 26.45. HRMS (ESI) calcd. for C<sub>26</sub>H<sub>18</sub>F<sub>3</sub>NO<sub>2</sub>P<sup>+</sup> (M + H<sup>+</sup>) *m/z* 464.1022, found 464.1029.

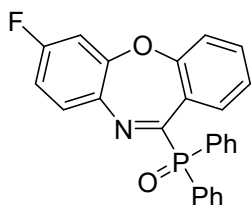

**(7-fluorodibenzo[*b,f*][1,4]oxazepin-11-yl)diphenylphosphine oxide**

**(5eA).** White solid. M.p. 189-192 °C. 50mg, 61% yield. <sup>1</sup>H NMR (400 MHz, CDCl<sub>3</sub>): 8.16 (d, *J* = 7.9 Hz, 1H), 7.97 – 7.89 (m, 4H), 7.58 – 7.37 (m, 7H), 7.24 – 7.11 (m, 3H), 6.92 – 6.82 (m, 2H). <sup>13</sup>C NMR (101 MHz, CDCl<sub>3</sub>): 168.2 (dd, *J* = 125.1, 1.5 Hz), 164.5, 162.0, 160.8 (d, *J* = 7.1 Hz),

152.7 (d,  $J = 11.3$  Hz), 137.1 (dd,  $J = 28.1, 3.6$  Hz), 133.8, 132.4, 132.3, 132.2, 132.1 (d,  $J = 2.6$  Hz), 131.4, 130.7, 129.8 (dd,  $J = 10.1, 1.3$  Hz), 128.5 (d,  $J = 12.3$  Hz), 126.7, 126.5, 125.7, 120.9, 112.9 (d,  $J = 22.3$  Hz), 108.8 (d,  $J = 24.5$  Hz).  $^{31}\text{P}$  NMR (162 MHz,  $\text{CDCl}_3$ ) 26.58. HRMS (ESI) calcd. for  $\text{C}_{25}\text{H}_{18}\text{FNO}_2\text{P}^+$  ( $\text{M} + \text{H}^+$ )  $m/z$  414.1054, found 414.1055.

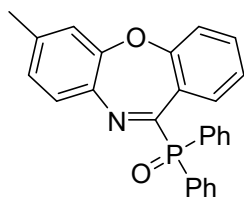

**(7-methyldibenzo[*b,f*][1,4]oxazepin-11-yl)diphenylphosphine oxide**

**(5fA).** White solid. M.p. 165-167 °C. 35mg, 43% yield.  $^1\text{H}$  NMR (400 MHz,  $\text{CDCl}_3$ ): 8.15 (d,  $J = 7.9$  Hz, 1H), 7.96 (dd,  $J = 11.6, 7.0$  Hz, 4H), 7.57 – 7.38 (m, 7H), 7.21 – 7.10 (m, 3H), 6.96 (d,  $J = 7.6$  Hz, 2H), 2.32 (s, 3H).  $^{13}\text{C}$  NMR (101 MHz,  $\text{CDCl}_3$ ): 167.3, 166.1, 160.3 (d,  $J_{\text{C-P}} = 7.3$  Hz), 150.9, 139.8, 137.1 (d,  $J_{\text{C-P}} = 27.7$  Hz), 132.5, 131.8, 131.3, 131.3, 130.9 (d,  $J_{\text{C-P}} = 2.5$  Hz), 130.7, 129.6, 127.5, 127.4, 126.0, 125.7, 125.5, 124.2, 120.6, 119.9, 20.2.  $^{31}\text{P}$  NMR (162 MHz,  $\text{CDCl}_3$ ) 26.19. HRMS (ESI) calcd. for  $\text{C}_{26}\text{H}_{21}\text{NO}_2\text{P}^+$  ( $\text{M} + \text{H}^+$ )  $m/z$  410.1305, found 410.1306.

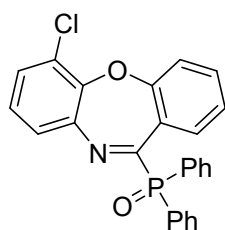

**(6-chlorodibenzo[*b,f*][1,4]oxazepin-11-yl)diphenylphosphine oxide (5gA).**

White solid. M.p. 201-203 °C. 46mg, 54% yield.  $^1\text{H}$  NMR (400 MHz,  $\text{CDCl}_3$ ): 8.20 (dd,  $J = 7.8, 1.1$  Hz, 1H), 7.98 – 7.85 (m, 4H), 7.57 – 7.43 (m, 7H), 7.40 – 7.28 (m, 2H), 7.23 – 7.18 (m, 1H), 7.15 – 7.02 (m, 2H).  $^{13}\text{C}$  NMR (101 MHz,  $\text{CDCl}_3$ ): 169.8 (d,  $J = 123.5$  Hz), 161.0 (d,  $J = 7.1$  Hz), 147.5, 141.8 (d,  $J = 27.5$  Hz), 133.9, 132.3, 132.21, 132.19, 132.17, 131.1, 130.6, 129.6, 128.6, 128.5, 128.5, 128.4, 126.8 (d,  $J = 1.3$  Hz), 126.7, 126.5 (d,  $J = 1.6$  Hz), 125.7 (d,  $J = 2.9$  Hz), 121.5.  $^{31}\text{P}$  NMR (162 MHz,  $\text{CDCl}_3$ ) 26.91. HRMS (ESI) calcd. for  $\text{C}_{25}\text{H}_{18}\text{ClNO}_2\text{P}^+$  ( $\text{M} + \text{H}^+$ )  $m/z$  430.0759, found 430.0763.

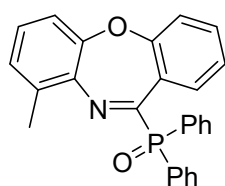

**(9-methyldibenzo[*b,f*][1,4]oxazepin-11-yl)diphenylphosphine oxide (5hA).**

White solid. M.p. 177-179 °C. 52mg, 63% yield.  $^1\text{H}$  NMR (400 MHz,  $\text{CDCl}_3$ ): 8.26 (dd,  $J = 7.8, 1.0$  Hz, 1H), 8.01 – 7.79 (m, 4H), 7.61 – 7.33 (m, 7H), 7.16 (dt,  $J = 17.8, 8.2$  Hz, 3H), 6.98 (t,  $J = 7.0$  Hz, 2H), 2.02 (s, 3H).  $^{13}\text{C}$  NMR (101 MHz,  $\text{CDCl}_3$ ): 166.7, 165.5, 160.5 (d,  $J_{\text{C-P}} = 7.0$  Hz), 151.6, 138.0 (d,  $J_{\text{C-P}} = 26.7$  Hz), 136.5 (d,  $J_{\text{C-P}} = 1.3$  Hz), 132.6, 131.4, 131.3, 131.1 (d,  $J_{\text{C-P}} = 2.8$  Hz), 130.3, 129.5, 128.5, 127.5, 127.4, 126.4, 126.2, 125.9, 124.4, 119.8, 117.5, 17.2.  $^{31}\text{P}$  NMR (162 MHz,  $\text{CDCl}_3$ ) 29.31. HRMS (ESI) calcd. for  $\text{C}_{26}\text{H}_{21}\text{NO}_2\text{P}^+$  ( $\text{M} + \text{H}^+$ )  $m/z$  410.1305, found 410.1306.



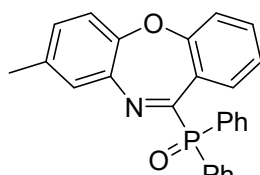

(8-methyldibenzo[*b,f*][1,4]oxazepin-11-yl)diphenylphosphine oxide

**(5iA)**. White solid. M.p. 120-122 °C. 53mg, 65% yield. <sup>1</sup>H NMR (400 MHz, CDCl<sub>3</sub>): 8.12 (dd, *J* = 7.8, 1.2 Hz, 1H), 7.99 – 7.90 (m, 4H), 7.63 – 7.37 (m, 7H), 7.24 – 7.10 (m, 3H), 7.04 (s, 2H), 2.28 (s, 3H). <sup>13</sup>C NMR (101 MHz, CDCl<sub>3</sub>): 168.7 (d, *J* = 125.1 Hz), 161.6 (d, *J* = 7.0 Hz), 150.1, 140.1 (d, *J* = 27.5 Hz), 135.6, 133.6, 132.6, 132.33, 132.31, 132.0 (d, *J* = 2.6 Hz), 131.8, 131.7, 131.6, 130.5 (d, *J* = 11.5 Hz), 128.8 (d, *J* = 1.3 Hz), 128.7, 128.6, 128.5, 128.4, 125.2, 120.8 (d, *J* = 7.6 Hz), 20.7. <sup>31</sup>P NMR (162 MHz, CDCl<sub>3</sub>) 26.29. HRMS (ESI) calcd. for C<sub>26</sub>H<sub>21</sub>NO<sub>2</sub>P<sup>+</sup> (M + H<sup>+</sup>) *m/z* 410.1305, found 410.1313.

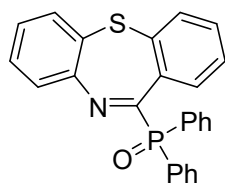

dibenzo[*b,f*][1,4]thiazepin-11-yl)diphenylphosphine oxide (**5jA**).

White solid. M.p. 168-170 °C. 83mg, 87% yield. <sup>1</sup>H NMR (400 MHz, CDCl<sub>3</sub>) : 7.98 – 7.88 (m, 2H), 7.79 – 7.67 (m, 3H), 7.54 – 7.35 (m, 7H), 7.20 – 7.05 (m, 3H), 6.94 – 6.88 (m, 1H), 6.60 (td, *J* = 7.7, 1.3 Hz, 1H), 6.49 (dd, *J* = 8.1, 1.2 Hz, 1H). <sup>13</sup>C NMR (101 MHz, CDCl<sub>3</sub>): 145.0 (d, *J* = 11.4 Hz), 140.2 (d, *J* = 3.7 Hz), 137.2 (d, *J* = 13.3 Hz), 132.8 (d, *J* = 5.6 Hz), 132.1, 131.9 (d, *J* = 2.8 Hz), 131.8, 131.6, 131.5, 131.2, 131.2, 131.0, 130.9, 130.5, 128.9, 128.8 (d, *J* = 1.9 Hz), 128.7 (d, *J* = 3.6 Hz), 128.6 (d, *J* = 3.2 Hz), 128.2 (d, *J* = 4.7 Hz), 119.8 (d, *J* = 26.5 Hz), 117.7. <sup>31</sup>P NMR (162 MHz, CDCl<sub>3</sub>) 31.53. HRMS (ESI) calcd. for C<sub>25</sub>H<sub>19</sub>NOPS<sup>+</sup> (M + H<sup>+</sup>) *m/z* 412.0920, found 412.0924.

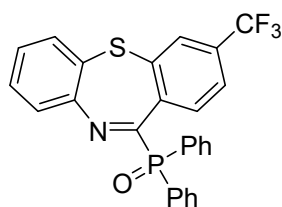

diphenyl(3-(trifluoromethyl)dibenzo[*b,f*][1,4]thiazepin-11-yl)phosphine

oxide (**5mA**) White solid. M.p. 168-170 °C. 83mg, 87% yield. <sup>1</sup>H NMR (400 MHz, CDCl<sub>3</sub>): 9.50 (s, 1H), 8.17 – 7.91 (m, 3H), 7.79 (s, 1H), 7.72 – 7.41 (m, 7H), 7.39 – 7.28 (m, 2H), 7.25 – 7.10 (m, 3H). <sup>13</sup>C NMR (101 MHz, CDCl<sub>3</sub>): 161.4 (d, *J* = 7.0 Hz), 151.7, 140.2 (d, *J* = 26.5 Hz), 135.1 (d, *J* = 33.4 Hz), 132.4, 132.3, 132.3, 132.2, 132.0, 131.4, 130.9, 130.4, 129.6 (q, *J* = 294.5 Hz), 129.4 (d, *J* = 1.3 Hz), 128.9 (d, *J* = 1.2 Hz), 128.7, 128.6, 126.5, 126.3, 124.6, 122.2 (dd, *J* = 6.5, 3.1 Hz), 121.2, 118.3 (d, *J* = 3.6 Hz). <sup>31</sup>P NMR (162 MHz, CDCl<sub>3</sub>) 26.76. HRMS (ESI) calcd. for C<sub>26</sub>H<sub>18</sub>F<sub>3</sub>NOPS<sup>+</sup> (M + H<sup>+</sup>) *m/z* 480.0794, found 480.0780.

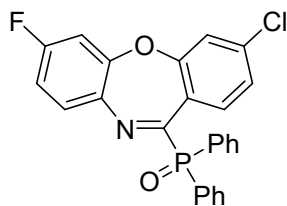

**(3-chloro-7-fluorodibenzo[b,f][1,4]oxazepin-11-**

**yl)diphenylphosphine oxide (5nA).** White solid. M.p. 179-181 °C. 31mg, 35% yield.  $^1\text{H}$  NMR (400 MHz,  $\text{CDCl}_3$ ): 8.17 (d,  $J = 8.4$  Hz, 1H), 7.96 – 7.87 (m, 4H), 7.60 – 7.43 (m, 6H), 7.22 – 7.14 (m, 3H), 6.94 – 6.85 (m, 2H).  $^{31}\text{P}$  NMR (162 MHz,  $\text{CDCl}_3$ ) 26.90.  $^{13}\text{C}$  NMR (101 MHz,  $\text{CDCl}_3$ ): 164.6, 162.1, 161.1 (d,  $J_{\text{P-C}} = 6.7$  Hz), 152.2 (d,  $J_{\text{P-C}} = 11.2$  Hz), 139.6, 132.3, 132.3, 132.2, 132.1, 131.5, 131.1, 123.0 (d,  $J_{\text{P-C}} = 9.0$  Hz), 128.7, 128.5, 126.1, 121.5, 113.4 (d,  $J_{\text{P-C}} = 22.2$  Hz), 108.9 (d,  $J_{\text{P-C}} = 24.6$  Hz). HRMS (ESI) calcd. for  $\text{C}_{25}\text{H}_{17}\text{ClFNO}_2\text{P}^+$  ( $\text{M} + \text{H}^+$ )  $m/z$  448.0664, found 448.0669.

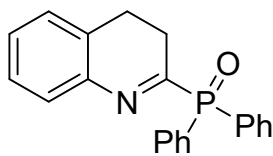

**(3,4-dihydroquinolin-2-yl)diphenylphosphine oxide (5qA).** Yellow

liquid.  $^{31}\text{P}$  NMR (162 MHz,  $\text{CDCl}_3$ ) 31.57. HRMS (ESI) calcd. for  $\text{C}_{21}\text{H}_{19}\text{NOP}^+$  ( $\text{M} + \text{H}^+$ )  $m/z$  332.1199, found 332.1200.

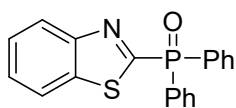

**benzo[d]thiazol-2-yl)diphenylphosphine oxide (5rA).** lit <sup>3</sup>. Yellow solid.

M.p. 175-178 °C. 43mg, 63% yield.  $^1\text{H}$  NMR (400 MHz,  $\text{CDCl}_3$ ): 8.20 (d,  $J = 8.1$  Hz, 1H), 8.05 – 7.89 (m, 5H), 7.61 – 7.42 (m, 8H).  $^{13}\text{C}$  NMR (101 MHz,  $\text{CDCl}_3$ ): 154.5 (d,  $J_{\text{C-P}} = 21.2$  Hz), 135.9, 131.8 (d,  $J_{\text{C-P}} = 2.2$  Hz), 131.4 (d,  $J_{\text{C-P}} = 2.1$  Hz), 131.1 (d,  $J_{\text{C-P}} = 10.2$  Hz), 130.6, 129.5, 127.8 (d,  $J_{\text{C-P}} = 12.8$  Hz), 125.8 (d,  $J_{\text{C-P}} = 4.8$  Hz), 123.9, 121.2.  $^{31}\text{P}$  NMR (162 MHz,  $\text{CDCl}_3$ ) 20.08. HRMS (ESI) calcd. for  $\text{C}_{19}\text{H}_{15}\text{NOPS}^+$  ( $\text{M} + \text{H}^+$ )  $m/z$  336.0606, found 336.0612.

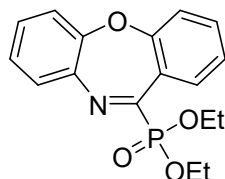

**diethyl dibenzo[b,f][1,4]oxazepin-11-ylphosphonate (5aB).** White solid.

M.p. 61-63 °C. 30mg, 45% yield.  $^1\text{H}$  NMR (400 MHz,  $\text{CDCl}_3$ ):  $^1\text{H}$  NMR (400 MHz,  $\text{CDCl}_3$ ): 7.97 (dd,  $J = 7.8, 1.1$  Hz, 1H), 7.43 – 7.37 (m, 1H), 7.32 (dd,  $J = 7.7, 1.4$  Hz, 1H), 7.23 – 7.03 (m, 5H), 4.25 (p,  $J = 7.2$  Hz, 4H), 1.29 (t,  $J = 7.1$  Hz, 6H).  $^{13}\text{C}$  NMR (101 MHz,  $\text{CDCl}_3$ ): 164.0 (d,  $J = 221.5$  Hz), 160.6 (d,  $J_{\text{C-P}} = 9.9$  Hz), 151.5, 139.4 (d,  $J_{\text{C-P}} = 33.2$  Hz), 132.6, 129.1, 128.8, 127.9 (d,  $J_{\text{C-P}} = 2.0$  Hz), 125.3 (d,  $J_{\text{C-P}} = 34.7$  Hz), 124.9, 124.3, 120.1 (d,  $J_{\text{C-P}} = 0.9$  Hz), 119.9 (d,  $J_{\text{C-P}} = 1.2$  Hz), 63.0 (d,  $J_{\text{C-P}} = 6.9$  Hz), 15.4 (d,  $J_{\text{C-P}} = 6.2$  Hz).  $^{31}\text{P}$  NMR (162 MHz,  $\text{CDCl}_3$ ) 6.67. HRMS (ESI) calcd. for  $\text{C}_{17}\text{H}_{19}\text{NO}_4\text{P}^+$  ( $\text{M} + \text{H}^+$ )  $m/z$  332.1047, found 332.1051.

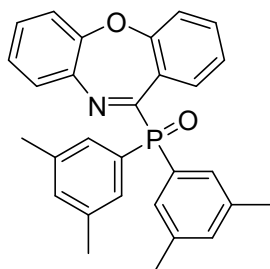

dibenzo[*b,f*][1,4]oxazepin-11-ylbis(3,5-dimethylphenyl)phosphine oxide (**5aC**). White solid. M.p. 161-163 °C. 46mg, 51% yield. <sup>1</sup>H NMR (400 MHz, CDCl<sub>3</sub>): 8.12 (d, *J* = 7.7 Hz, 1H), 7.56 (d, *J* = 12.1 Hz, 4H), 7.40 (t, *J* = 7.7 Hz, 1H), 7.23 (dd, *J* = 15.4, 7.3 Hz, 2H), 7.14 (d, *J* = 8.5 Hz, 6H), 2.33 (s, 12H). <sup>13</sup>C NMR (101 MHz, CDCl<sub>3</sub>): 169.2 (d, *J* = 123.6 Hz), 161.5 (d, *J* = 7.1 Hz), 152.3, 140.7 (d, *J* = 27.2 Hz), 138.1, 137.9, 133.8 (d, *J* = 2.8 Hz), 133.5, 132.3, 131.3, 130.7, 129.8, 129.8, 129.6, 128.5 (d, *J* = 0.9 Hz), 126.9, 126.7, 125.7, 125.2, 121.1, 120.7, 21.5. <sup>31</sup>P NMR (162 MHz, CDCl<sub>3</sub>) 27.26. HRMS (ESI) calcd. for C<sub>29</sub>H<sub>27</sub>NO<sub>2</sub>P<sup>+</sup> (M + H<sup>+</sup>) *m/z* 452.1774, found 452.1767.

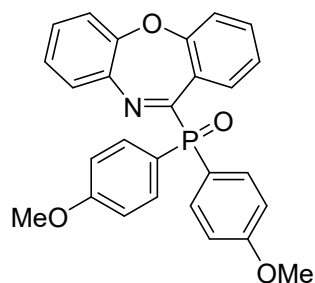

dibenzo[*b,f*][1,4]oxazepin-11-ylbis(4-methoxyphenyl)phosphine oxide (**5aD**). White solid. M.p. 151-153 °C. 28mg, 31% yield. <sup>1</sup>H NMR (400 MHz, CDCl<sub>3</sub>): 8.14 (dd, *J* = 7.7, 1.2 Hz, 1H), 7.90 – 7.81 (m, 4H), 7.42 (td, *J* = 7.8, 1.5 Hz, 1H), 7.25 – 7.21 (m, 2H), 7.20 – 7.12 (m, 4H), 6.97 (dd, *J* = 8.9, 2.3 Hz, 4H), 3.84 (s, 6H). <sup>13</sup>C NMR (101 MHz, CDCl<sub>3</sub>): 169.5 (d, *J* = 125.1 Hz), 162.6 (d, *J* = 2.8 Hz), 161.5 (d, *J* = 7.3 Hz), 152.3, 140.7 (d, *J* = 27.2 Hz), 134.2, 134.1, 133.5, 130.7, 129.7, 128.6 (d, *J* = 1.0 Hz), 126.9, 126.7, 125.8, 125.3, 124.1, 124.0, 123.6, 122.9, 120.9 (d, *J* = 28.6 Hz), 116.1, 114.2, 114.0. <sup>31</sup>P NMR (162 MHz, CDCl<sub>3</sub>) 26.72. HRMS (ESI) calcd. for C<sub>27</sub>H<sub>23</sub>NO<sub>4</sub>P<sup>+</sup> (M + H<sup>+</sup>) *m/z* 456.1359, found 456.1360.

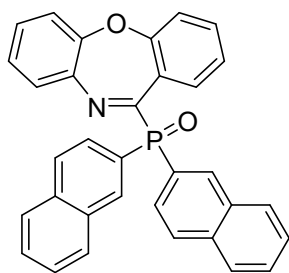

dibenzo[*b,f*][1,4]oxazepin-11-ylidene(naphthalen-2-yl)phosphine oxide (**5aE**). Yellow oil. 41mg, 41% yield. <sup>1</sup>H NMR (400 MHz, CDCl<sub>3</sub>): 8.50 (d, *J* = 14.0 Hz, 2H), 8.17 (dd, *J* = 8.1, 1.2 Hz, 1H), 7.96 – 7.86 (m, 2H), 7.82 (dd, *J* = 8.3, 3.2 Hz, 4H), 7.76 (d, *J* = 8.0 Hz, 2H), 7.53 – 7.39 (m, 4H), 7.38 – 7.28 (m, 1H), 7.21 – 7.11 (m, 2H), 7.10 – 7.01 (m, 4H). <sup>13</sup>C NMR (101 MHz, CDCl<sub>3</sub>): 168.9 (d, *J* = 125.8 Hz), 161.6 (d, *J* = 7.2 Hz), 152.3, 140.6 (d, *J* = 27.5 Hz), 134.9 (d, *J* = 2.2 Hz), 134.5, 134.1 (d, *J* = 8.9 Hz), 133.7, 132.6, 132.5, 132.1, 130.6, 129.8 (d, *J* = 5.5 Hz), 129.2, 128.9, 128.8, 128.7, 128.6, 128.3, 128.2, 128.1, 127.9, 127.3, 127.3, 127.2, 126.9 (d, *J* = 4.7 Hz), 126.7, 125.9, 125.8, 125.3, 125.3, 125.2, 121.7, 121.4, 121.0 (d, *J* = 26.5 Hz). <sup>31</sup>P NMR (162 MHz, CDCl<sub>3</sub>) 26.97. HRMS (ESI) calcd. for C<sub>33</sub>H<sub>23</sub>NO<sub>2</sub>P<sup>+</sup> (M + H<sup>+</sup>) *m/z* 496.1461, found 496.1468.



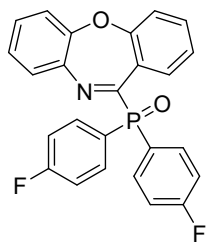

dibenzo[*b,f*][1,4]oxazepin-11-ylbis(4-fluorophenyl)phosphine oxide  
**(5aF)**. Yellow oil. 26mg, 30% yield.  $^1\text{H}$  NMR (400 MHz,  $\text{CDCl}_3$ ): 8.07 (d,  $J = 7.9$  Hz, 1H), 7.92 – 7.80 (m, 4H), 7.38 (td,  $J = 7.9, 1.5$  Hz, 1H), 7.23 – 7.01 (m, 10H).  $^{13}\text{C}$  NMR (101 MHz,  $\text{CDCl}_3$ ): 168.5 (d,  $J = 127.2$  Hz), 166.6 (d,  $J = 3.4$  Hz), 164.1 (d,  $J = 3.4$  Hz), 161.5 (d,  $J = 7.3$  Hz), 152.2, 140.4 (d,  $J = 27.7$  Hz), 134.8 (dd,  $J = 10.4, 9.1$  Hz), 133.9, 130.3 (d,  $J = 39.2$  Hz), 128.6 (d,  $J = 1.3$  Hz), 128.3 (d,  $J = 3.4$  Hz), 127.3 (d,  $J = 3.4$  Hz), 126.5 (d,  $J = 27.7$  Hz), 125.7 (d,  $J = 53.0$  Hz), 121.1 (d,  $J = 25.1$  Hz), 116.0 (dd,  $J = 21.5, 13.4$  Hz).  $^{31}\text{P}$  NMR (162 MHz,  $\text{CDCl}_3$ ) 24.69. HRMS (ESI) calcd. for  $\text{C}_{25}\text{H}_{17}\text{F}_2\text{NO}_2\text{P}^+$  ( $\text{M} + \text{H}^+$ )  $m/z$  432.0960, found 432.0990.

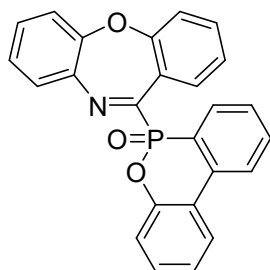

6-(dibenzo[*b,f*][1,4]oxazepin-11-yl)dibenzo[*c,e*][1,2]oxaphosphinine 6-oxide  
**(5aG)**. White solid. M.p. 291-293 °C. 37mg, 45% yield.  $^1\text{H}$  NMR (400 MHz,  $\text{CDCl}_3$ ): 8.32 (dd,  $J = 7.8, 1.0$  Hz, 1H), 8.09 (dd,  $J = 12.5, 7.6$  Hz, 1H), 7.91 (ddd,  $J = 9.3, 7.8, 3.6$  Hz, 2H), 7.69 (t,  $J = 7.7$  Hz, 1H), 7.50 (ddd,  $J = 15.9, 8.2, 2.2$  Hz, 2H), 7.37 – 7.27 (m, 1H), 7.25 – 7.18 (m, 2H), 7.17 – 7.08 (m, 2H), 7.03 (dd,  $J = 15.9, 7.6$  Hz, 3H), 6.89 (d,  $J = 7.7$  Hz, 1H).  $^{13}\text{C}$  NMR (101 MHz,  $\text{CDCl}_3$ ): 166.4 (d,  $J = 165.9$  Hz), 161.5 (d,  $J = 8.7$  Hz), 152.1, 149.5 (d,  $J = 8.3$  Hz), 140.3 (d,  $J = 32.7$  Hz), 137.3 (d,  $J = 6.5$  Hz), 133.9, 133.7 (d,  $J = 2.3$  Hz), 131.9 (d,  $J = 9.5$  Hz), 130.4, 129.9 (d,  $J = 4.5$  Hz), 128.8 (d,  $J = 1.6$  Hz), 128.4 (d,  $J = 13.8$  Hz), 125.7, 125.4, 125.4, 125.3, 124.8, 124.4, 123.8 (d,  $J = 10.6$  Hz), 123.4, 123.3, 123.1, 121.0, 120.3 (d,  $J = 6.3$  Hz).  $^{31}\text{P}$  NMR (162 MHz,  $\text{CDCl}_3$ ) 22.82. HRMS (ESI) calcd. for  $\text{C}_{25}\text{H}_{17}\text{NO}_3\text{P}^+$  ( $\text{M} + \text{H}^+$ )  $m/z$  410.0941, found 410.0938.

## 7. Scale up reaction and application

### 1) Scale up reaction of **3j** using continuous flow reactor

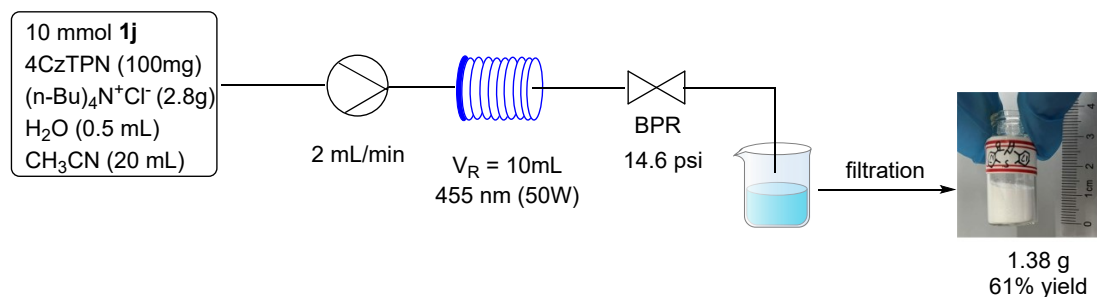

To a 250 mL solution bottle was added dibenzo[*b,f*][1,4]thiazepine **1j** (10 mmol, 2.11 g), photocatalyst 4CzTPN (0.1 mmol, 100 mg), and tetrabutyl ammonium chloride (10 mmol, 2.8 g). Consequently, the reactants were dissolved in 20 mL CH<sub>3</sub>CN and 0.5 mL water, then charged with N<sub>2</sub> atmosphere. It was moved into a 10 mL coiled tubing loaded by a peristaltic pump. The reaction mixture was passed to a micro flow reactor which was illuminated with eight 50 W, 455 nm RLR-18CF blue LEDs. A circulating water system used to keep the reactor's temperature be constant. And the reaction was keeping the flow rate of 2 mL per min and underwent continuous reaction for 12 h. The obtained yellow mixture was filtered and dried, the white product **3j** was gave in 61% yield.

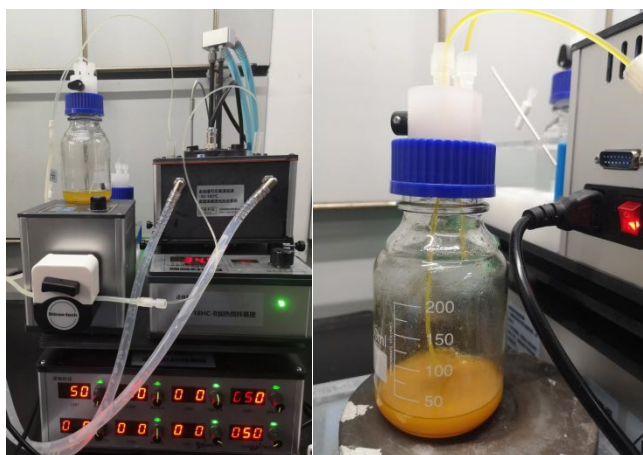

**Figure S1** Scale up reaction of **3j** using continuous flow reactor.

## 2) Synthetic transformations of 3j

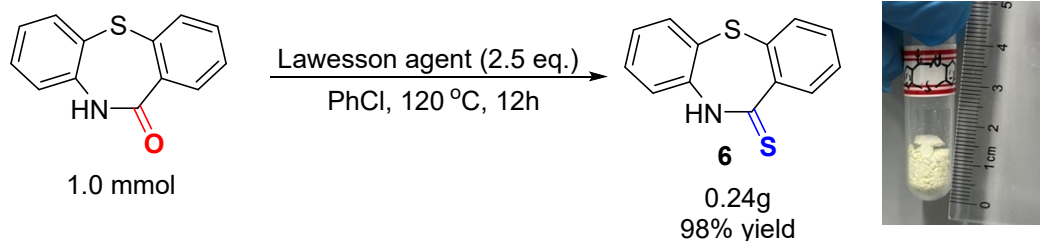

To a 10 mL Schlenk tube containing a stir bar were charged with dibenzo[*b,f*][1,4]thiazepin-11(10H)-one **3j** (227 mg, 1 mmol), Lawesson's Reagent (1.01 g, 2.5 mmol, 2.5 equiv), and PhCl (3 mL). The resulting solution was stirred at 120 °C for 12 h. The obtained light yellow mixture was filtered and dried, the yellow product **3j** was gave in 98% yield. M.p. 112.5-114.7 °C. <sup>1</sup>H NMR (400 MHz, DMSO): 12.85 (s, 1H), 7.88 – 7.83 (m, 1H), 7.57 (dd, *J* = 7.7, 1.3 Hz, 1H), 7.47 – 7.36 (m, 4H), 7.35 – 7.30 (m, 1H), 7.23 (td, *J* = 7.6, 1.5 Hz, 1H). <sup>13</sup>C NMR (101 MHz, DMSO): 199.9, 142.5, 139.9, 134.1, 132.5, 132.1, 132.1, 131.2, 130.9, 129.4, 128.3, 126.6, 123.4. HRMS (ESI) calcd. for C<sub>13</sub>H<sub>10</sub>NS<sub>2</sub><sup>+</sup> (M + H<sup>+</sup>) *m/z* 244.0250, found 244.0255.

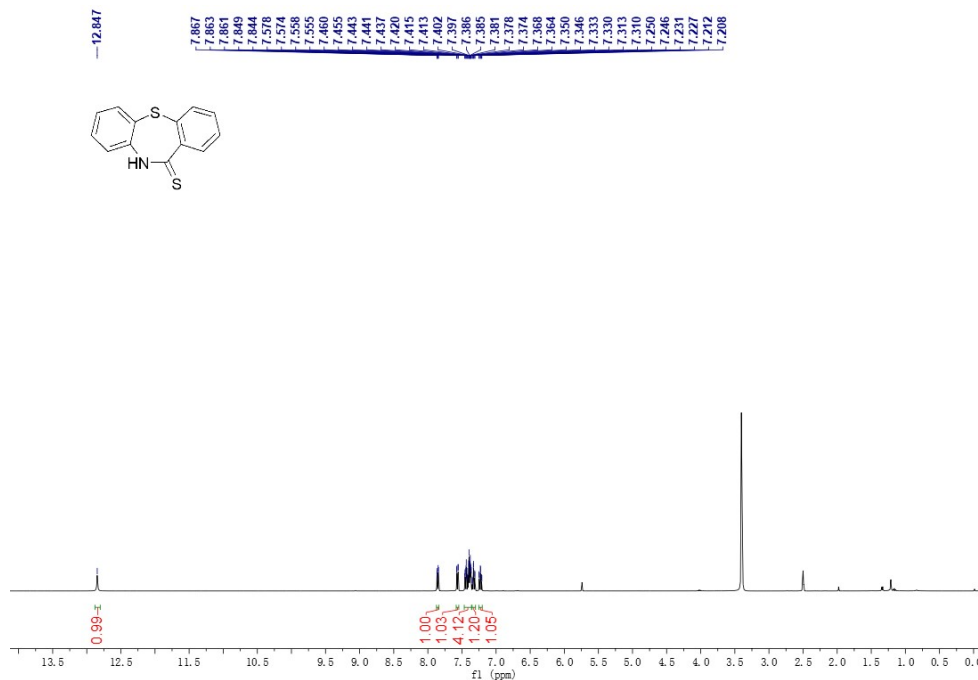

Figure S2 <sup>1</sup>H NMR Spectrum of Compound 6

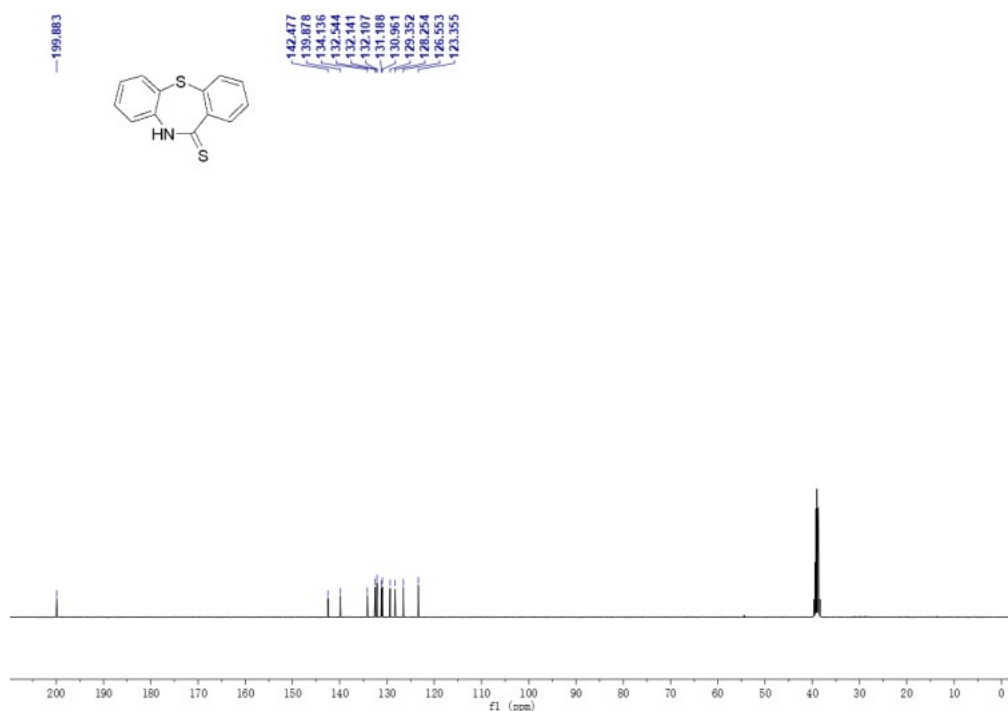

**Figure S3**  $^{13}\text{C}$  NMR Spectrum of Compound **6**

### 3) Scale up reaction of **5qA** in continuous flow

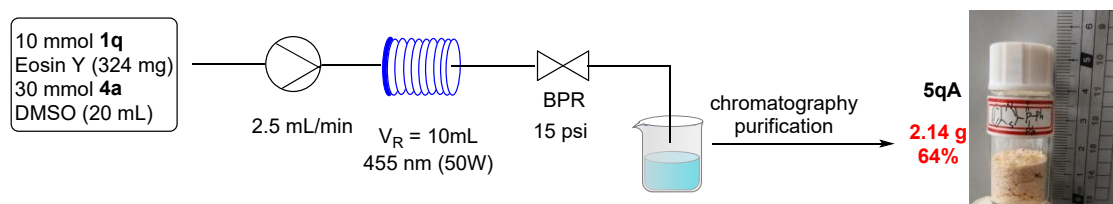

To a 250 mL solution bottle was added benzo[d]thiazole **1q** (10 mmol, 1.35 g), photocatalyst Eosin Y (0.5 mmol, 324 mg), and diphenylphosphine oxide (30 mmol, 6.0 g), Consequently, the reactants were dissolved in 20 mL DMSO and charged with  $\text{N}_2$  atmosphere. It was moved into a 10 mL coiled tubing loaded by a peristaltic pump. The reaction mixture was passed to a micro flow reactor which was illuminated with eight 50 W, 455 nm RLR-18CF blue LEDs. A circulating water system used to keep the reactor's temperature be constant. And the reaction was keeping the flow rate of 2.5 mL per min and underwent continuous reaction for 6 h. The result mixture was added with brine water (100 mL), then extracted with  $\text{CH}_2\text{Cl}_2$  ( $3 \times 20$  mL). The combined organic layers dried over  $\text{NaSO}_4$ . After removal of the solvent in vacuum the residue was purified by flash chromatography (silica gel, 20% EtOAc in PE) to give 2.14 g (64%) of the desired product **5qA**.

### 4) Flame retardancy of **5qA** in epoxy resin

To a 500 mL breaker was added the flame retardant **5qA** (5.0 g) and bisphenol-A diglycidyl ether type epoxy resin (DGEBA) (76.0 g), and the white uniform mixture were mechanically stirred at  $90^\circ\text{C}$  for 30 min. Then the curing agent 4,4-diaminodiphenylmethane (DDM) (19.0 g) was added to the resulting mixture and mechanically stirred for 5 min, and poured into a preheated stainless steel mold and film fixation rapidly. Finally, put it into an air blast oven for curing at  $100^\circ\text{C}$  for 2 h, and heated to  $150^\circ\text{C}$  for curing for 2 h to obtain a flame retardant epoxy resin. The cured epoxy



resins containing 5 wt% **5qA** were denoted as **EP-NS<sub>5%</sub>**.

According to GB/T 2406.2-2009 standard, the limiting oxygen index (LOI) values were evaluated using the JF-3 oxygen index instrument (Jiangning, China) with sample's dimension of 130 mm × 6.5 mm × 3.2 mm. The limiting oxygen index of each sample was the average of five parallel tests. According to GB/T 2408-2008 standard, the vertical burning (UL-94) tests were assessed using the CZF-3 instrument (Jiangning, China) with sample's dimension of 130 mm × 13 mm × 3.2 mm. The burning time of each sample was the average of five parallel tests.

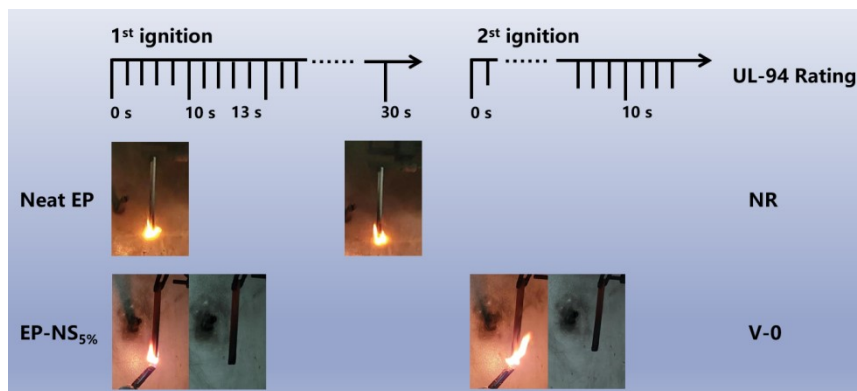

**Figure S4** The vertical burning (UL-94) tests of EP-NS<sub>5%</sub>

## 8. Mechanistic Investigation

### Radical Trap Experiments

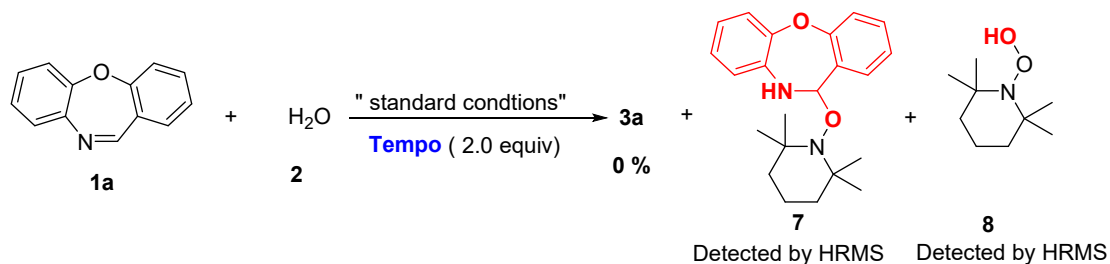

Following the standard procedure, the reaction of dibenzo[*b,f*][1,4]oxazepine **1a** (0.2 mmol), 4CzTPN (1.6 mg, 0.002 mmol, 1 mmol%), tetrabutyl ammonium chloride (27.8 mg, 0.1 mmol), and TEMPO (62.5 mg, 0.40 mmol, 2.0 equiv) were placed in 10 mL Schlenk tube equipped with a magnetic stir bar. After back-filled with nitrogen (this process was repeated three times), water (10  $\mu$ L) and CH<sub>3</sub>CN (2.0 mL) was added, the vial was sealed and exposed to blue LEDs (50 W LED light) at room temperature for 12 h. No product **3a** was observed. The compound **7** and **8** was detected by HRMS.

11-((2,2,6,6-tetramethylpiperidin-1-yl)oxy)-10,11-dihydrodibenzo[*b,f*][1,4]oxazepine **7**. HRMS (ESI) calcd. for C<sub>22</sub>H<sub>29</sub>N<sub>2</sub>O<sub>2</sub><sup>+</sup> (M + H<sup>+</sup>) *m/z* 353.2224, found 353.2215.

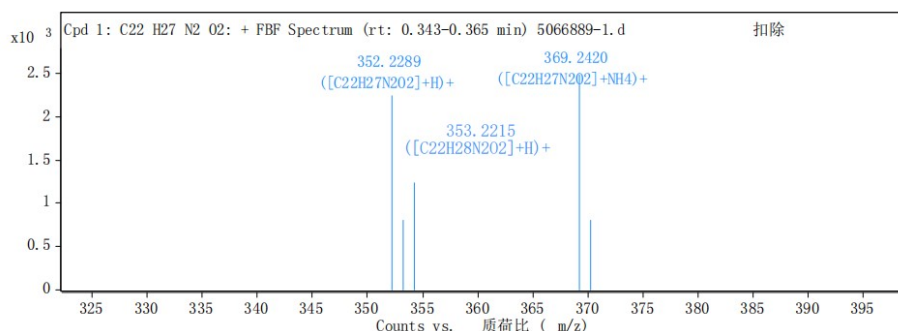

| <i>m/z</i> | <i>z</i> | 丰度      | 分子式                                                           | 离子                                |
|------------|----------|---------|---------------------------------------------------------------|-----------------------------------|
| 352.2289   | 1        | 2242.52 | C <sub>22</sub> H <sub>27</sub> N <sub>2</sub> O <sub>2</sub> | (M+H) <sup>+</sup>                |
| 353.2215   | 1        | 803.18  | C <sub>22</sub> H <sub>27</sub> N <sub>2</sub> O <sub>2</sub> | (M+H) <sup>+</sup>                |
| 354.2169   | 1        | 1243.08 | C <sub>22</sub> H <sub>27</sub> N <sub>2</sub> O <sub>2</sub> | (M+H) <sup>+</sup>                |
| 369.242    | 1        | 2489.04 | C <sub>22</sub> H <sub>27</sub> N <sub>2</sub> O <sub>2</sub> | (M+NH <sub>4</sub> ) <sup>+</sup> |
| 370.2459   | 1        | 807.57  | C <sub>22</sub> H <sub>27</sub> N <sub>2</sub> O <sub>2</sub> | (M+NH <sub>4</sub> ) <sup>+</sup> |

--- 报告结束 ---

Figure S5 The HRMS spectrum of compound **7**



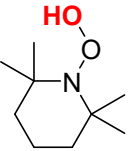
 1-hydroperoxy-2,2,6,6-tetramethylpiperidine **8**. HRMS (ESI) calcd. for C<sub>9</sub>H<sub>20</sub>NO<sub>2</sub>+ (M + H+) m/z 174.1468, found 174.1462.

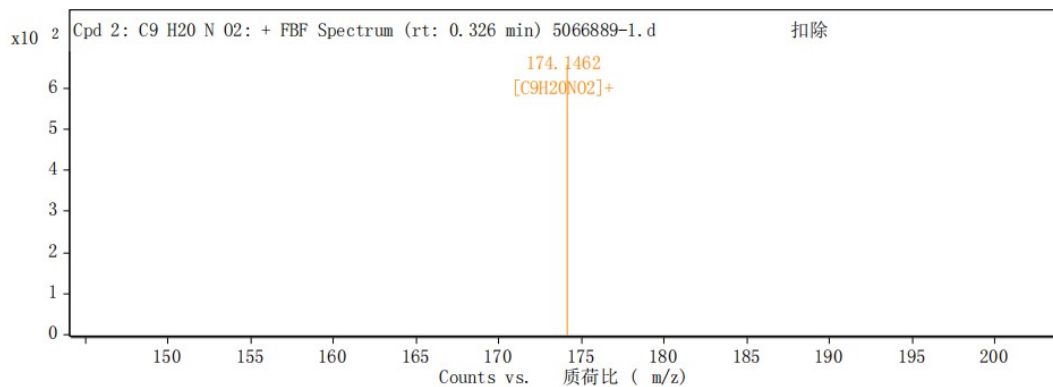

MS 质谱图峰列表

| m/z      | z | 丰度     | 分子式                                            | 离子 |
|----------|---|--------|------------------------------------------------|----|
| 174.1462 | 1 | 655.08 | C <sub>9</sub> H <sub>20</sub> NO <sub>2</sub> | M+ |

Figure S6 HRMS spectrum of compound **8**

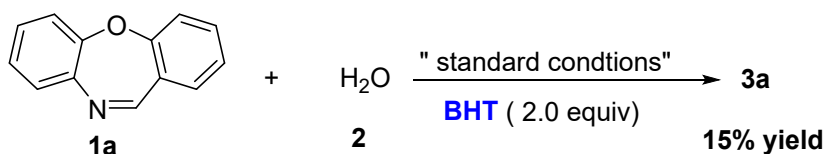

Following the standard procedure, the reaction of dibenzo[*b,f*][1,4]oxazepine **1a** (0.2 mmol), 4CzTPN (1.6 mg, 0.002 mmol, 1 mmol%), tetrabutyl ammonium chloride (27.8 mg, 0.1 mmol), and BHT (88 mg, 0.40 mmol, 2.0 equiv) were placed in 10 mL Schlenk tube equipped with a magnetic stir bar. After back-filled with nitrogen (this process was repeated three times), water (10  $\mu$ L) and CH<sub>3</sub>CN (2.0 mL) was added, the vial was sealed and exposed to blue LEDs (50 W LED light) at room temperature for 12 h. product **3a** was observed in 15% yield.





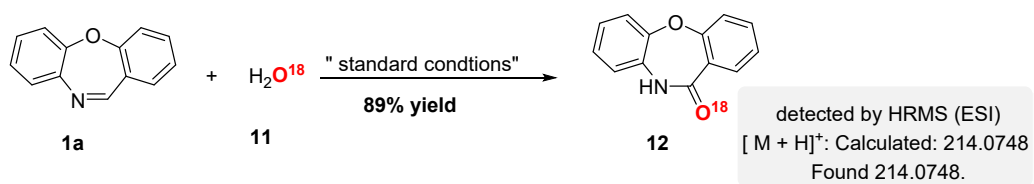

Following the standard procedure. When 10  $\mu\text{L}$   $\text{H}_2\text{O}^{18}$  was added to replace  $\text{H}_2\text{O}$ , the desired **12** was obtained in 89% yield and detected by HRMS as well.

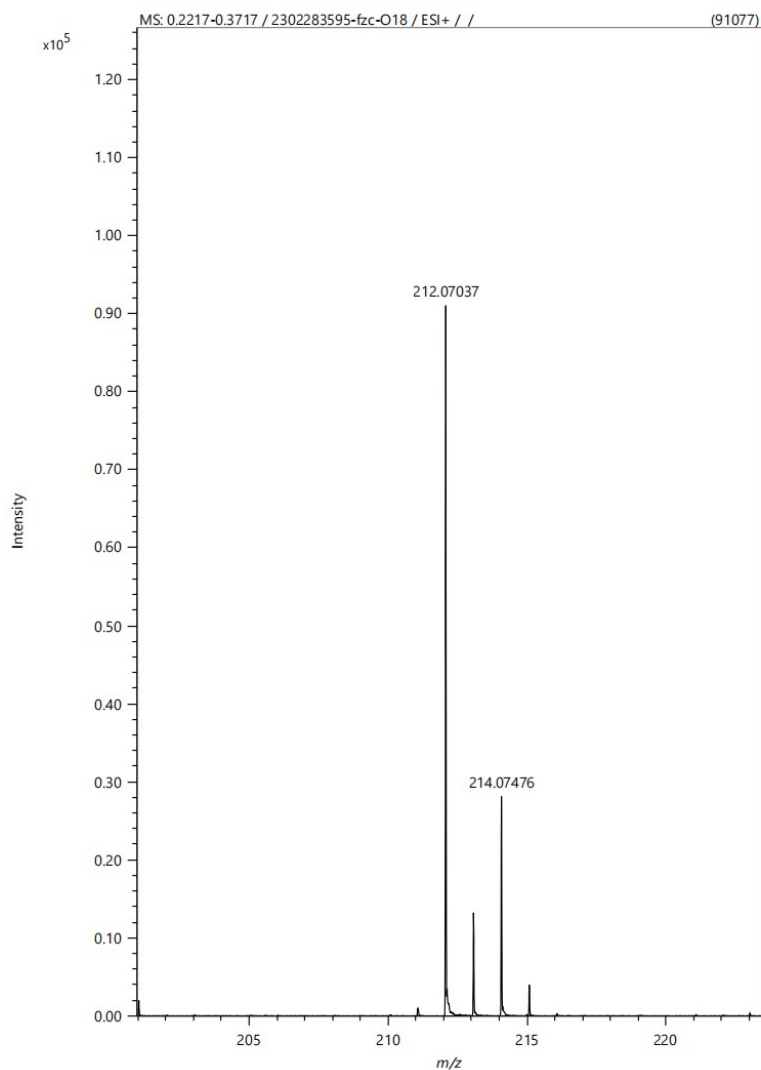

**Figure S9** HRMS spectra of compound **12**

## The Light On-Off Experiment

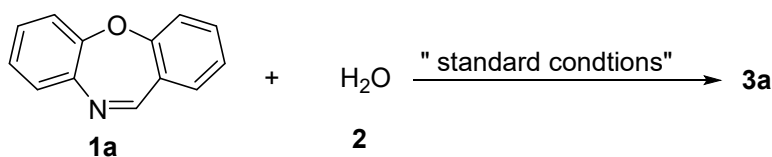

Following the standard procedure. Yield was determined by  $^1\text{H}$  NMR of the crude mixture using 1,3,5-trimethoxybenzene (3.7 mg, 0.022 mmol) as internal standard.

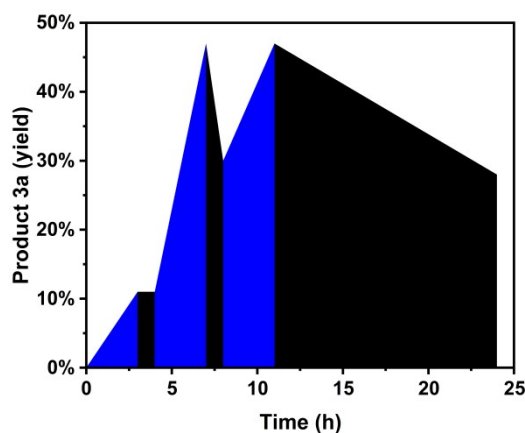

Figure S10 The light on-off experiment

## The EPR Experiment

Following the standard procedure. Dibenzob[*b,f*][1,4]oxazepine **1a** (0.2 mmol), 4CzTPN (1.6 mg, 0.002 mmol, 1 mmol%), tetrabutyl ammonium chloride (27.8 mg, 0.1 mmol), and BHT (88 mg, 0.40 mmol, 2.0 equiv) were placed in 10 mL Schlenk tube equipped with a magnetic stir bar. After back-filled with nitrogen (this process was repeated three times), water (10  $\mu\text{L}$ ) and  $\text{CH}_3\text{CN}$  (2.0 mL) was added, the vial was sealed and exposed to blue LEDs (50 W LED light) at room temperature for 4 h. Then, to the resulted mixture was added radical scavenger 5,5-Dimethyl -1-pyrroline N-oxide (DMPO) (226 mg, 2 mmol) and followed by detecting the EPR signal.

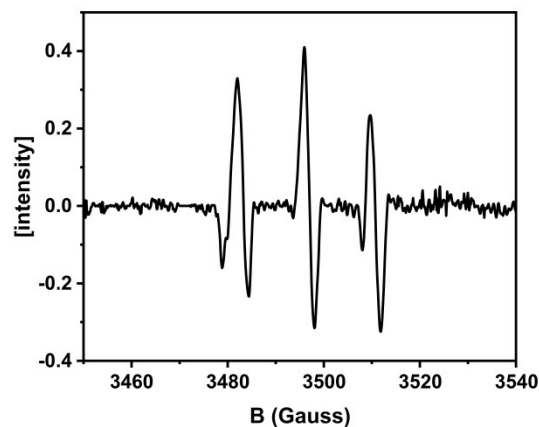

Figure S11 EPR spectra of the reaction mixture.



## 9. Supplemental References

1. Lin, Y. C.; Li, N. C.; Cheng, Y. J. *J. Heterocycl. Chem.*, **2014**, 51, 808–814.
2. Z. C. Fu, Y. L. Lei, F. Sun and J. Xu. *Org. Chem. Front.*, **2022**, 9, 2464–2470.
3. S. F. Sun. D. H. Guo, F. Y. Li and J. Wang. *Org. Chem. Front.*, **2022**, 9, 356.
4. Q. Yang, H. Cao, A. Robertson, and H. Alper. *J. Org. Chem.* **2010**, 75, 6297–6299.
5. K. Luo,, Y. Z. Chen, W. C. Yang, J. Zhu, and L. Wu. *Org. Lett.* **2016**, 18, 3, 452–455.
6. X. Liu. S. T. Yuan, Y. Liu, M. J. Ni, J. B. Xu, S. G. Gui, Y. Y. Peng, Q. P. Ding. *J. Org. Chem.* **2023**, 88, 1, 198–210.
7. N. Kalinina; N. Kruglyak; S. B. Kurochkin. *Pharmaceutical Chemistry Journal.* **1997**, 31, 431–434.
8. A.Kavitha; B. Poongavanam; N. H. Puttappa,; K. S. Sujit. *Synthetic Communications*, **2020**, 50, 348–360.

## 10. Copies of NMR Spectra of Compounds 1, 3 and 5

Copies of  $^1\text{H}$  (400 MHz),  $^{31}\text{P}$  (167 MHz) and  $^{13}\text{C}$  (101 MHz) spectra of products 1a-1o in  $\text{CDCl}_3$  or  $\text{DMSO-d}_6$

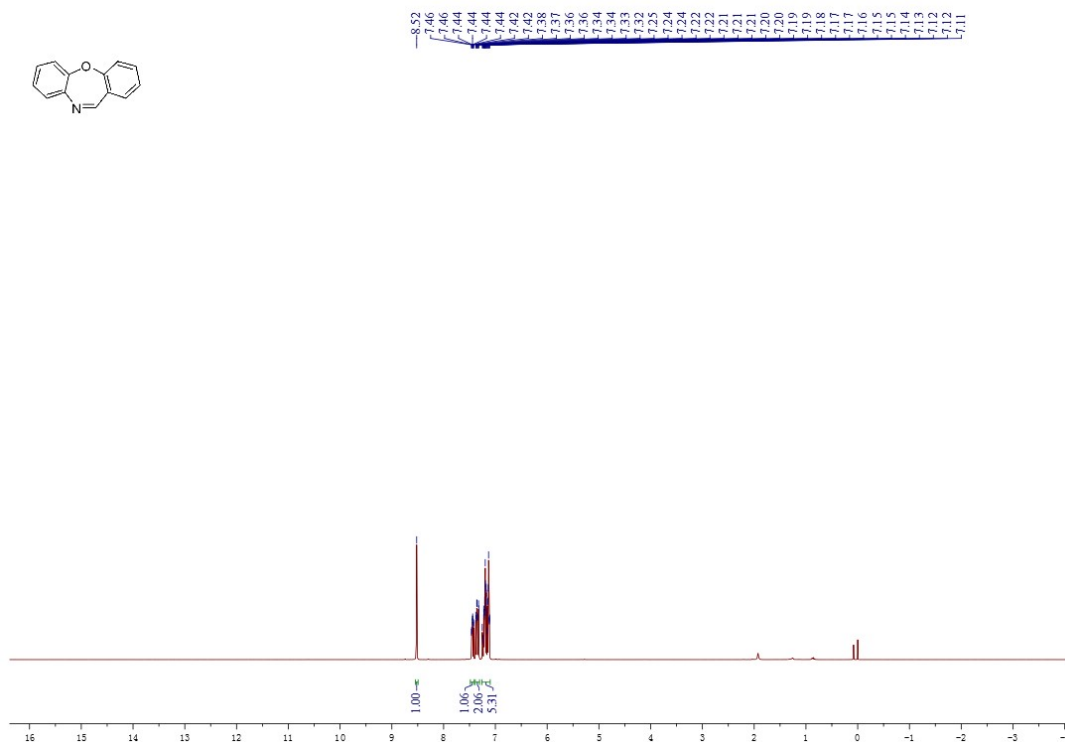

$^1\text{H}$  NMR Spectrum of Compound 1a

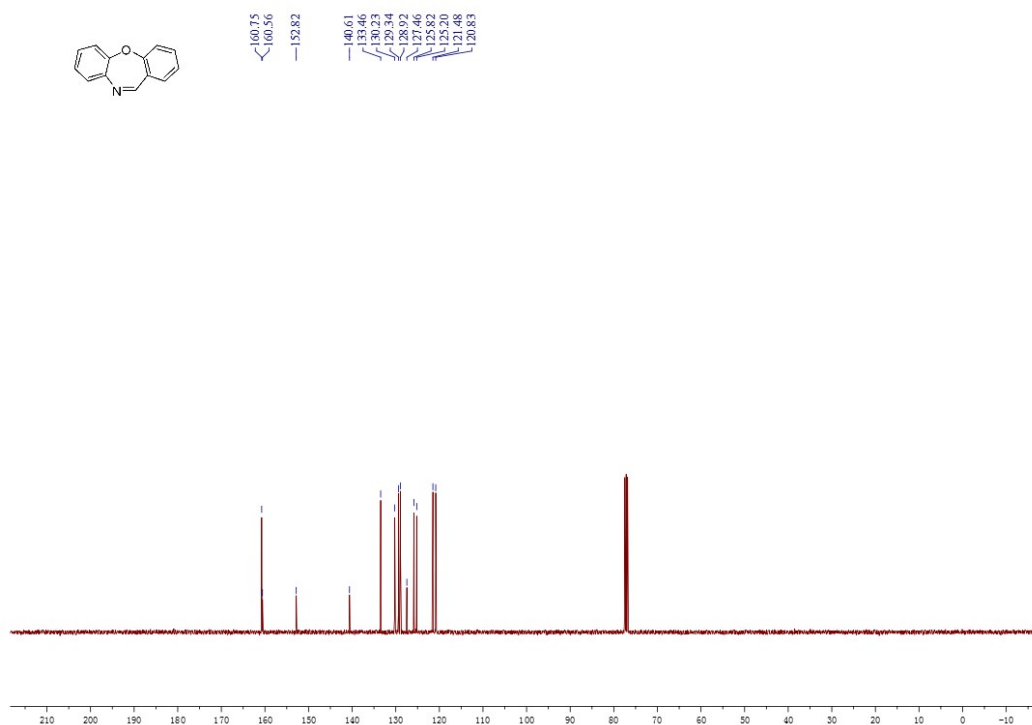

### <sup>13</sup>C NMR Spectrum of Compound 1a

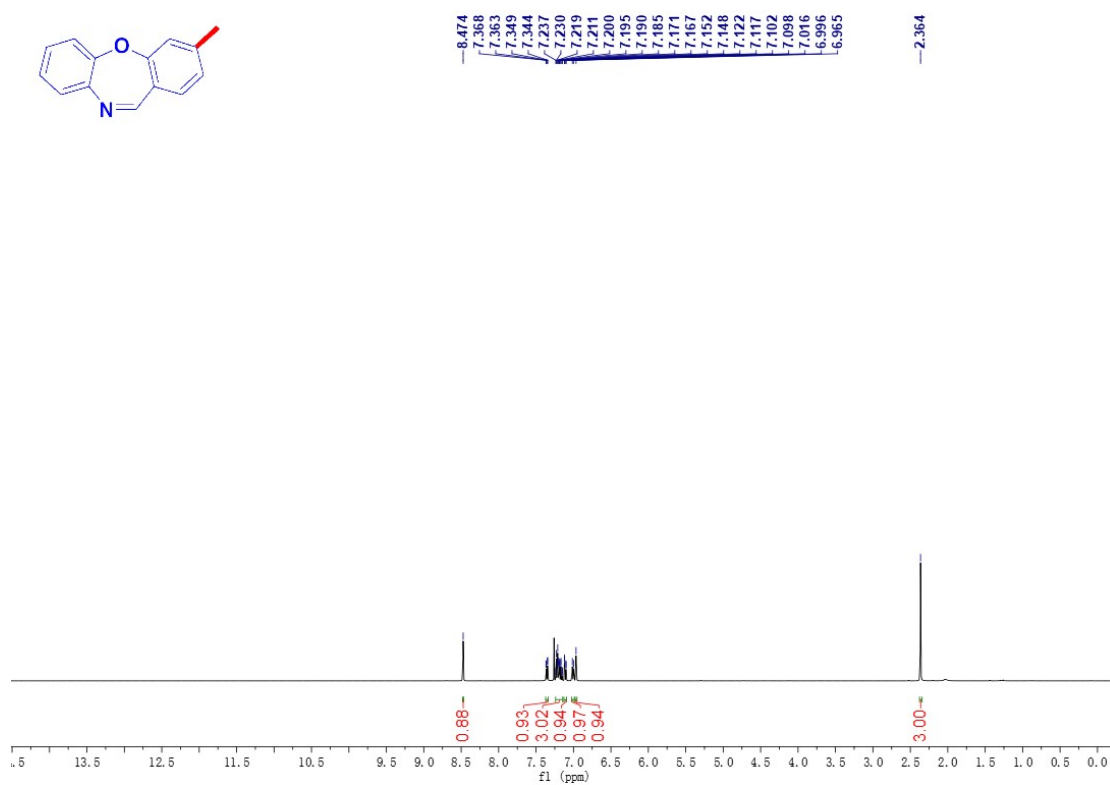

### <sup>1</sup>H NMR Spectrum of Compound 1b

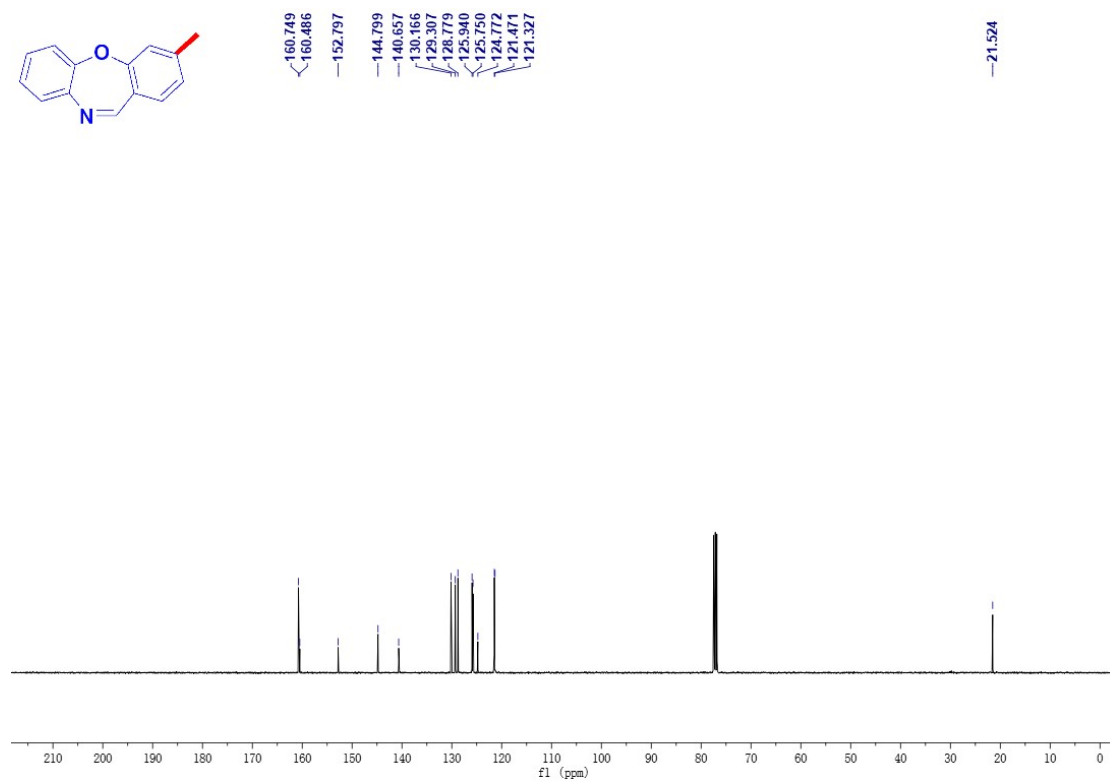

### <sup>13</sup>C NMR Spectrum of Compound 1b

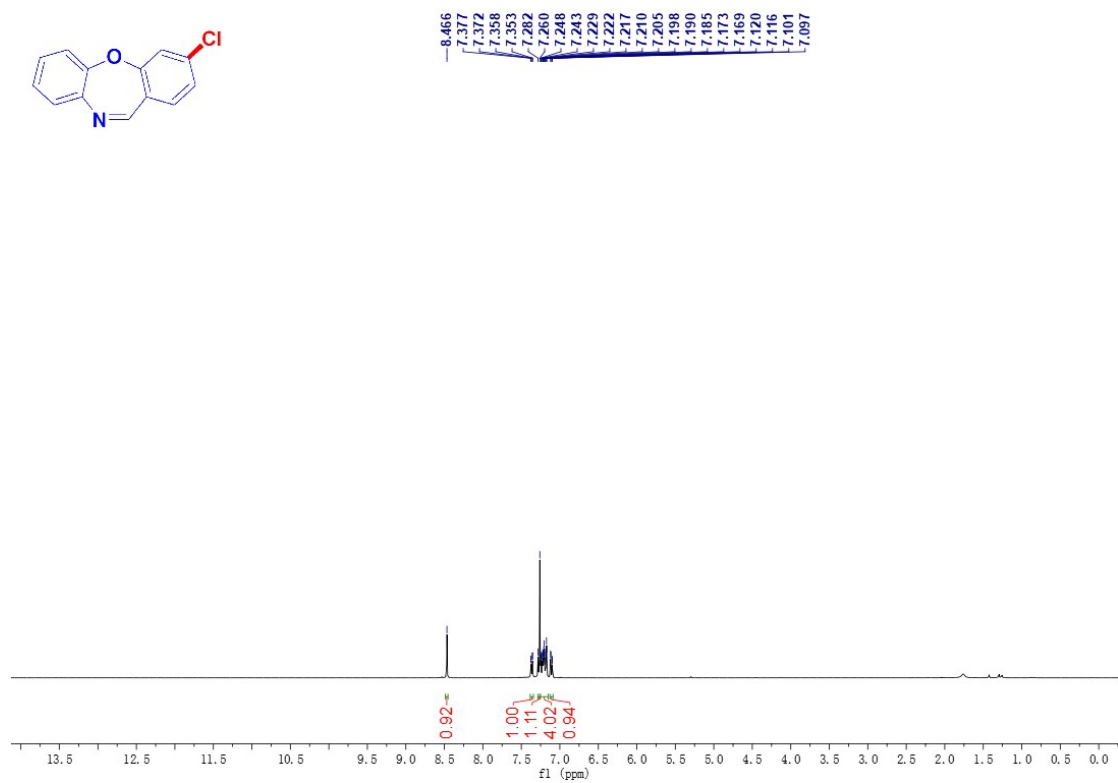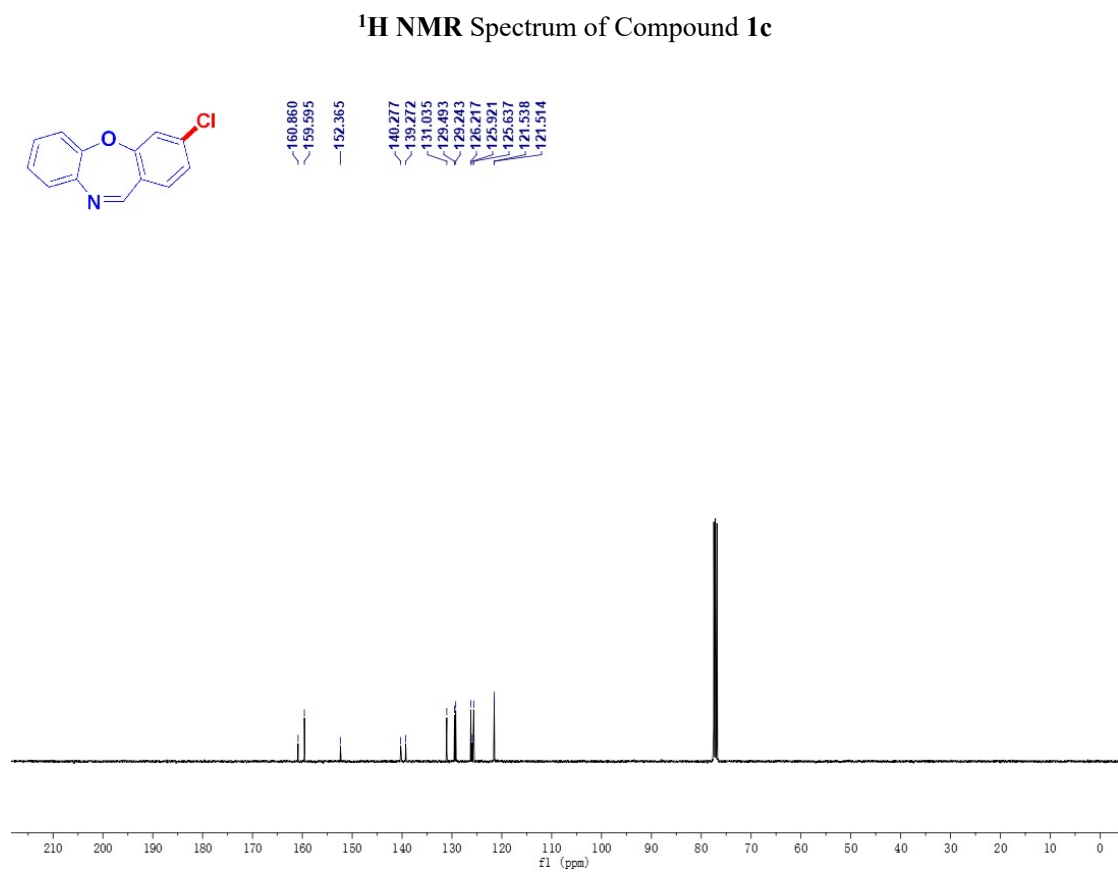

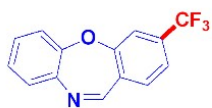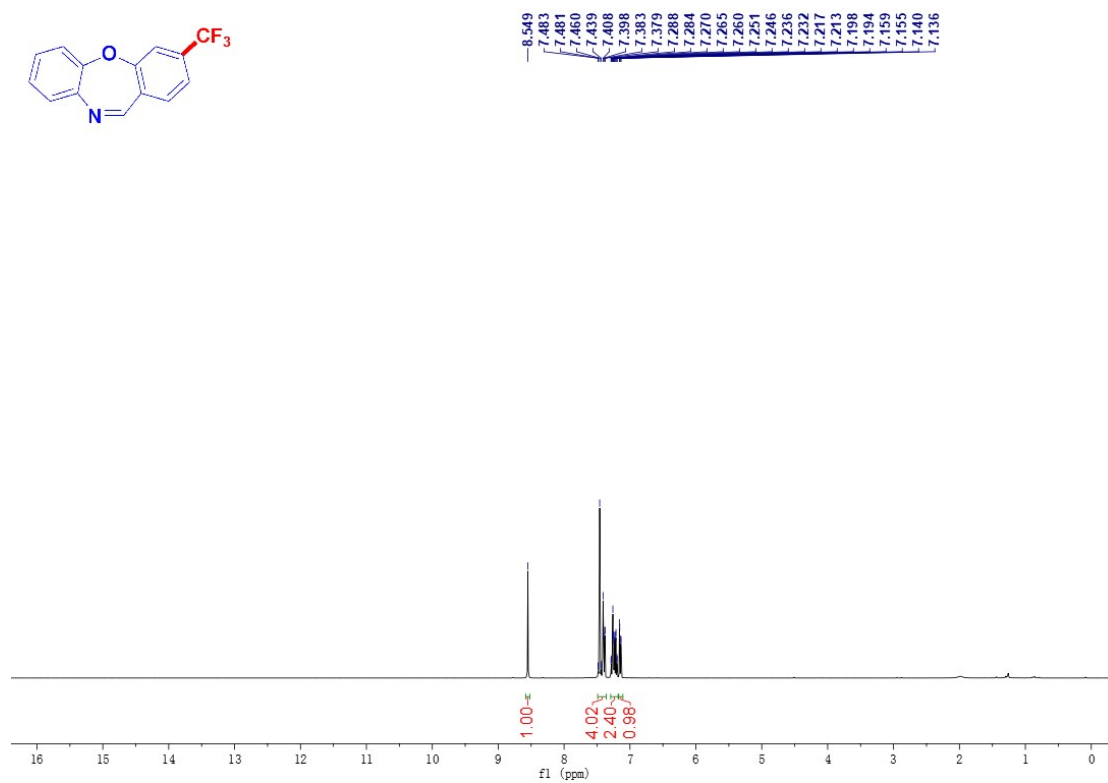

<sup>1</sup>H NMR Spectrum of Compound 1d

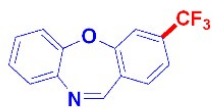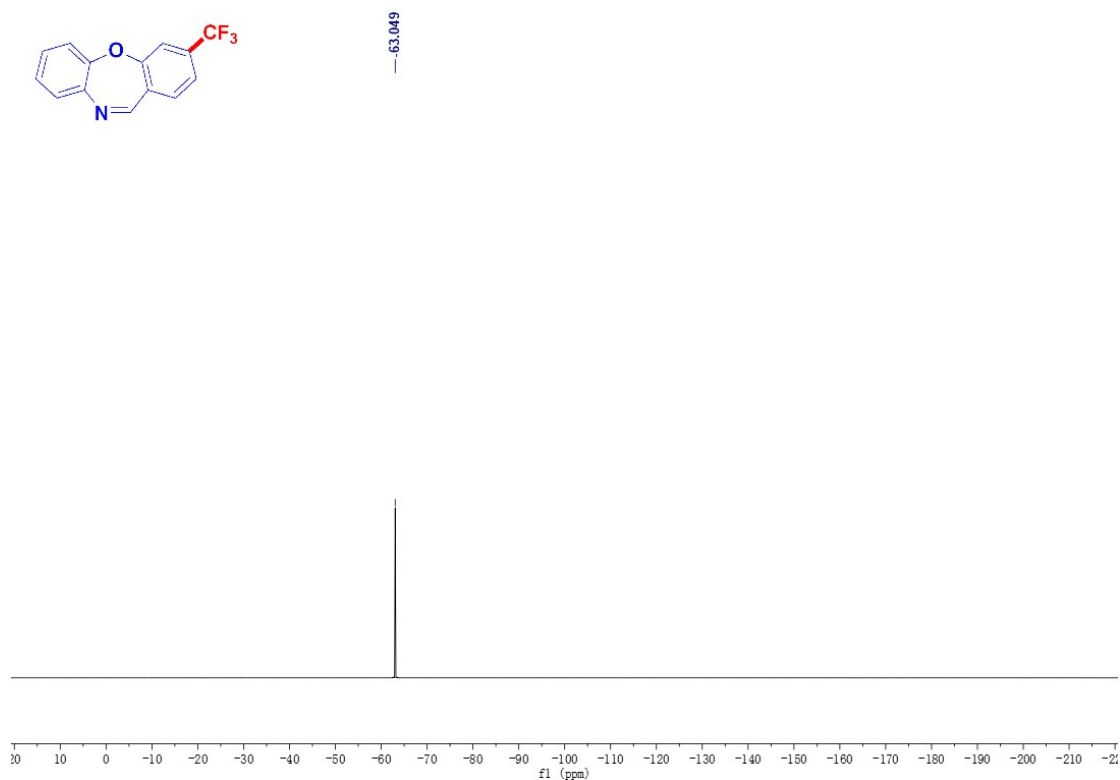

<sup>19</sup>F NMR Spectrum of Compound 1d

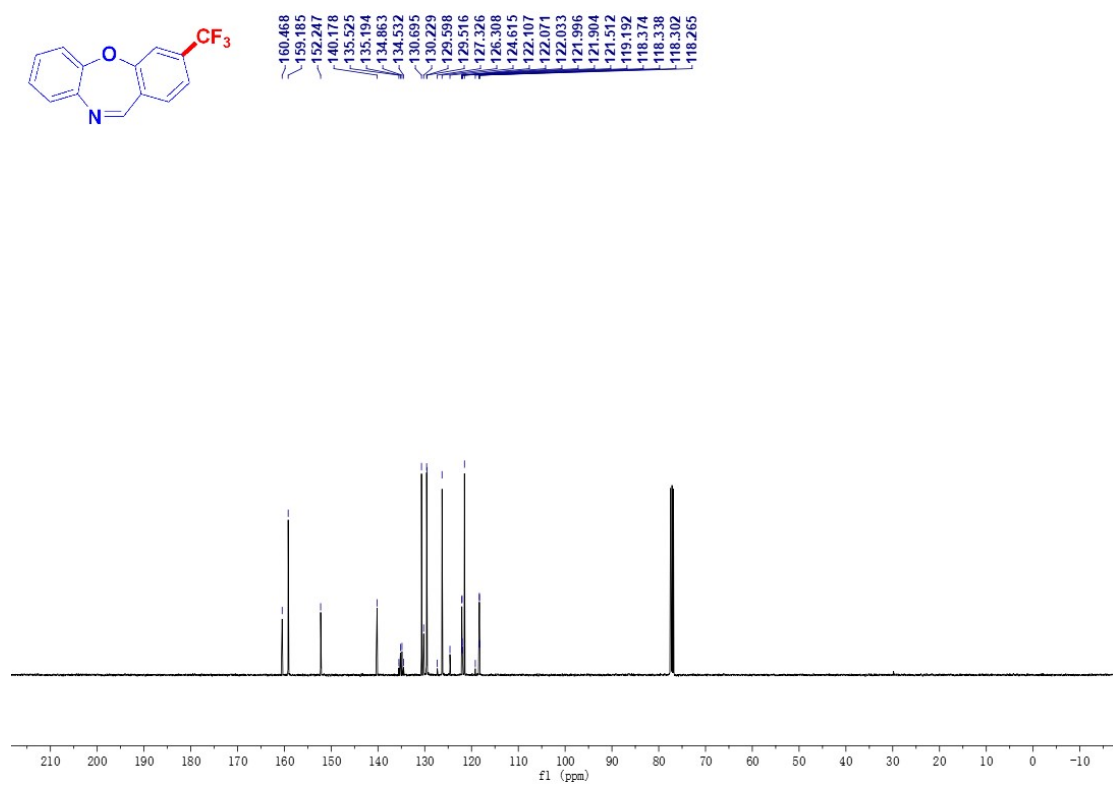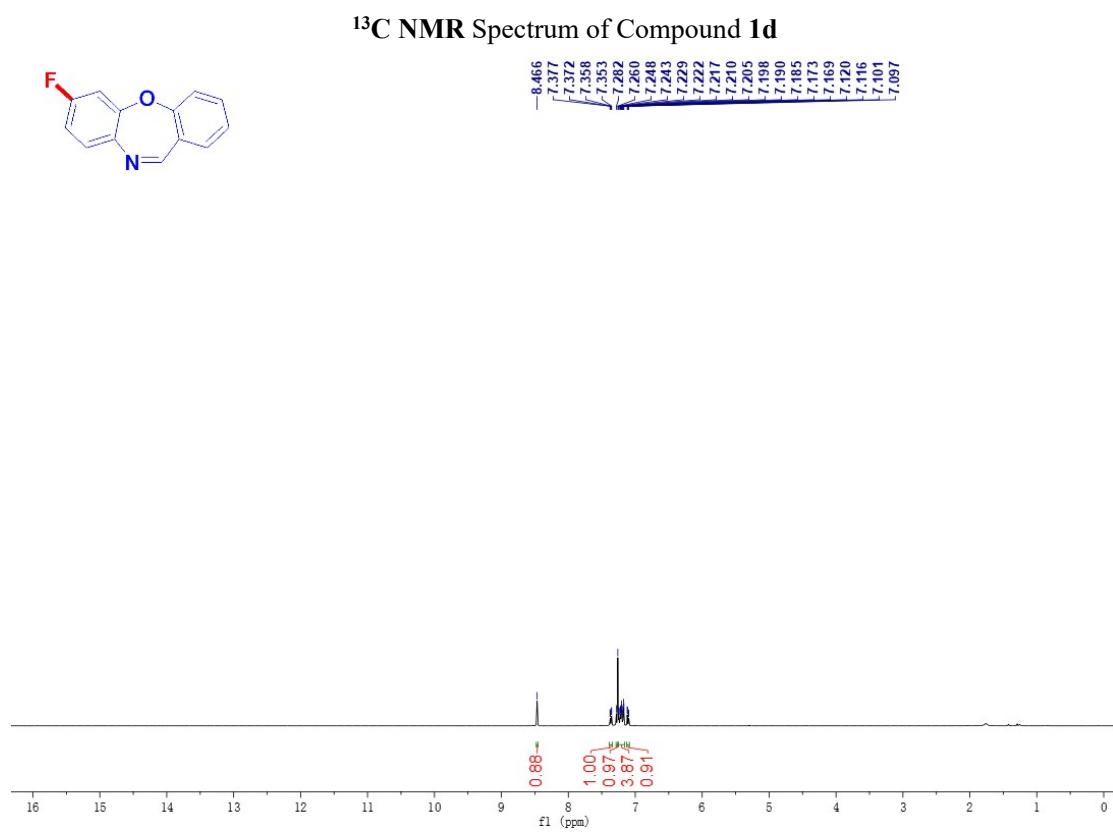

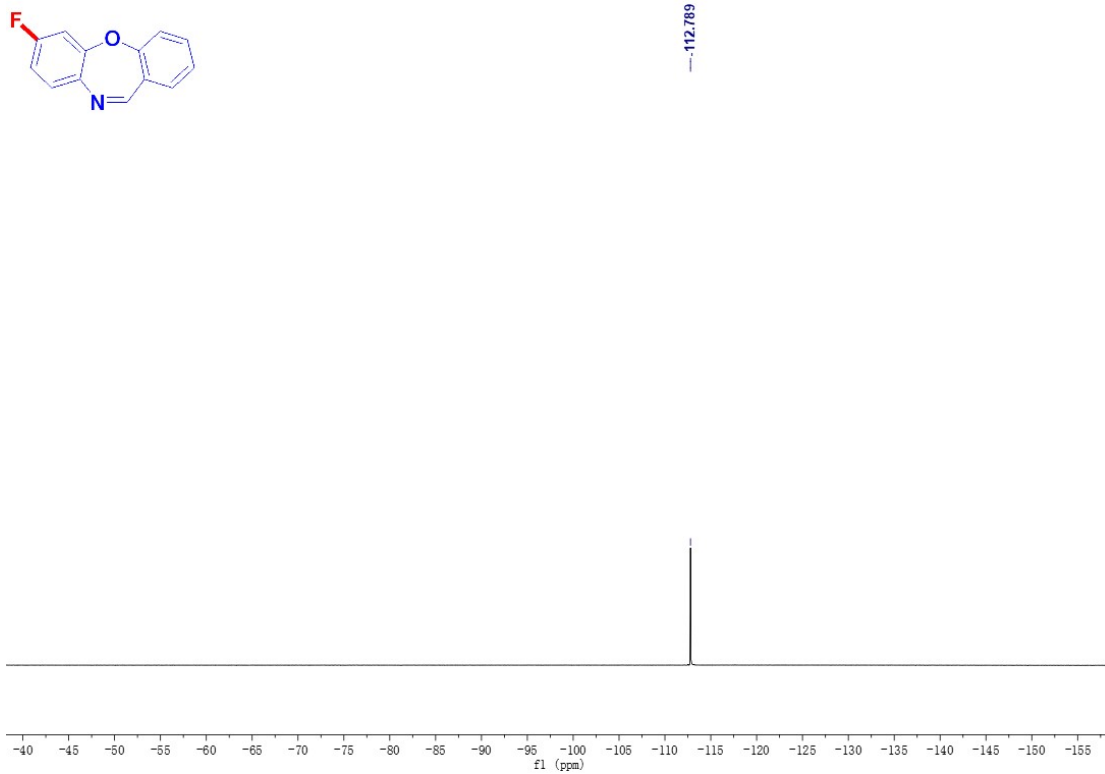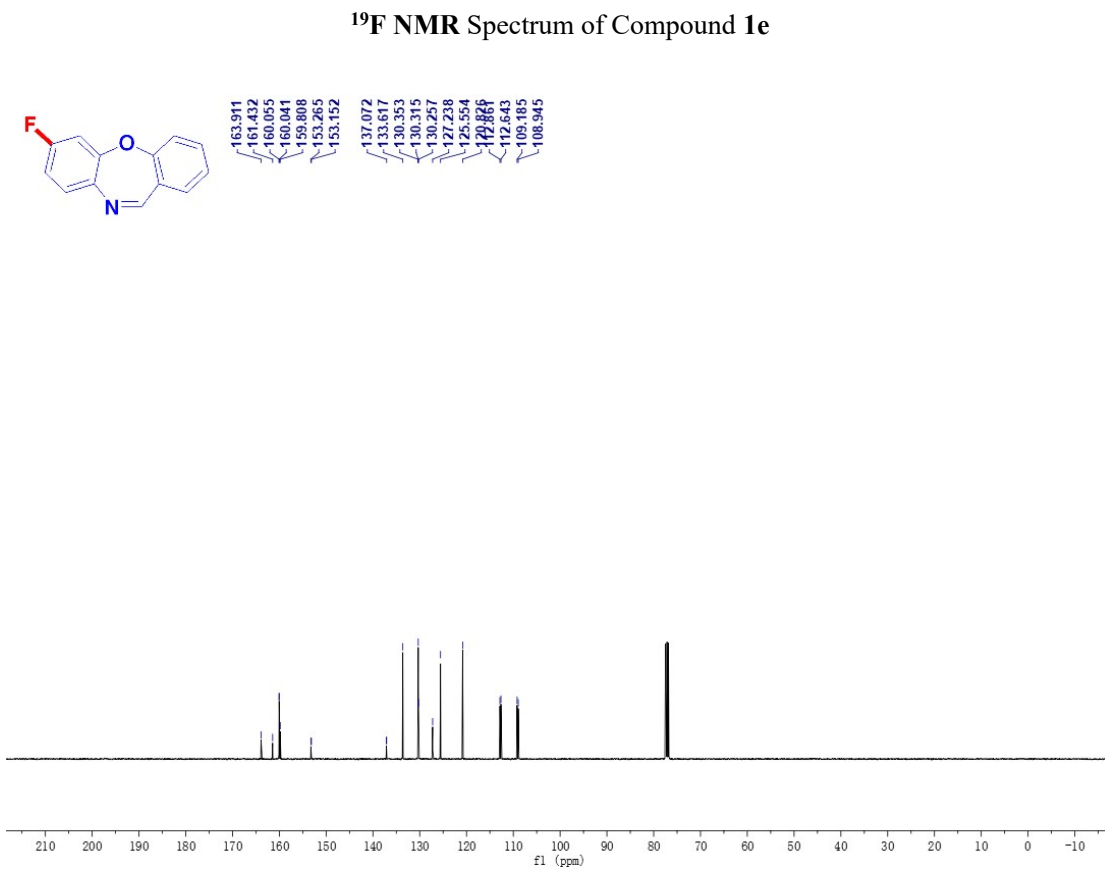

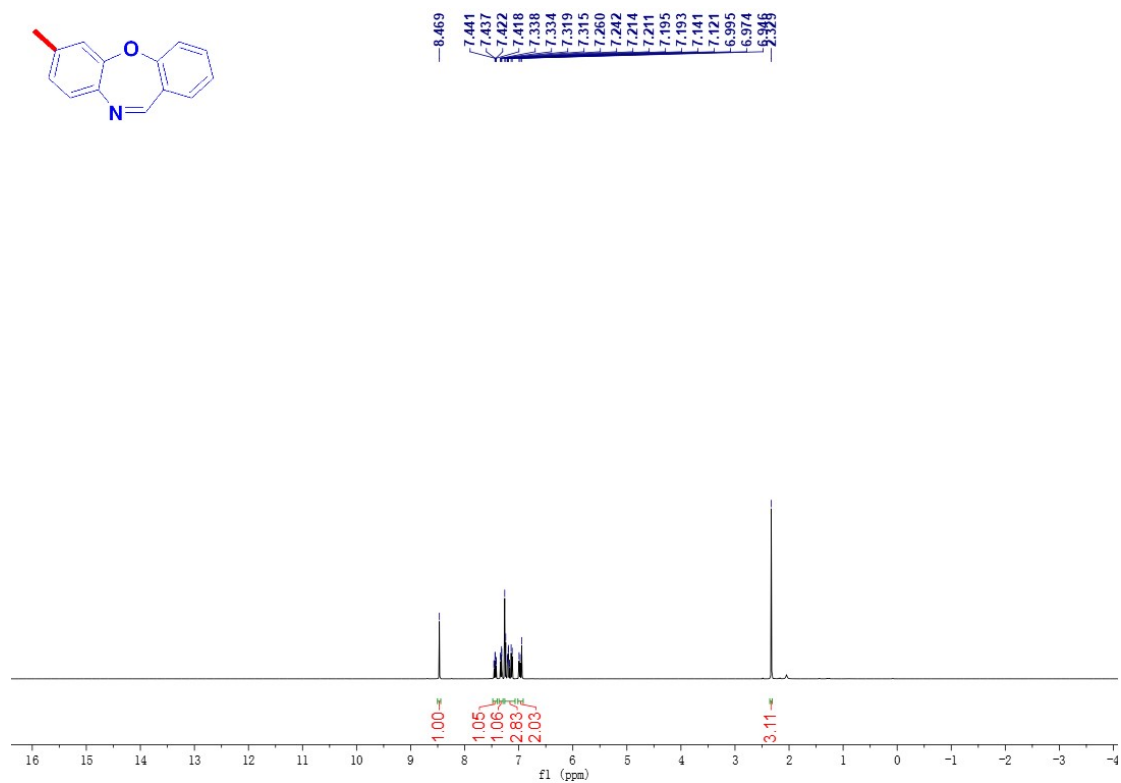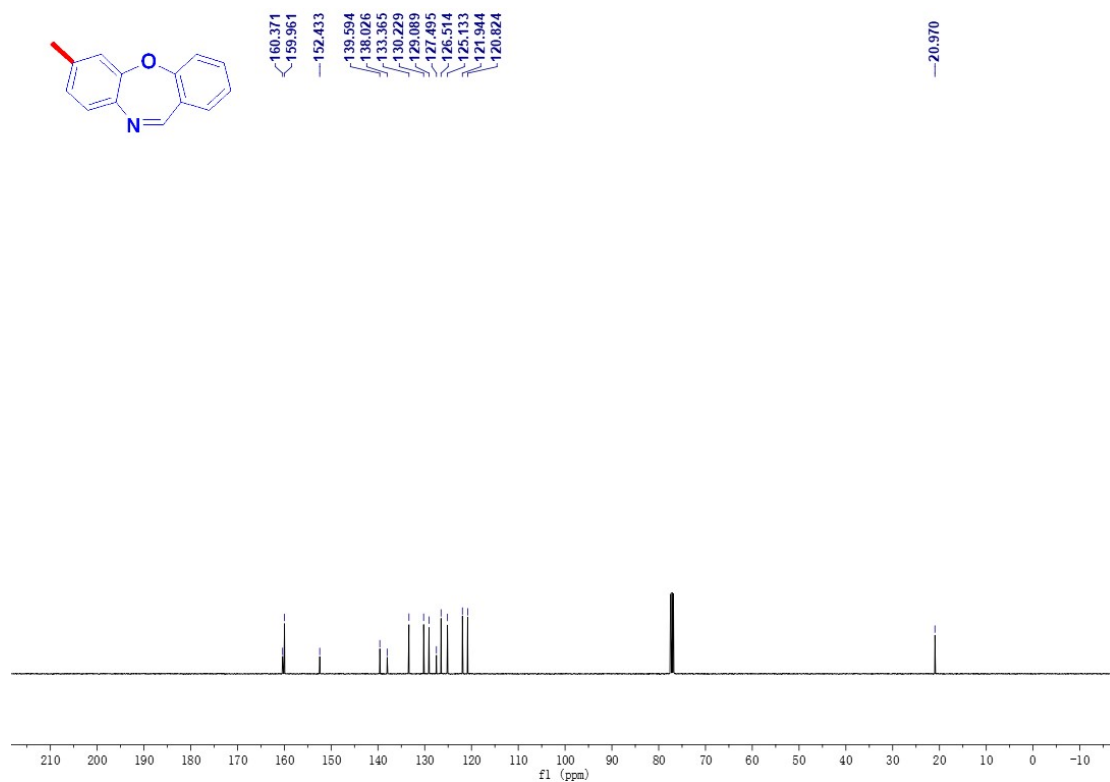



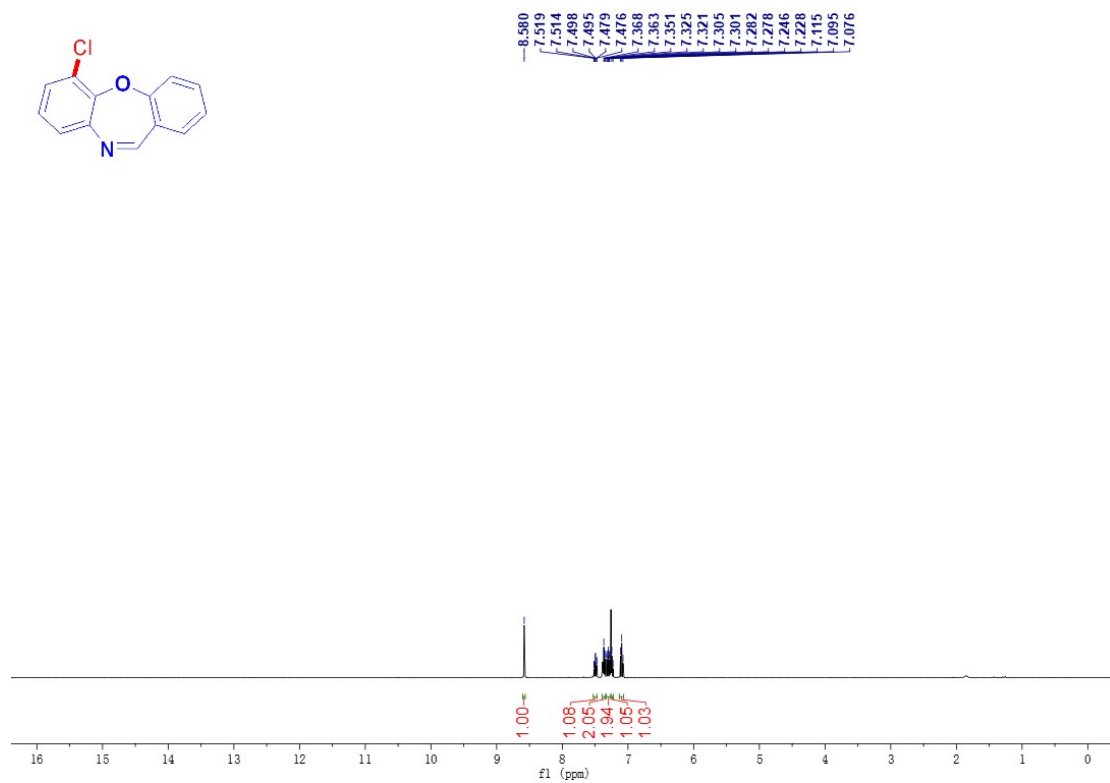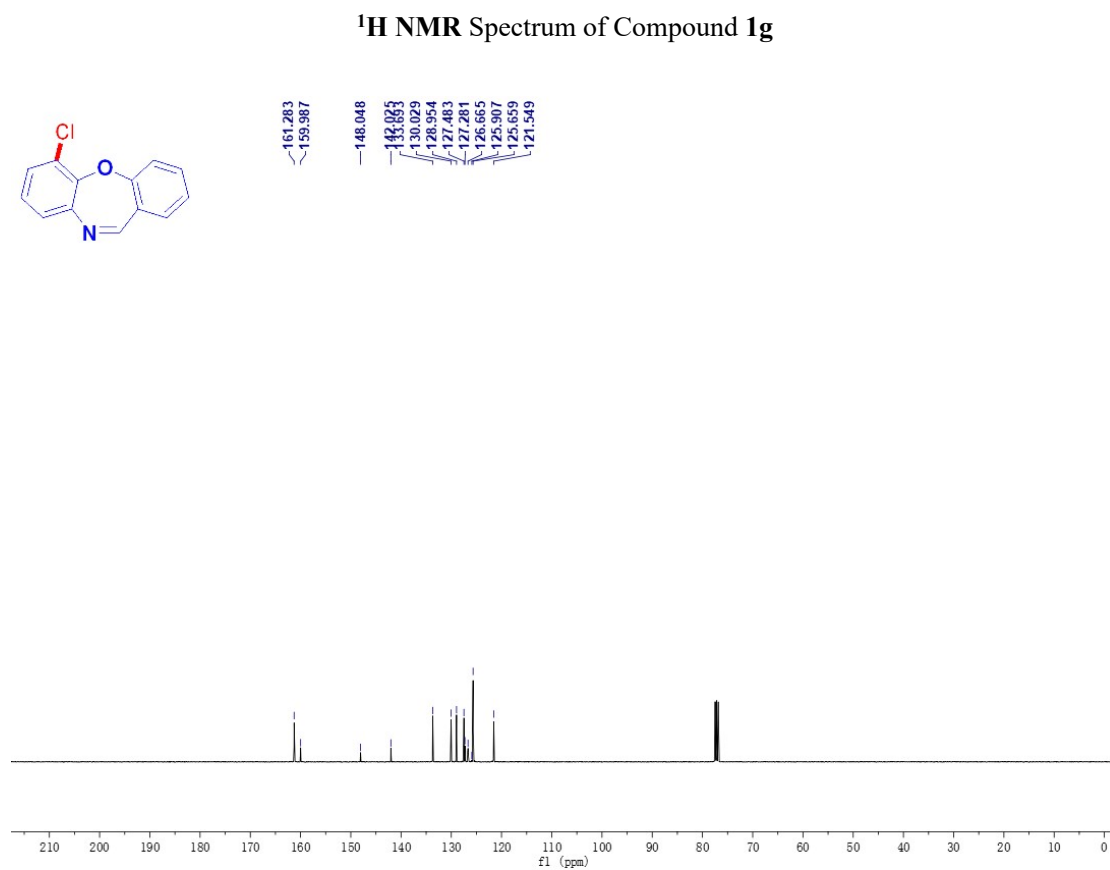

<sup>13</sup>C NMR Spectrum of Compound **1g**

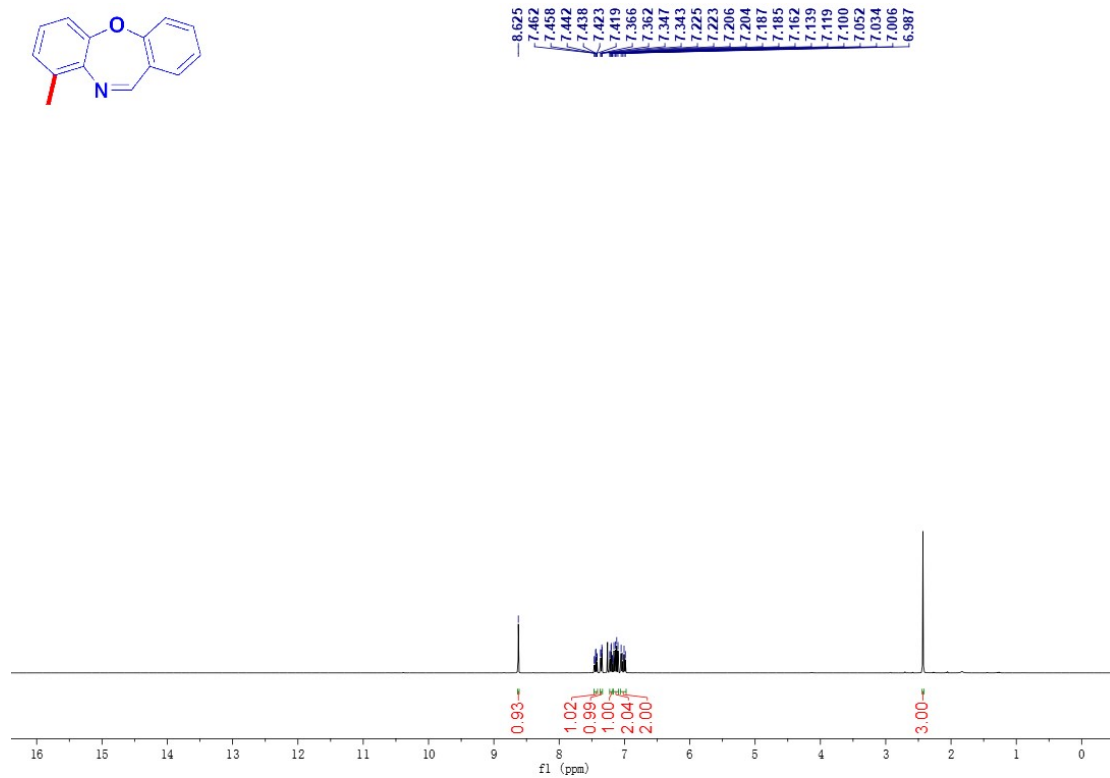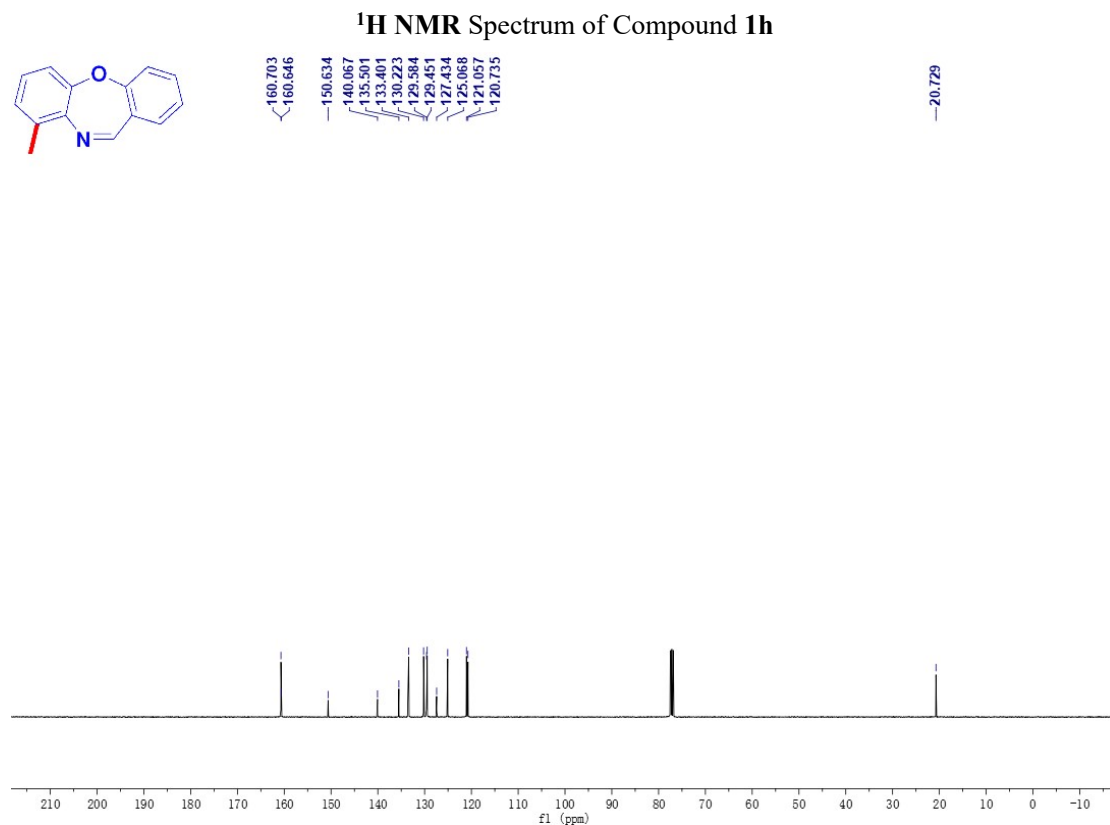

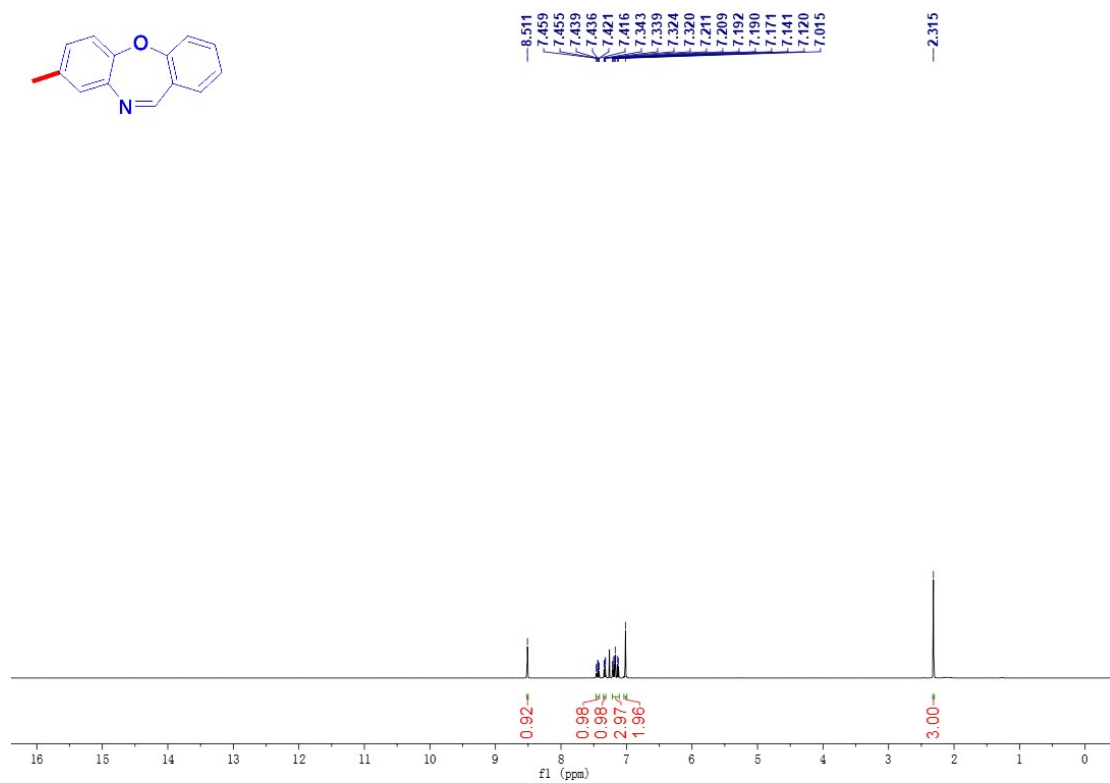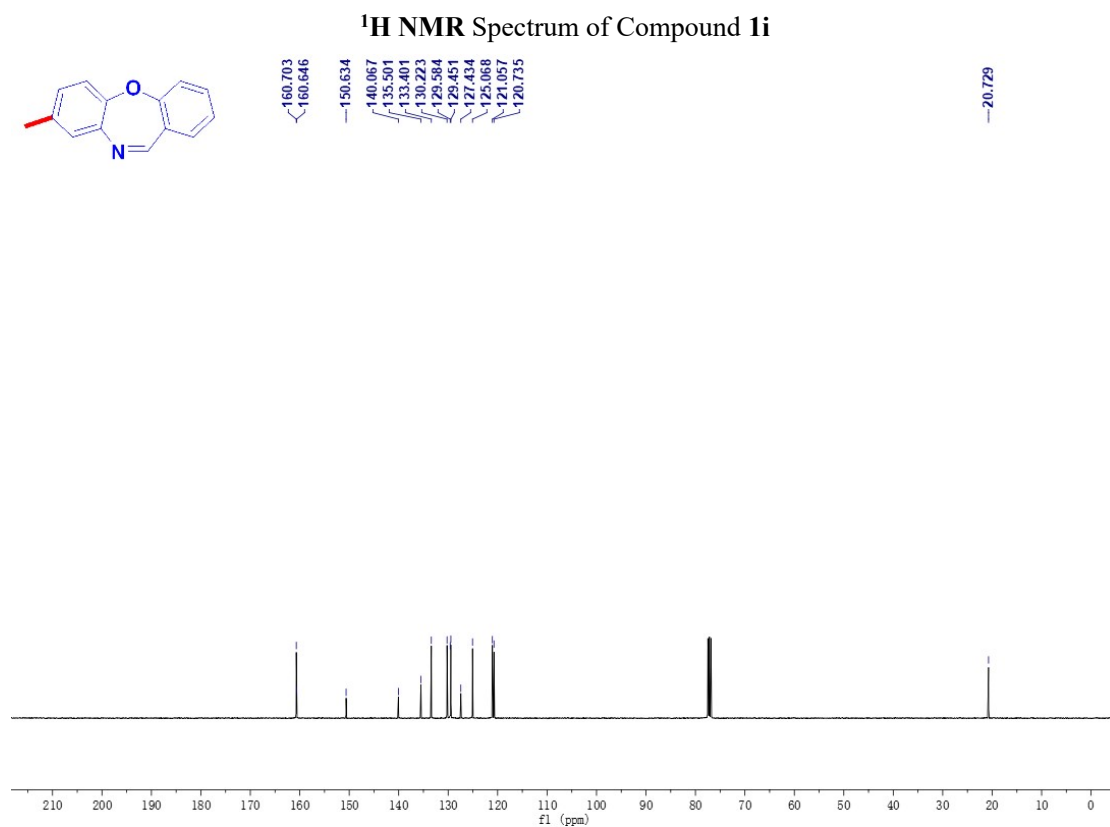

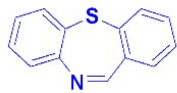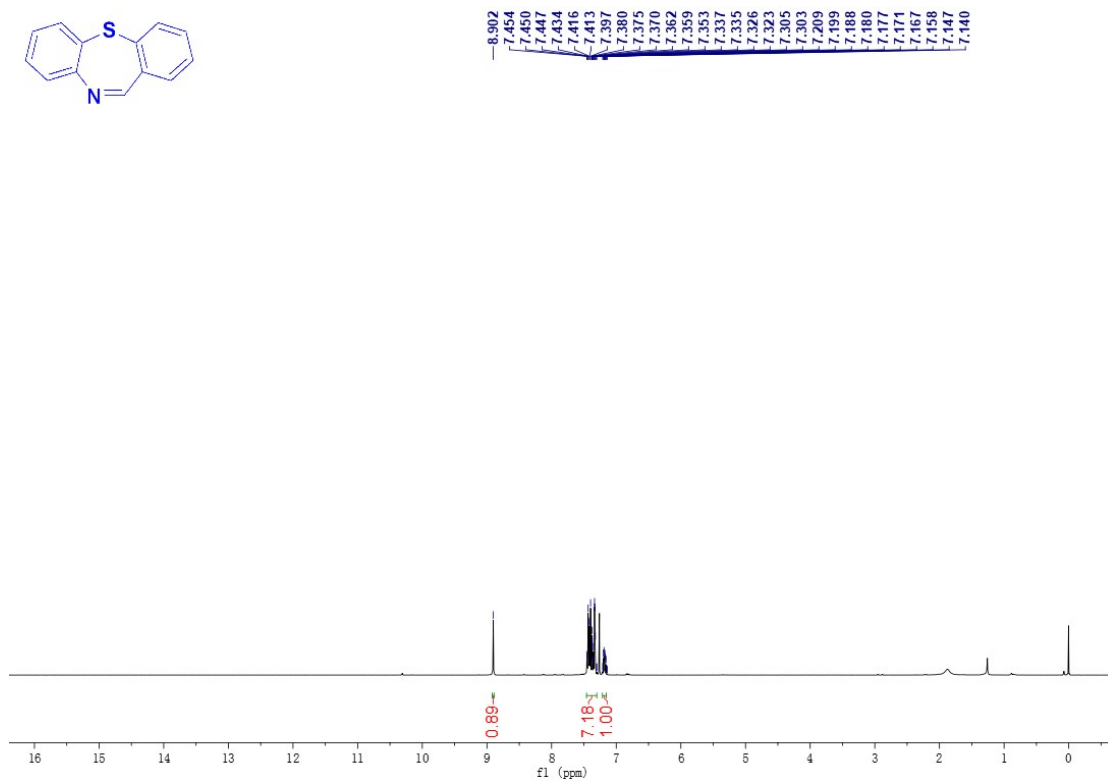

<sup>1</sup>H NMR Spectrum of Compound 1j

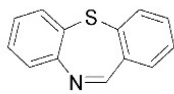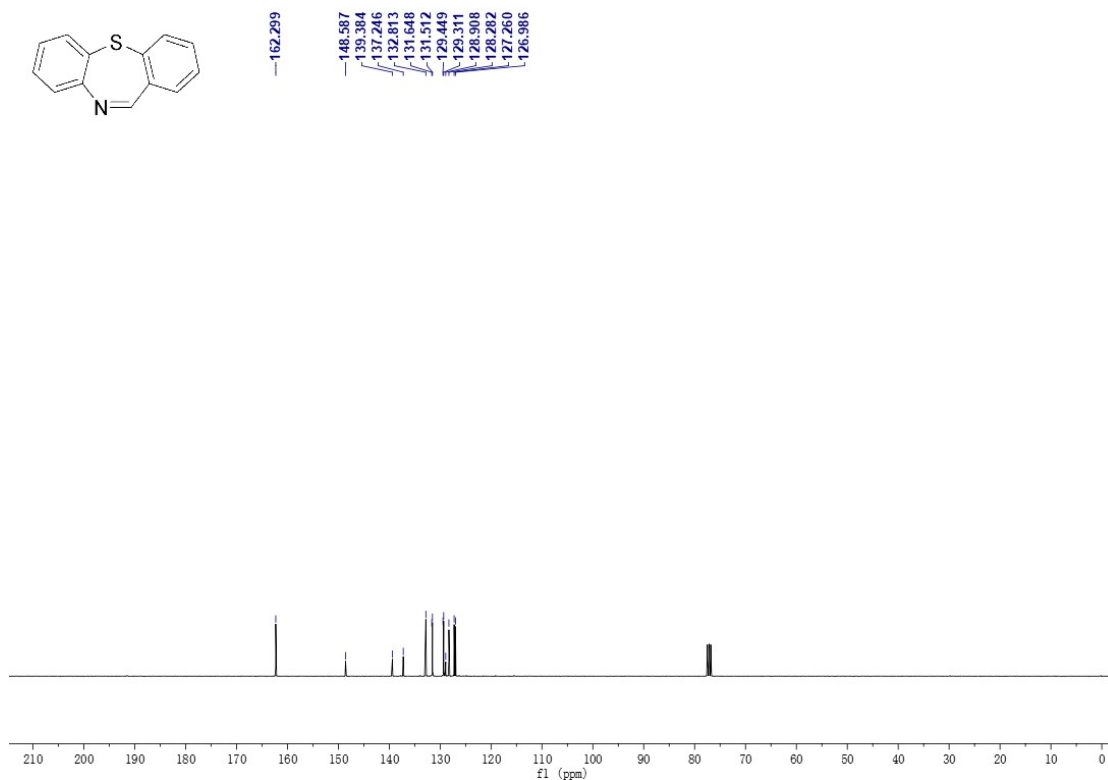

<sup>13</sup>C NMR Spectrum of Compound 1j

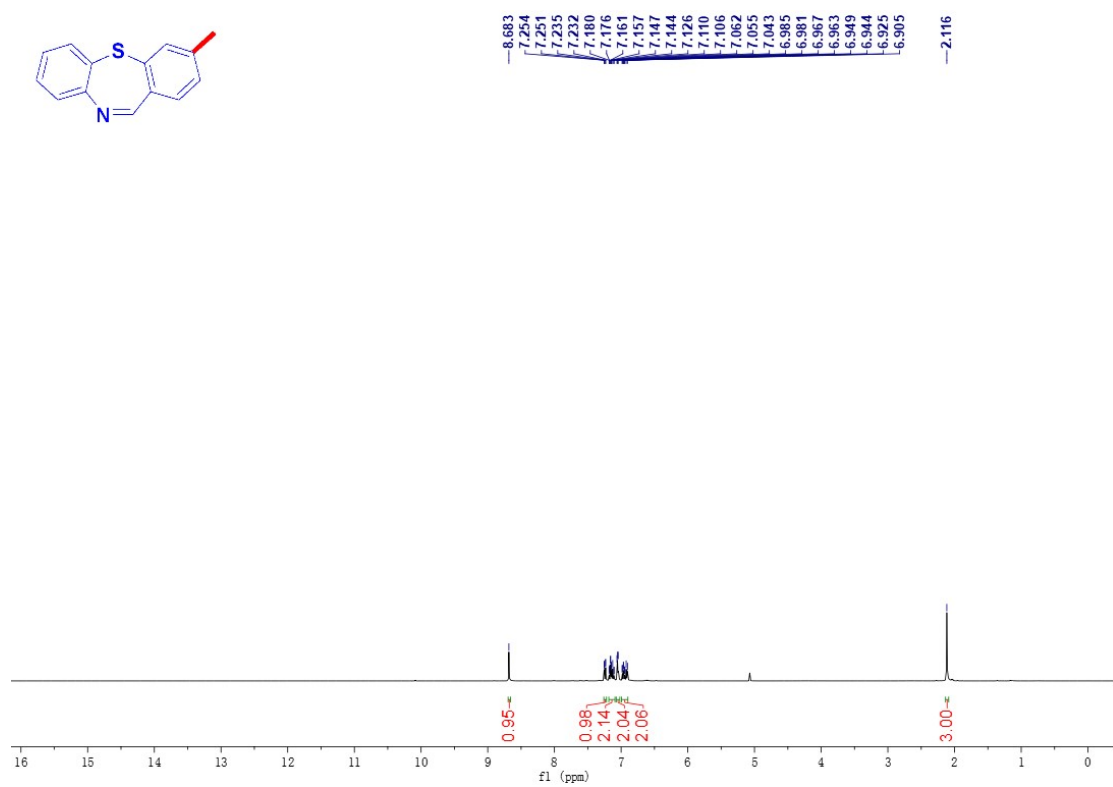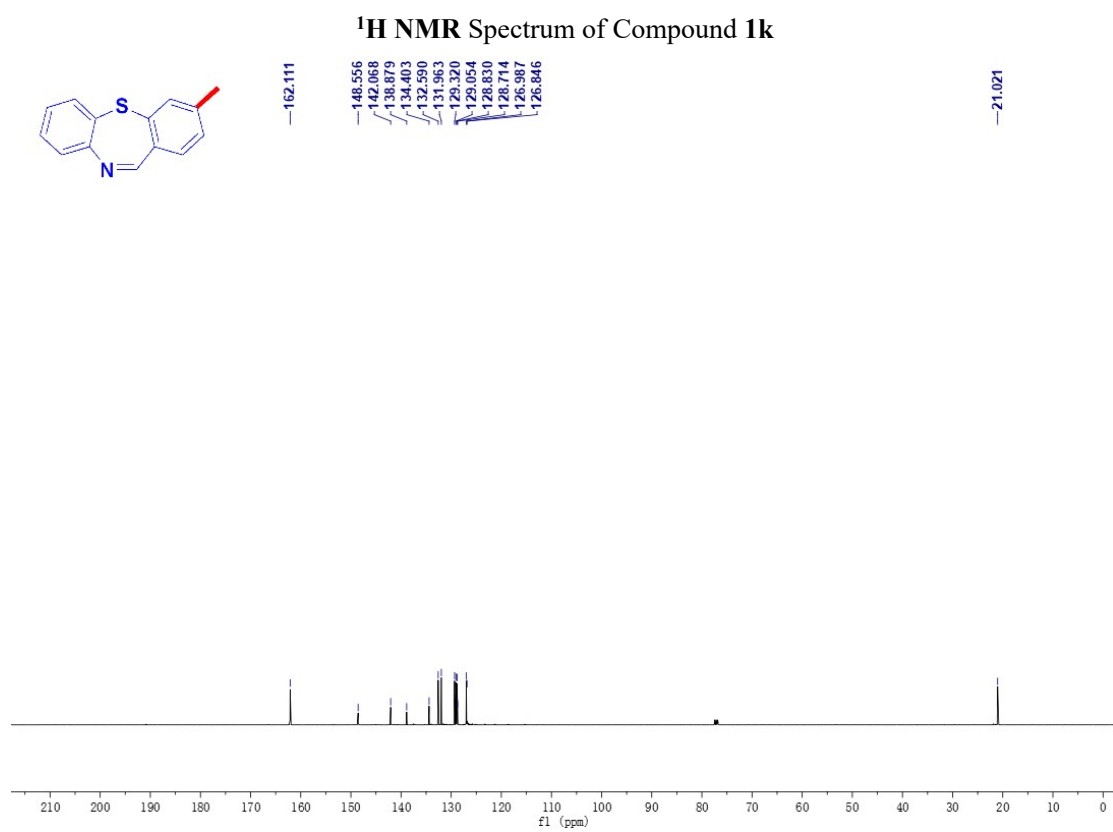

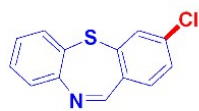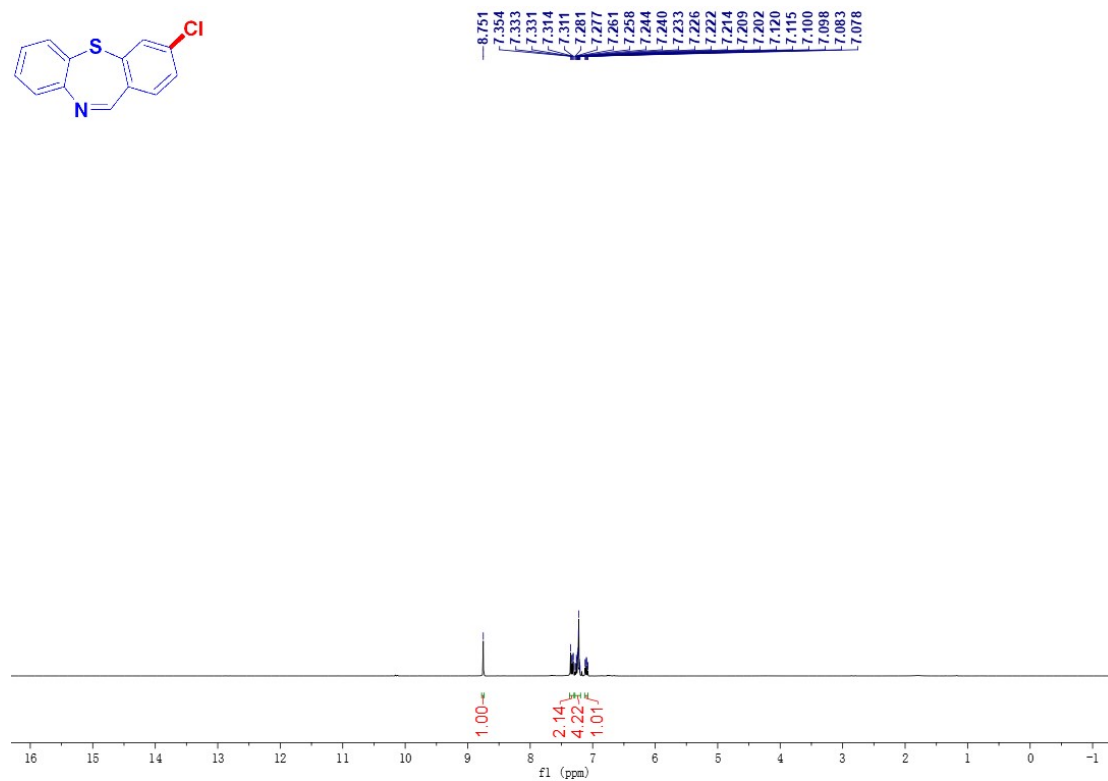

<sup>1</sup>H NMR Spectrum of Compound 11

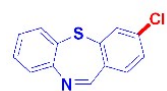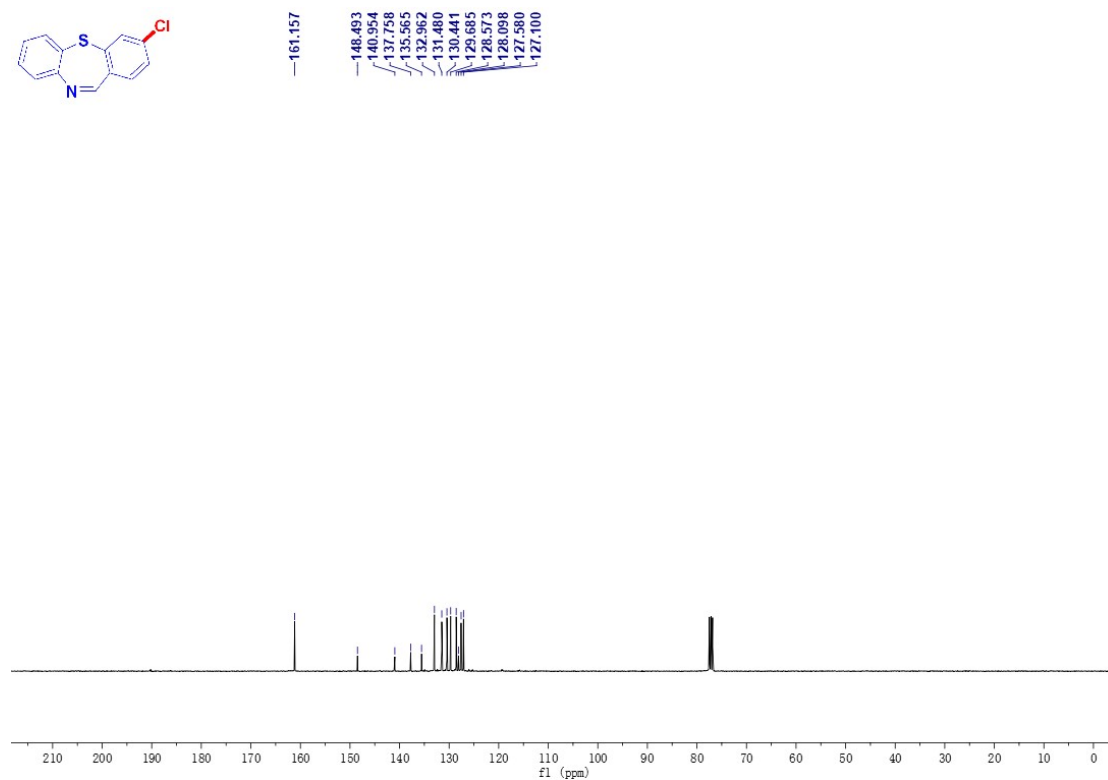

<sup>13</sup>C NMR Spectrum of Compound 11

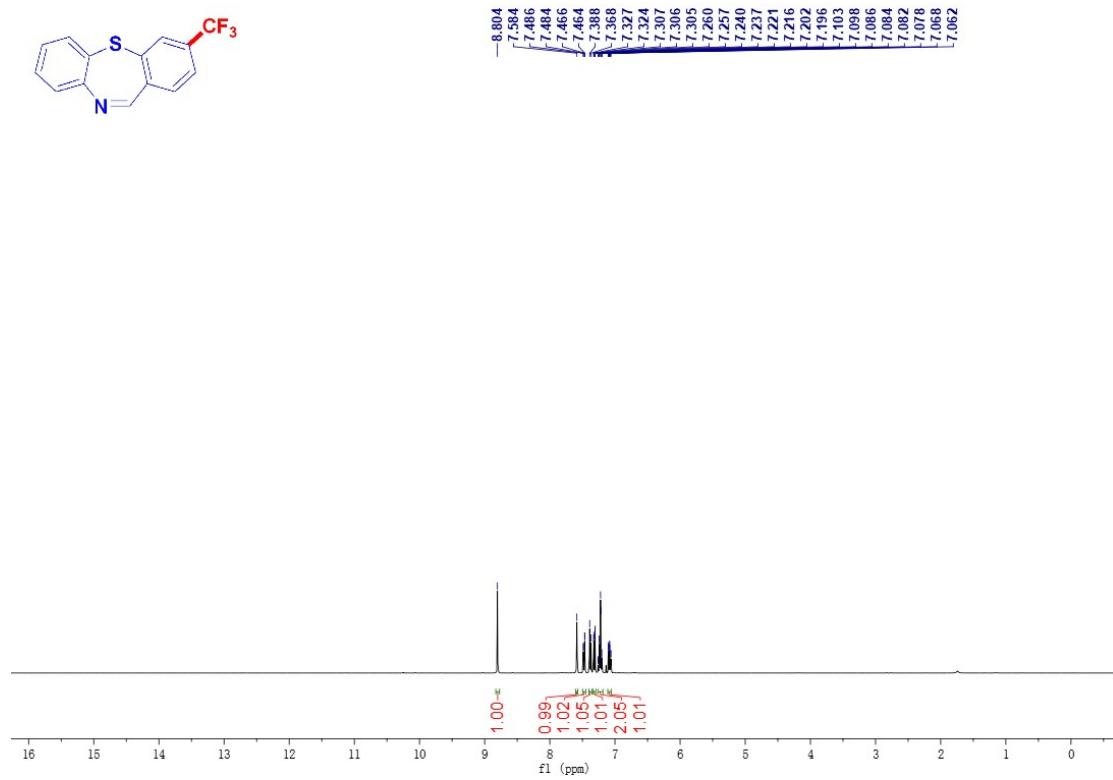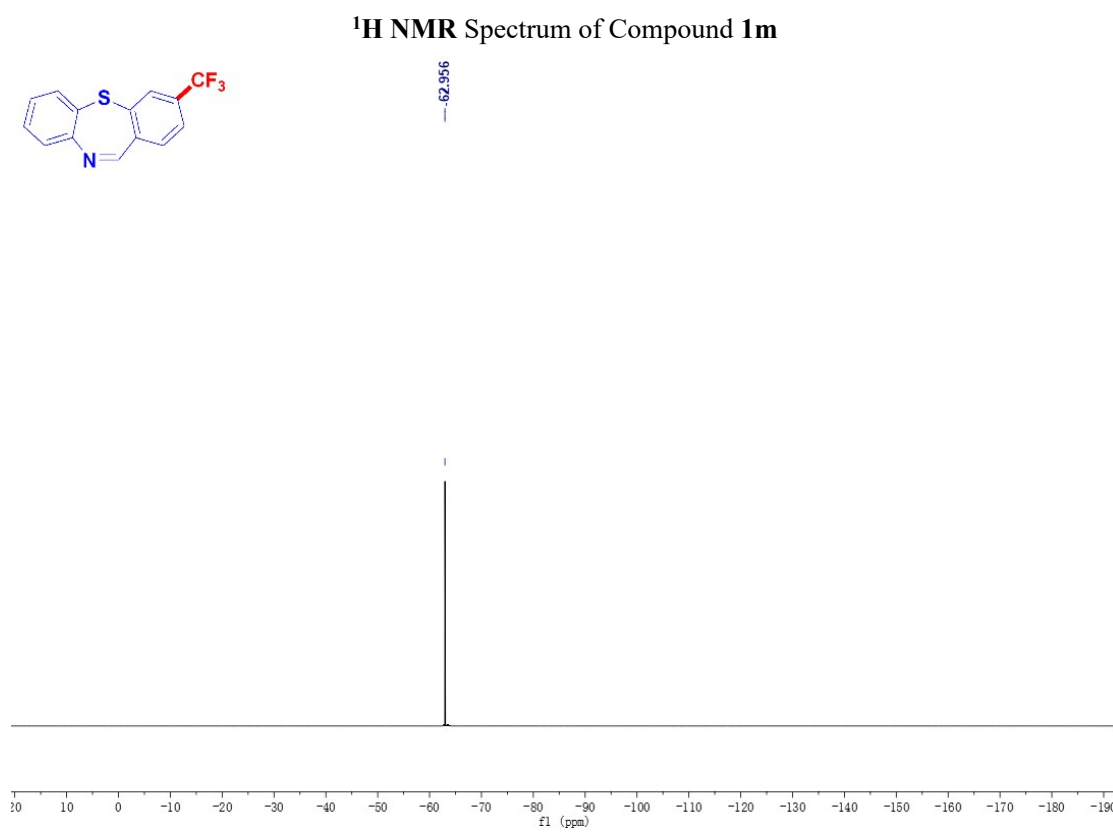

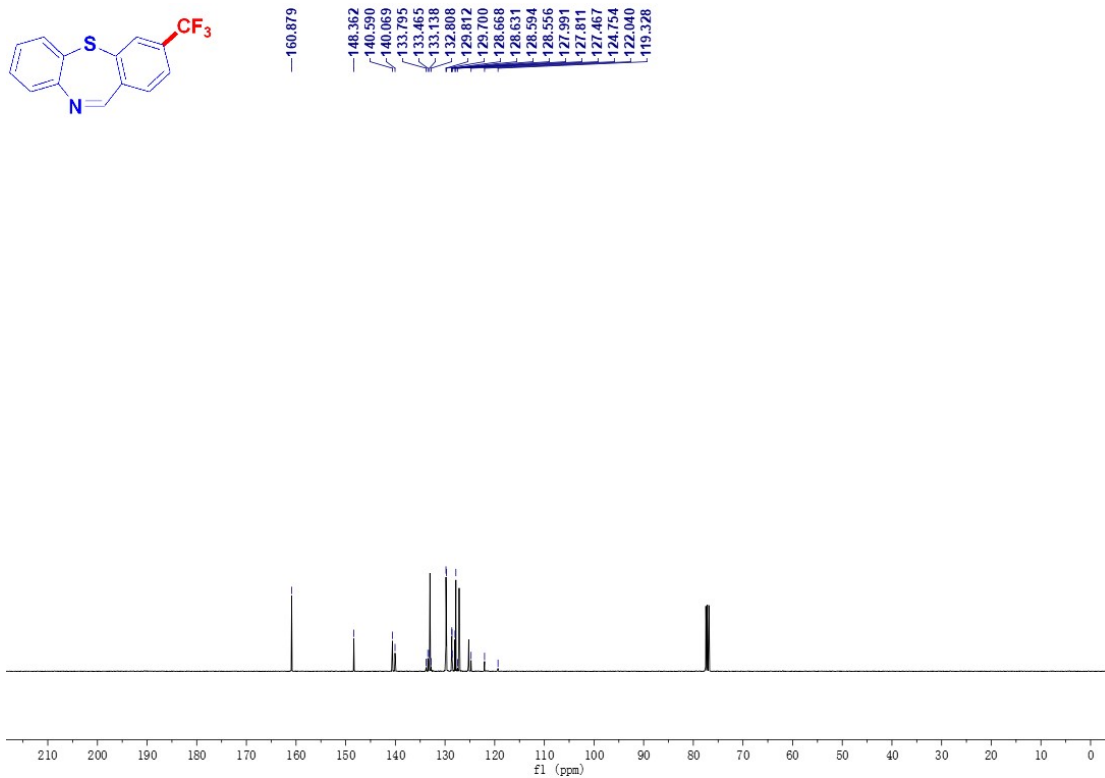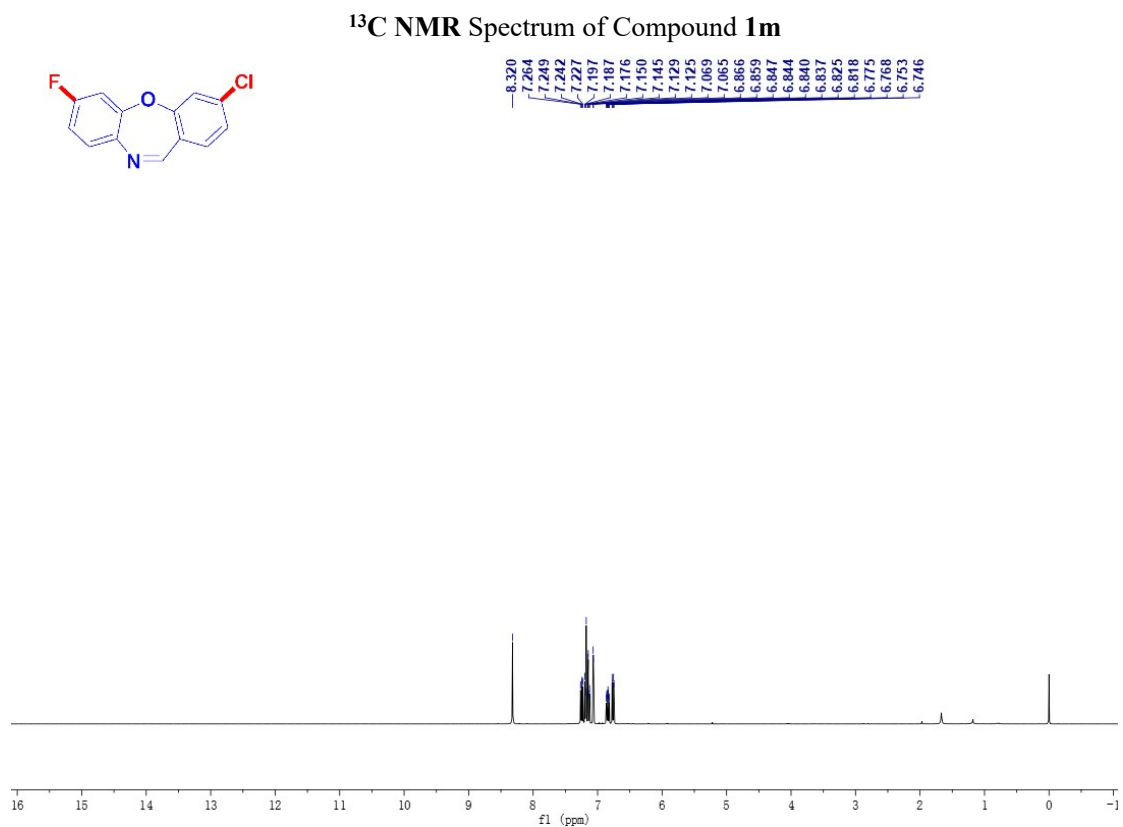



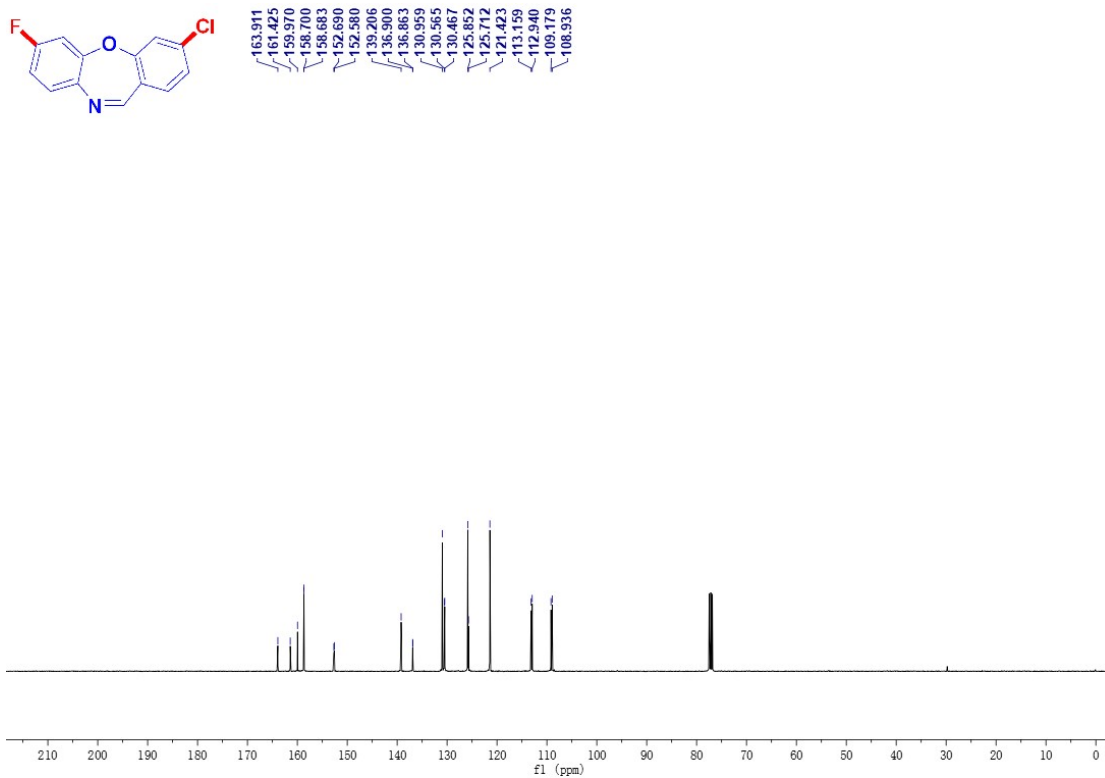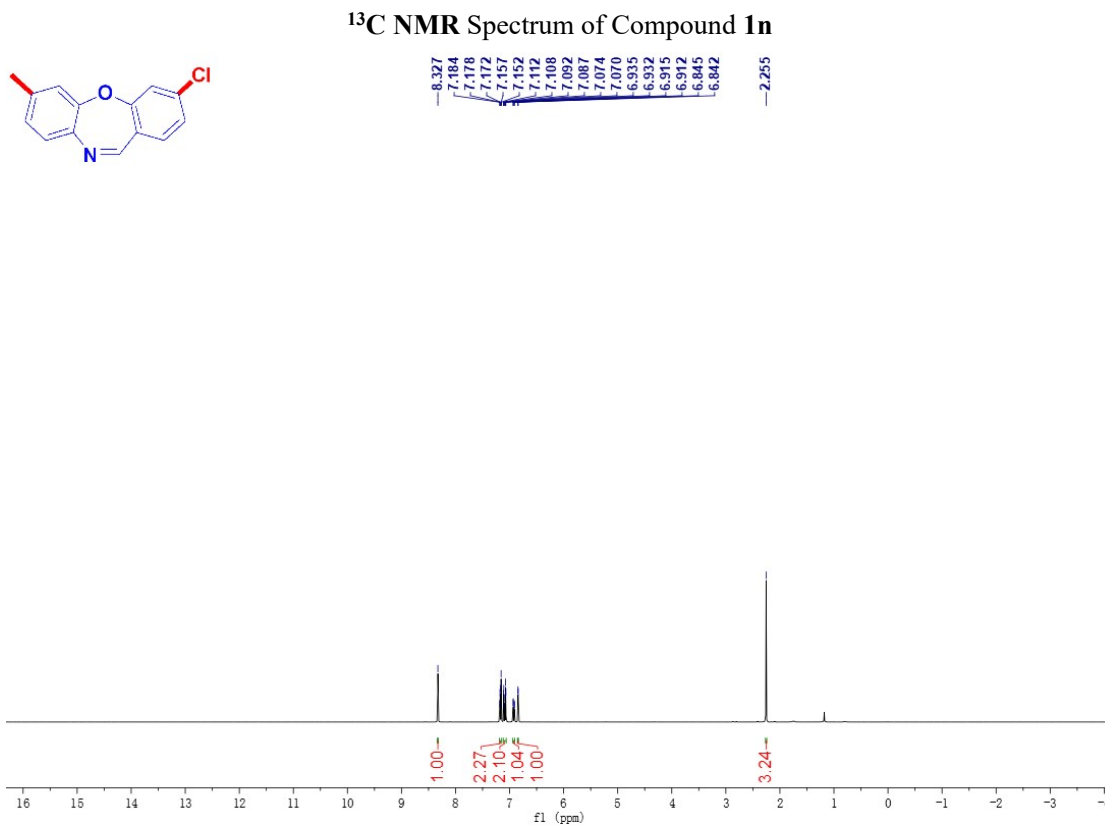

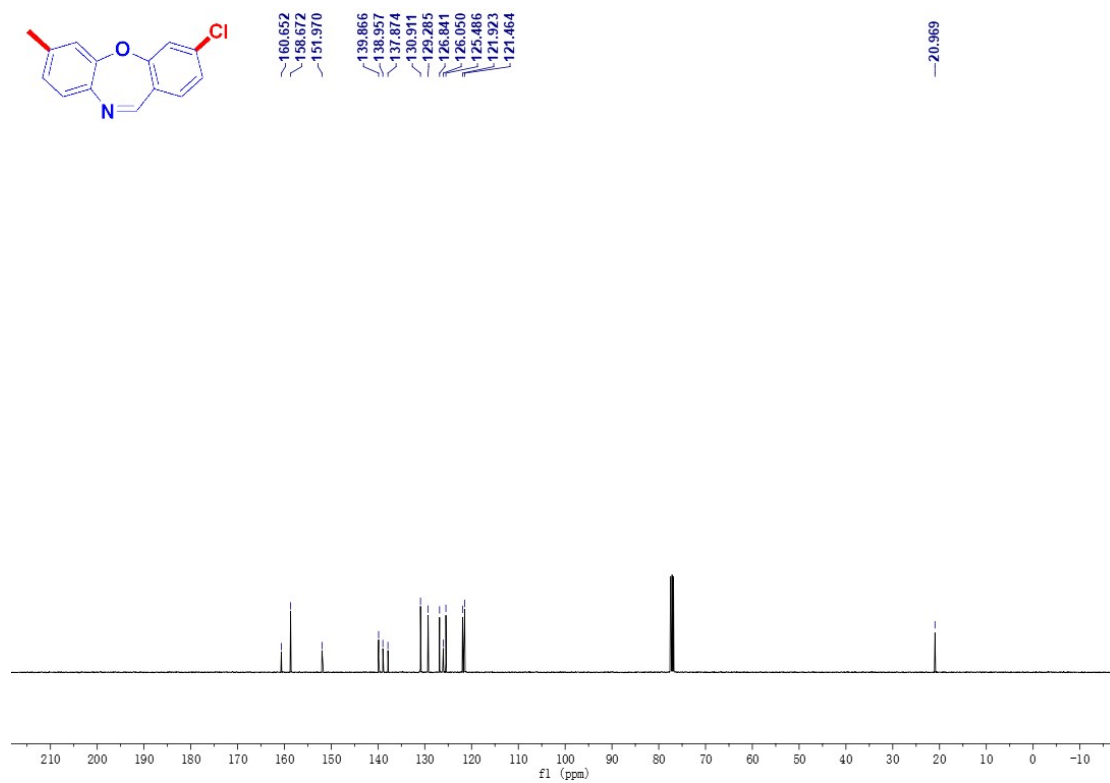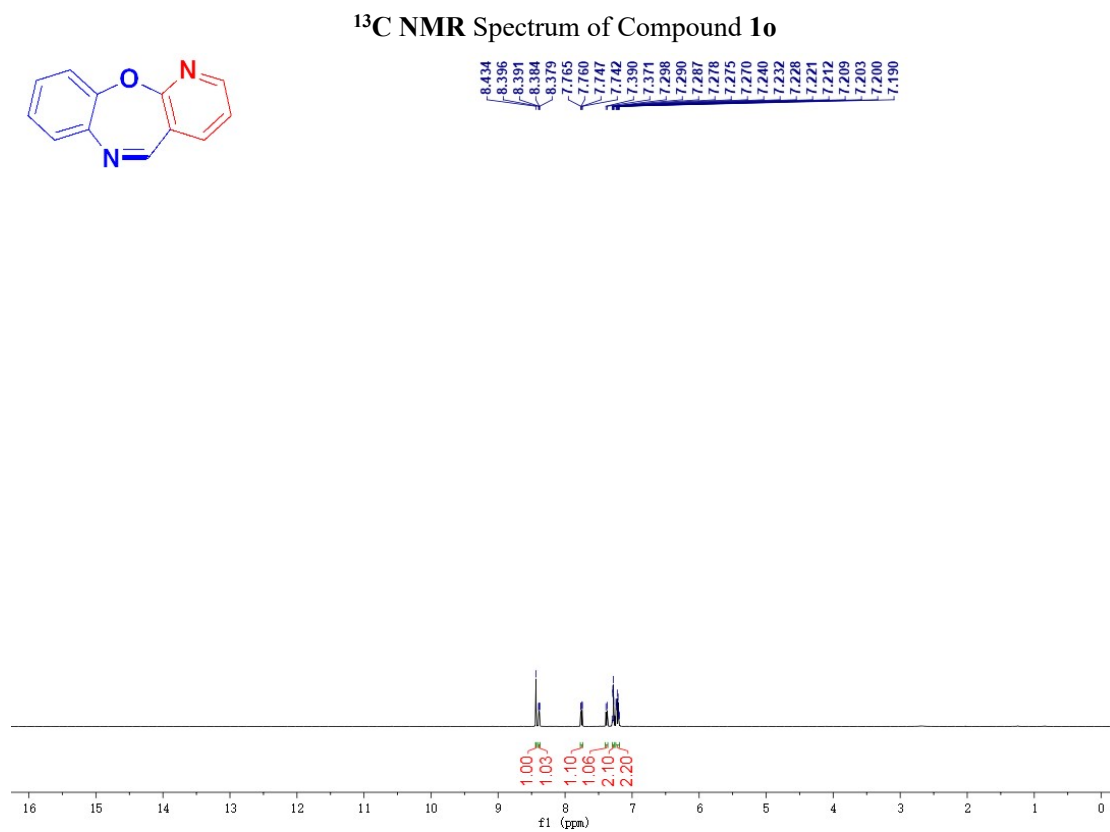

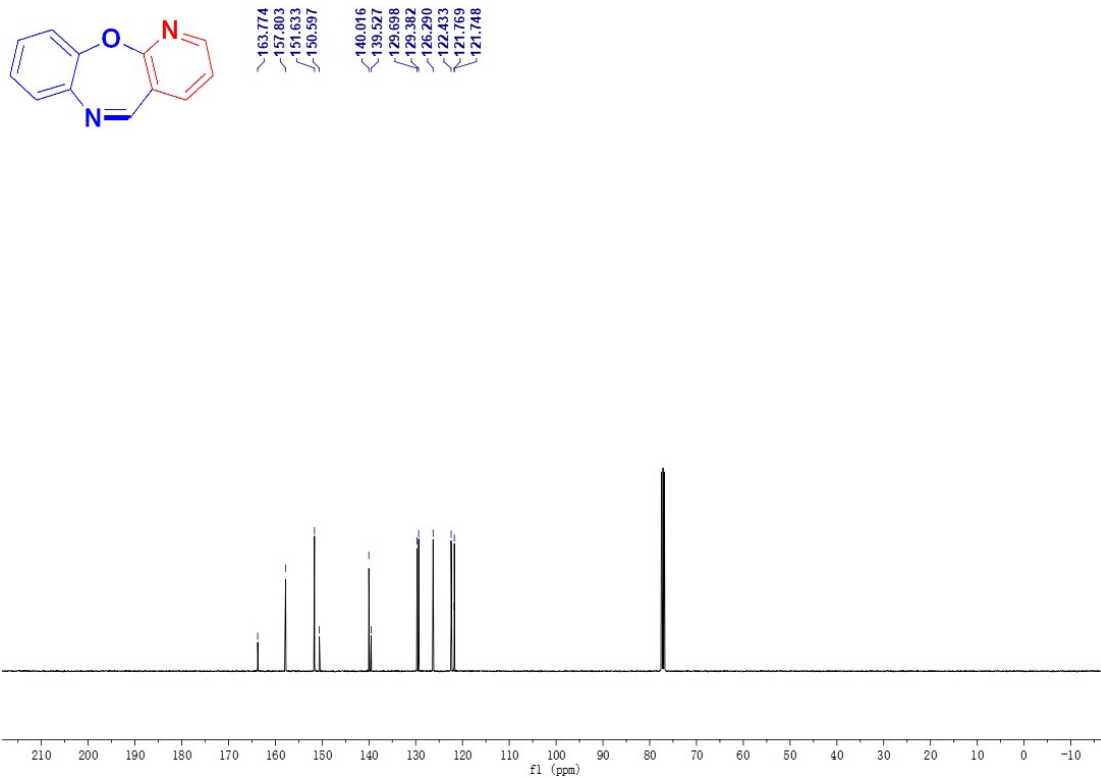

<sup>13</sup>C NMR Spectrum of Compound 1p

Copies of <sup>1</sup>H (400 MHz), <sup>19</sup>F (67 MHz) and <sup>13</sup>C (101 MHz) spectra of products 3a-3q in CDCl<sub>3</sub> or DMSO-d<sub>6</sub>

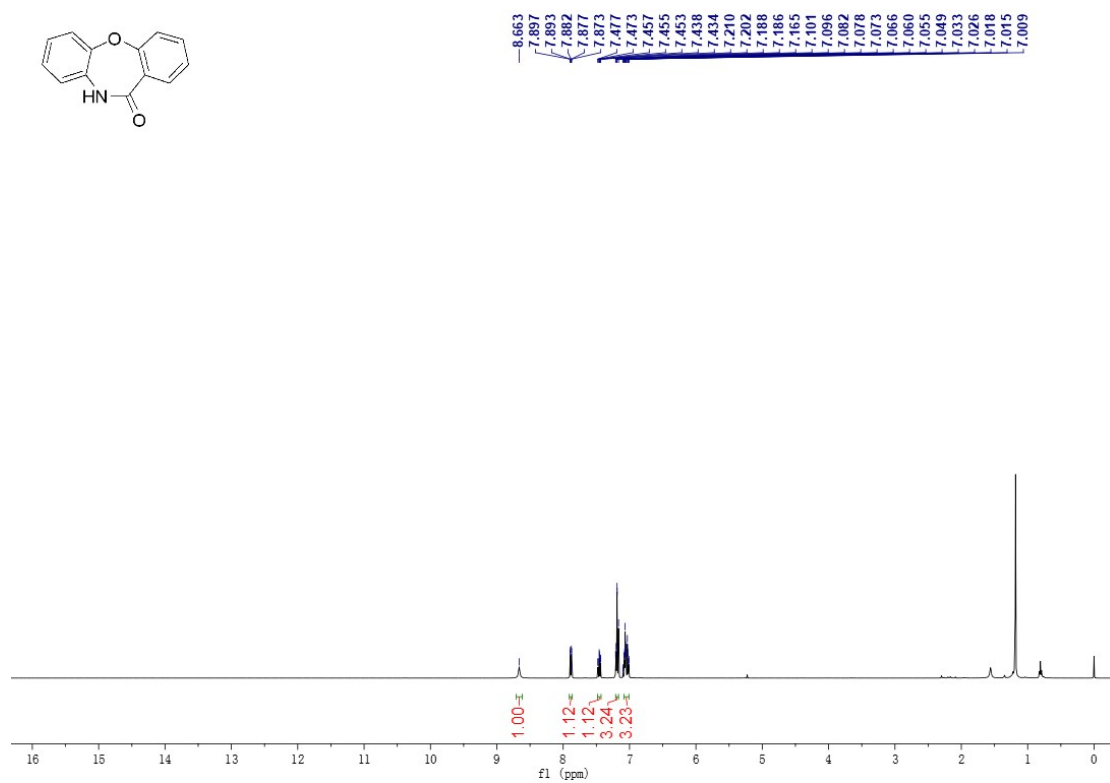

<sup>1</sup>H NMR Spectrum of Compound 3a

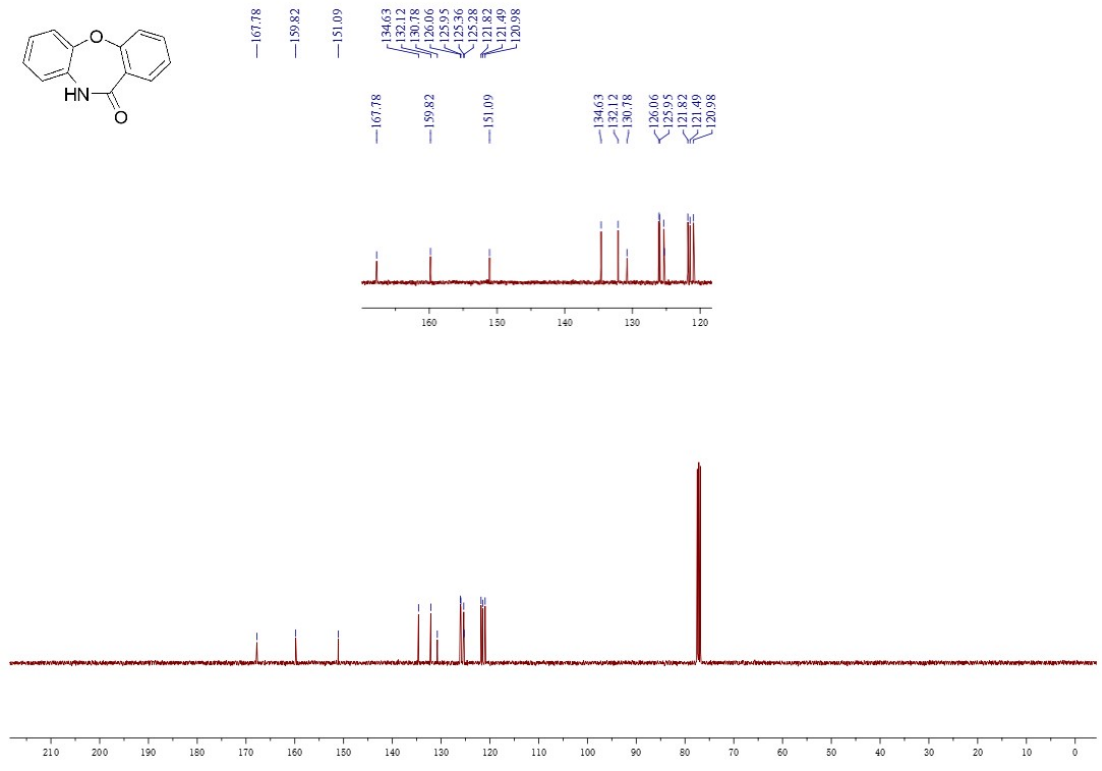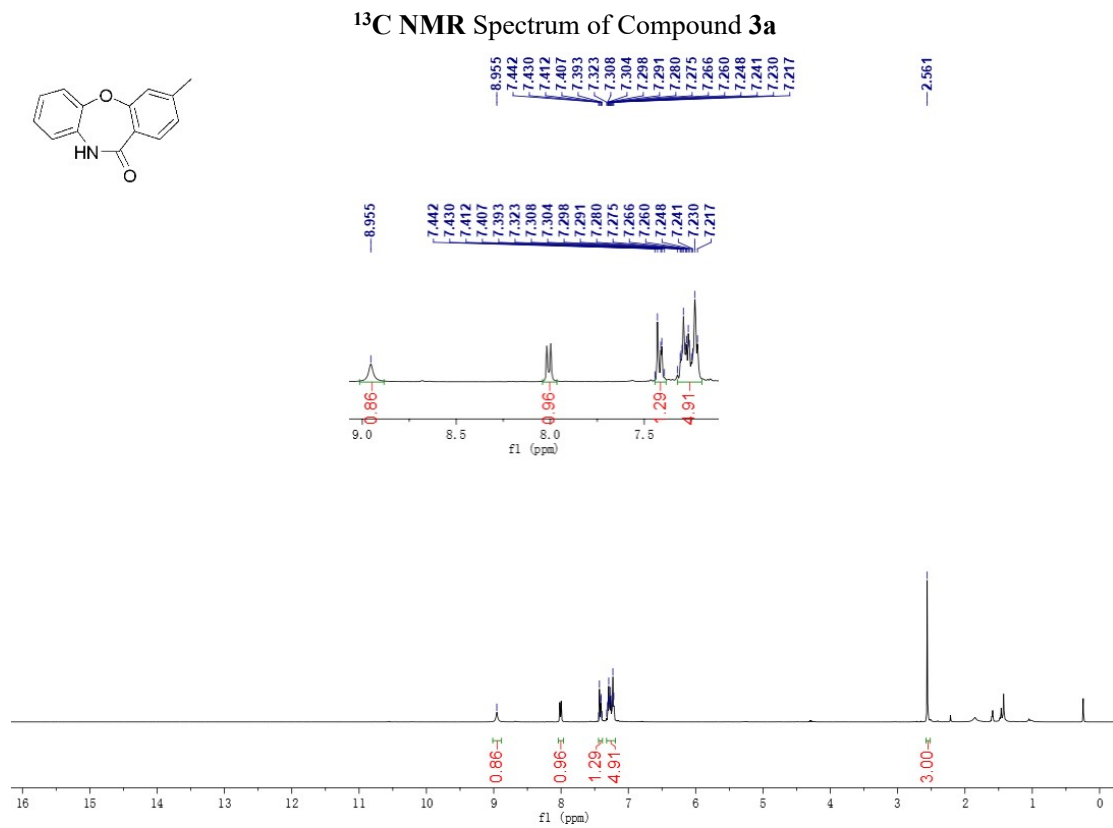

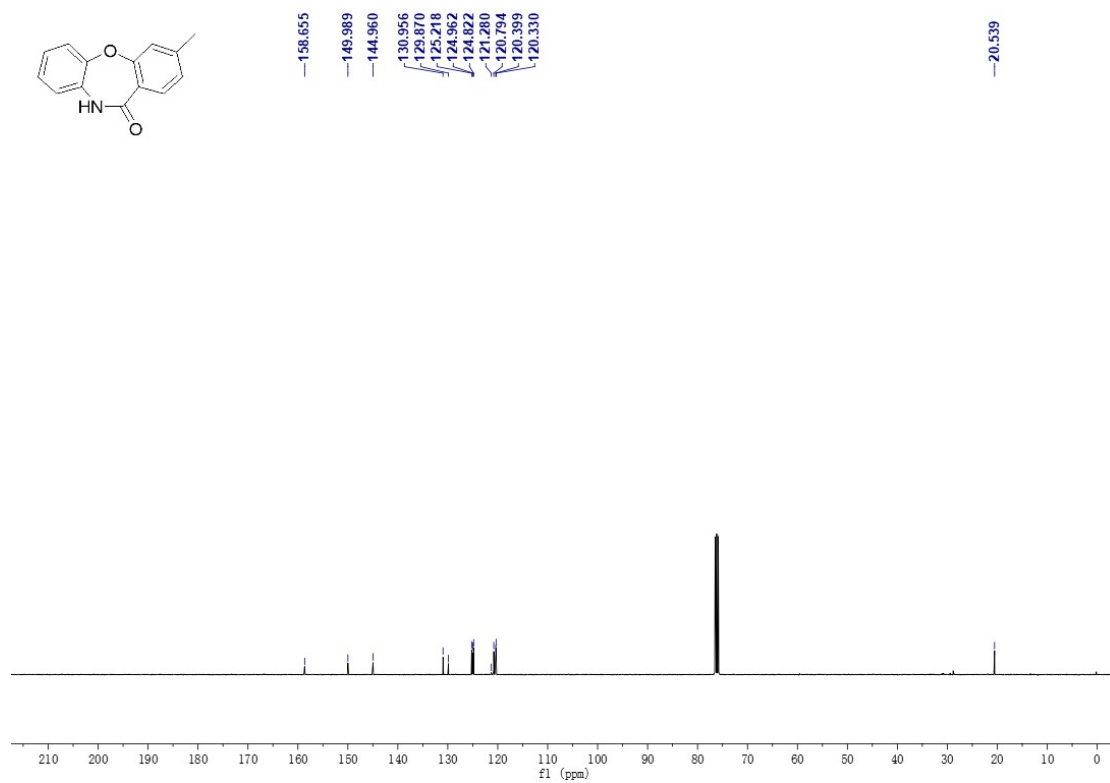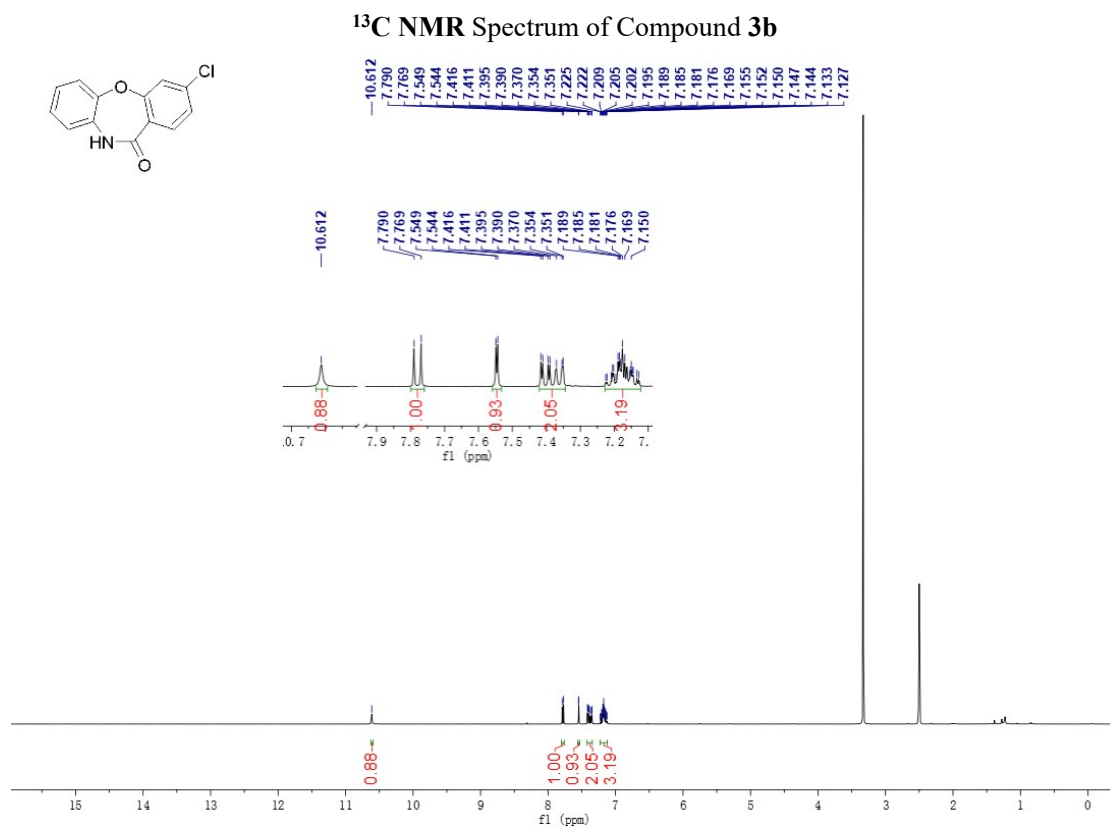

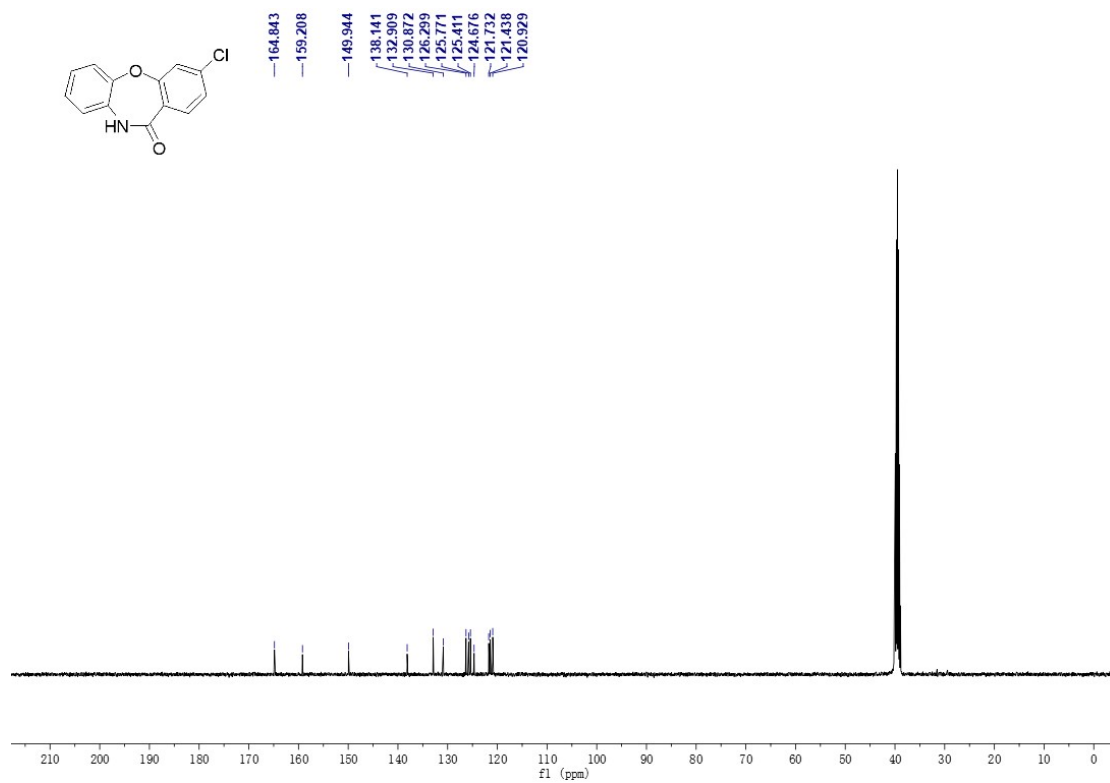

$^{13}\text{C}$  NMR Spectrum of Compound 3c

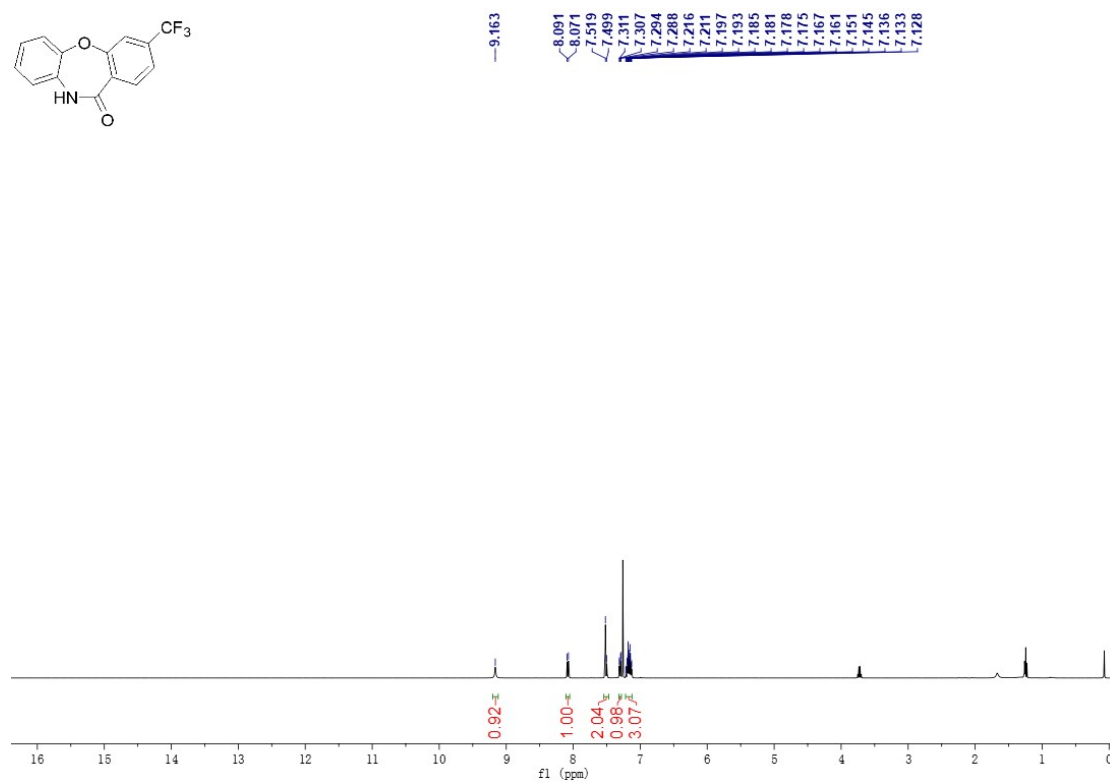

$^1\text{H}$  NMR Spectrum of Compound 3d

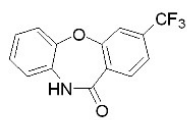

<sup>13</sup>C NMR chemical shifts (ppm):  
 164.618, 158.921, 150.065, 134.428, 134.104, 133.780, 133.456, 132.809, 130.694, 129.374, 127.195, 126.383, 125.542, 124.484, 122.104, 122.068, 121.851, 121.771, 121.509, 119.060, 118.153, 118.116

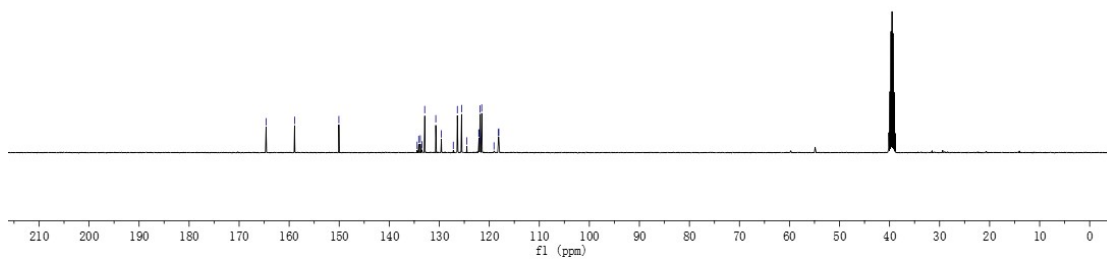

<sup>13</sup>C NMR Spectrum of Compound 3d

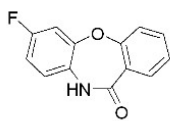

<sup>13</sup>C NMR chemical shifts (ppm):  
 8.163, 7.984, 7.979, 7.964, 7.960, 7.492, 7.488, 7.472, 7.470, 7.454, 7.450, 7.229, 7.227, 7.208, 7.171, 7.150, 7.133, 6.961, 6.954, 6.940, 6.832, 6.819, 6.832, 6.825, 6.812, 6.805, 6.790, 6.784

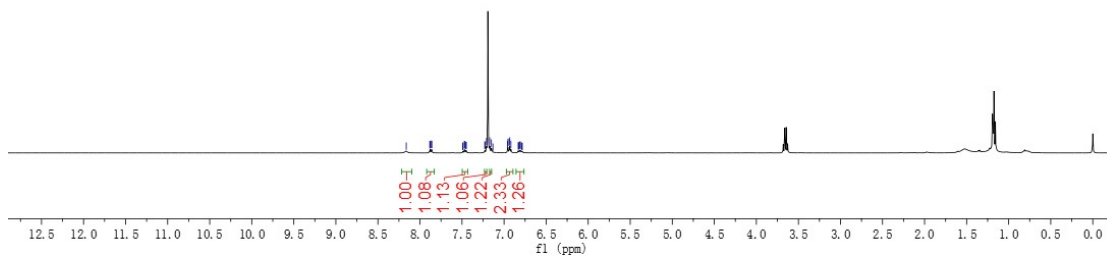

<sup>1</sup>H NMR Spectrum of Compound 3e

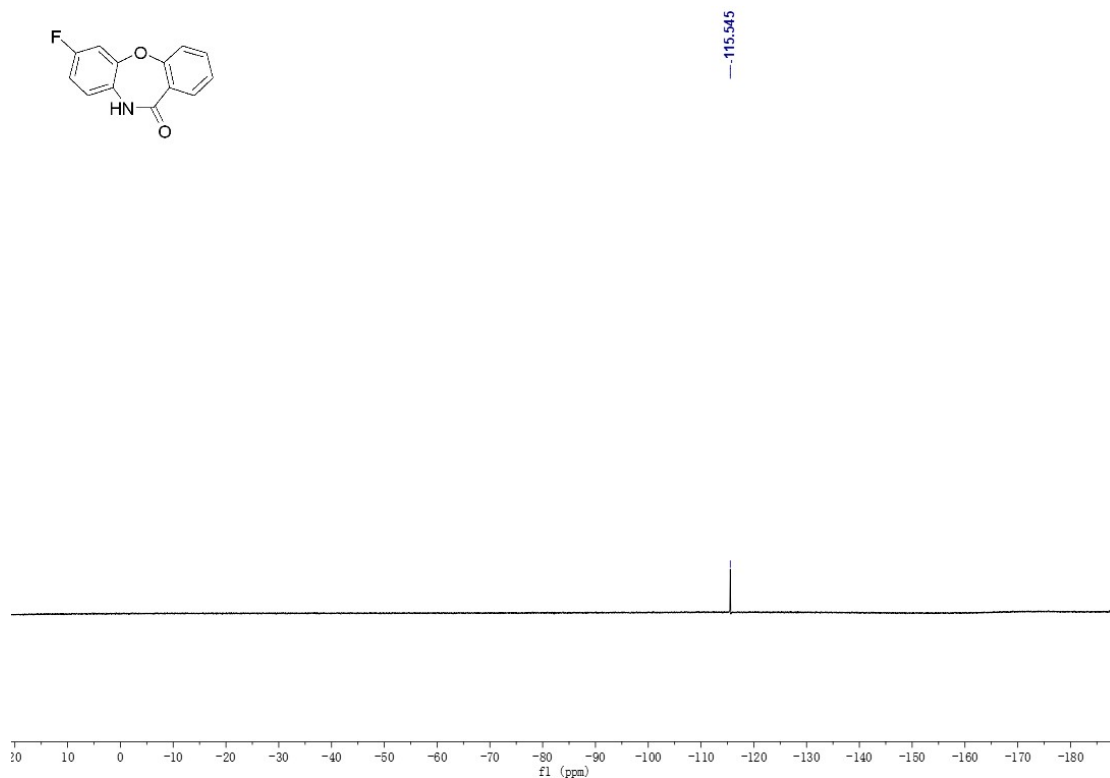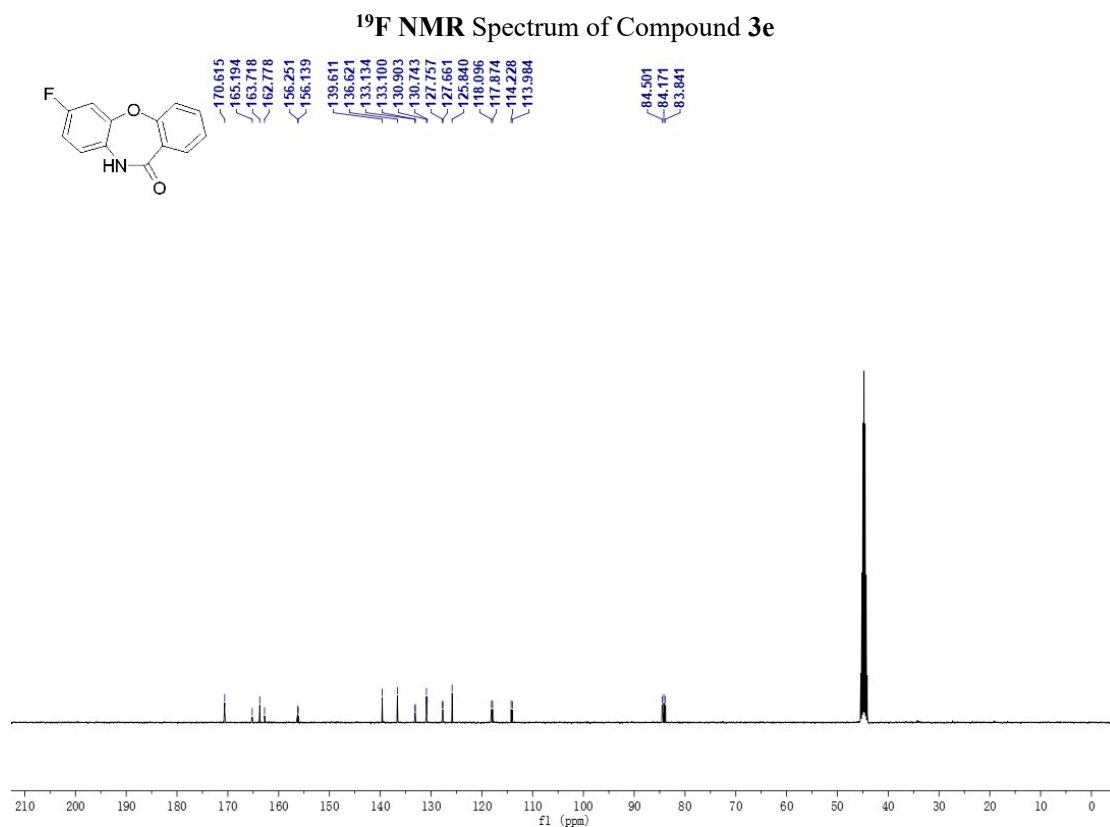

**<sup>13</sup>C NMR Spectrum of Compound 3e**



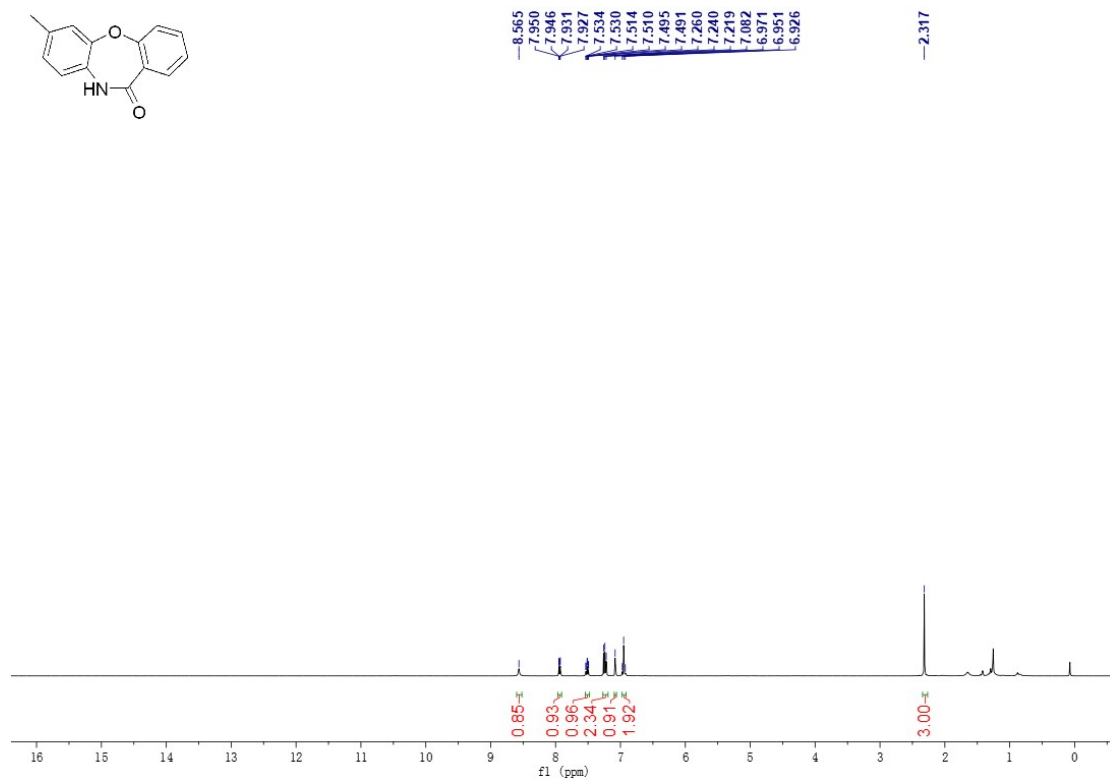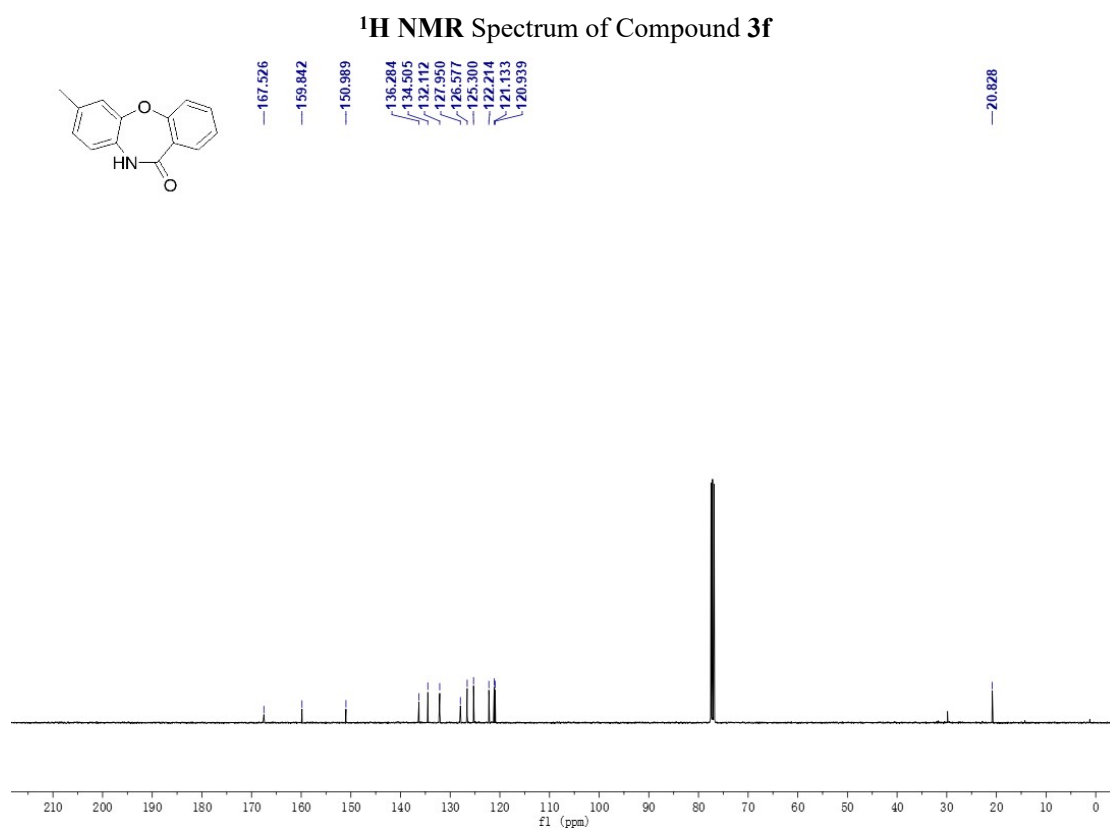

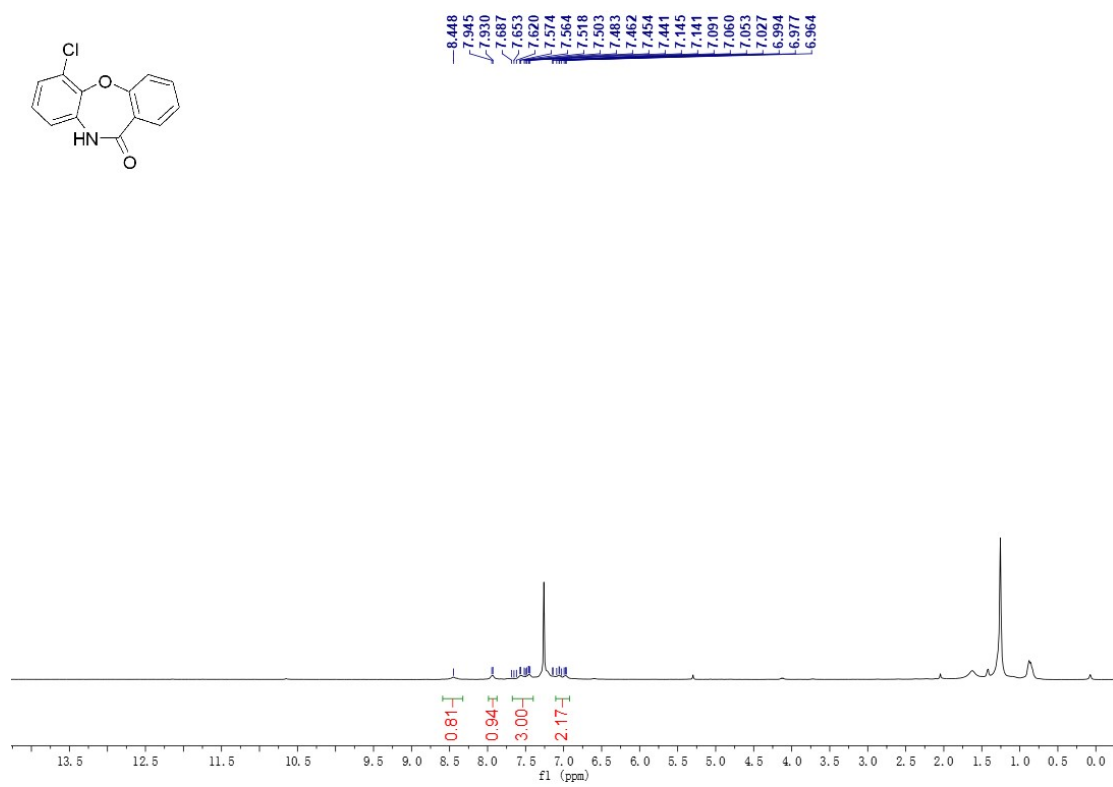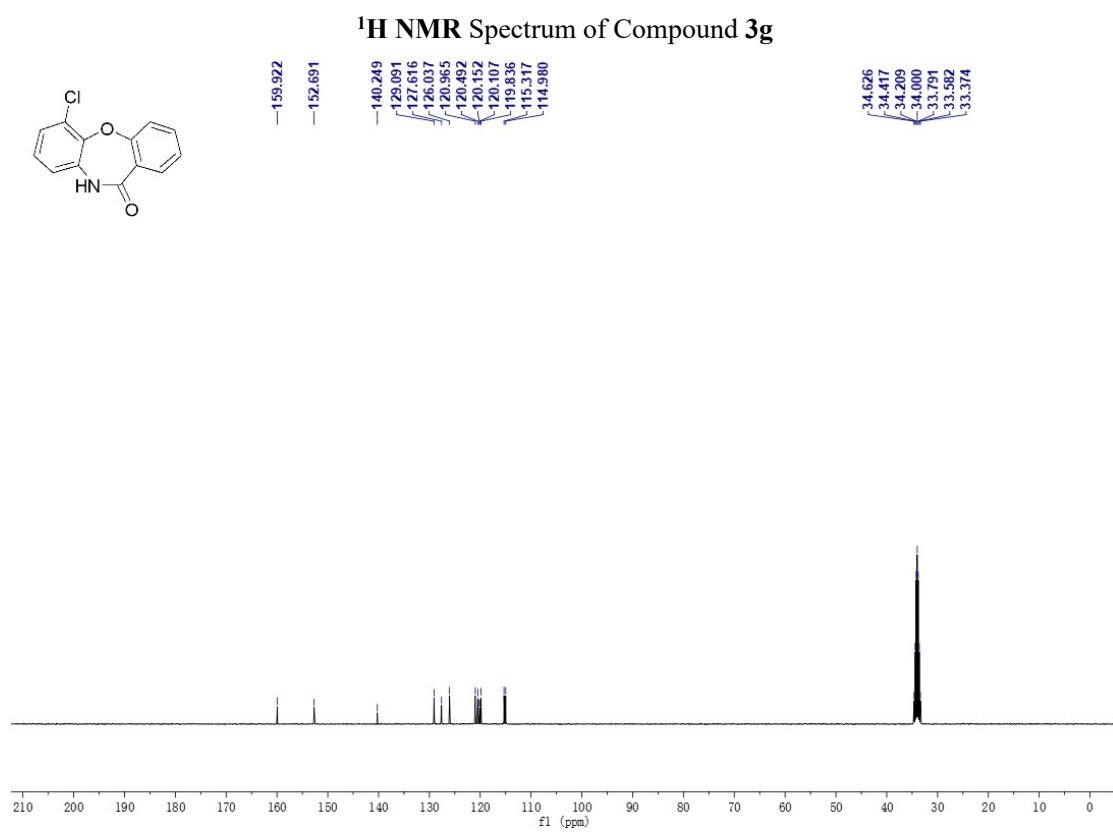

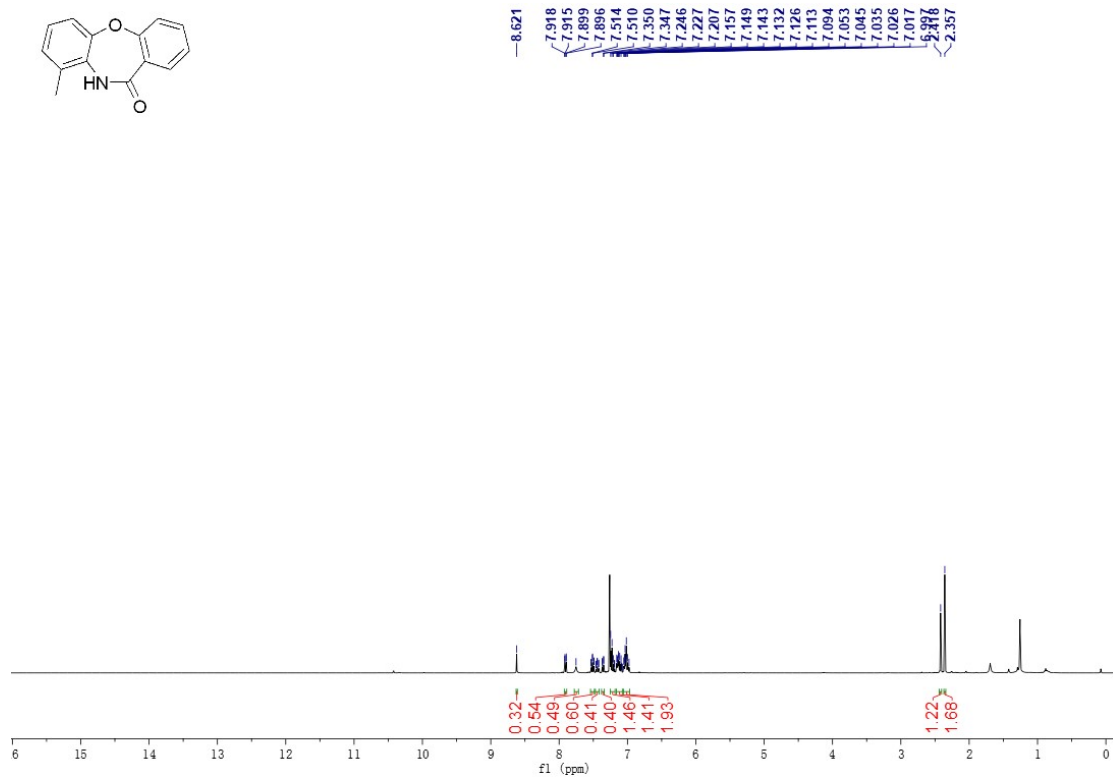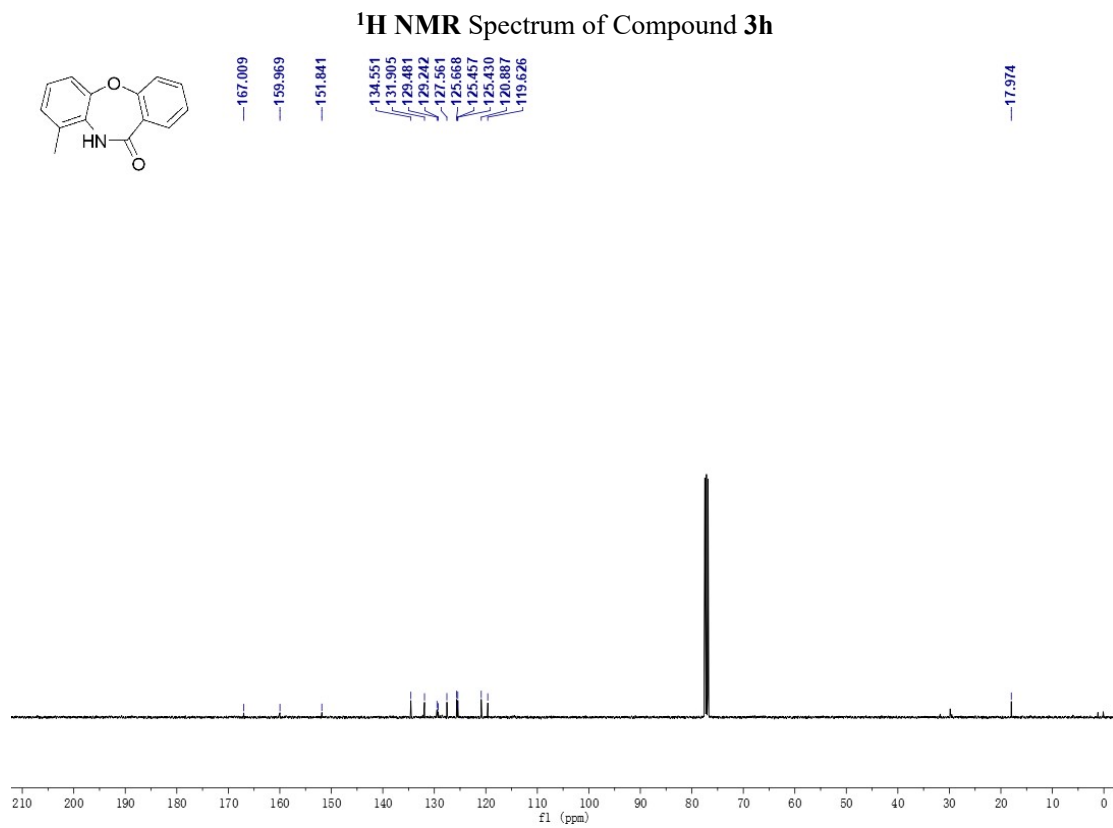

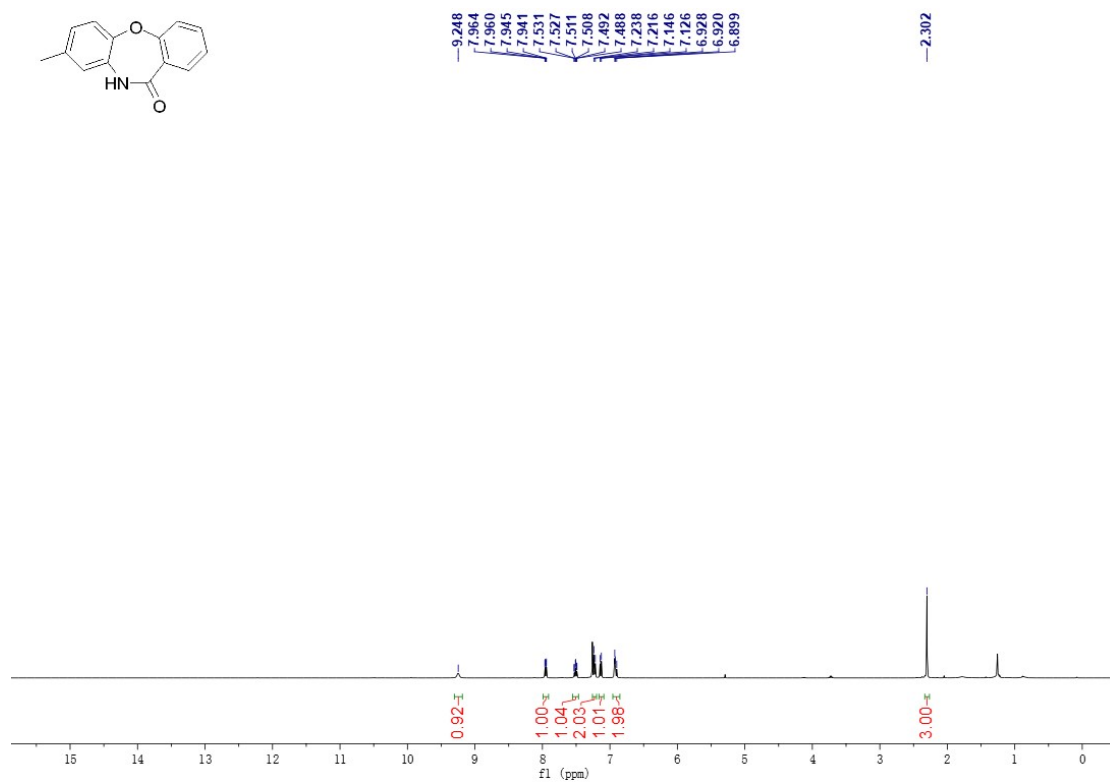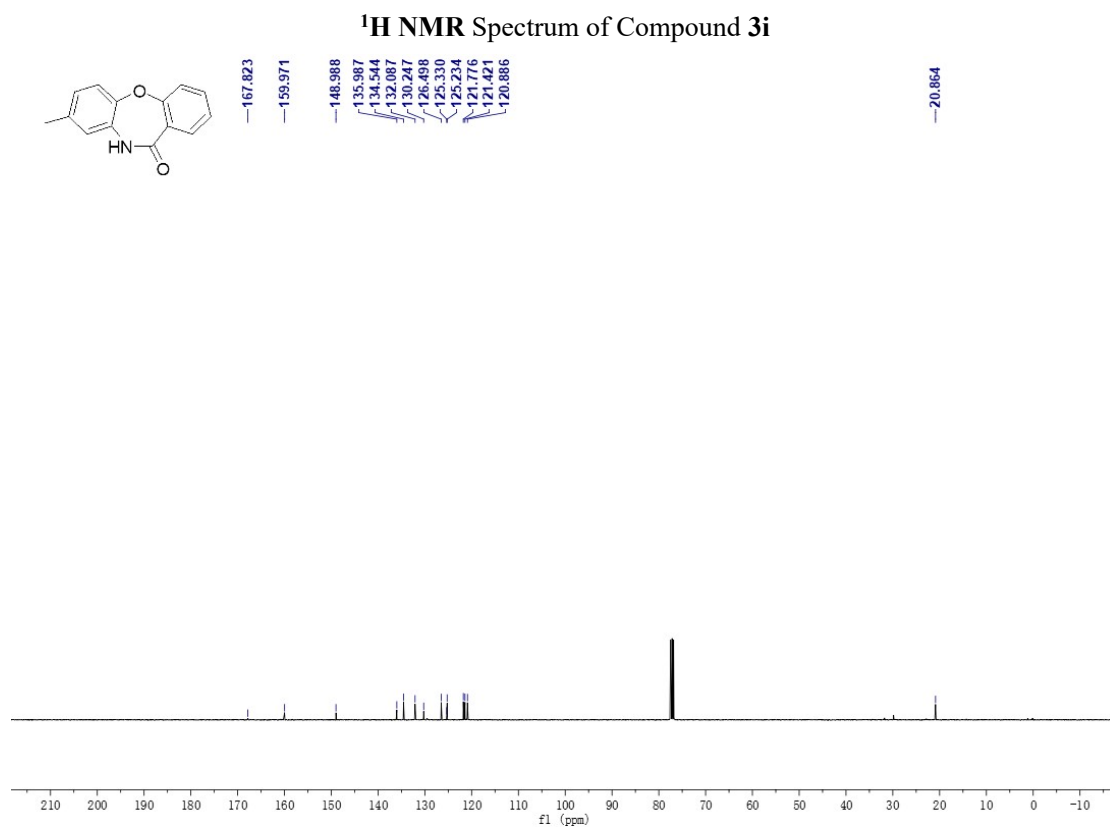

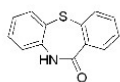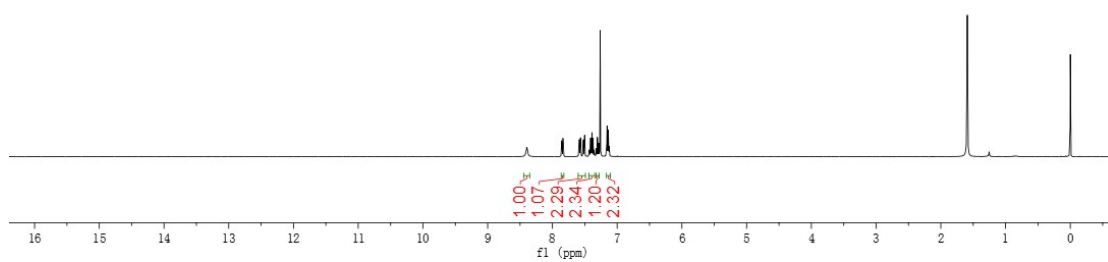

<sup>1</sup>H NMR Spectrum of Compound 3j

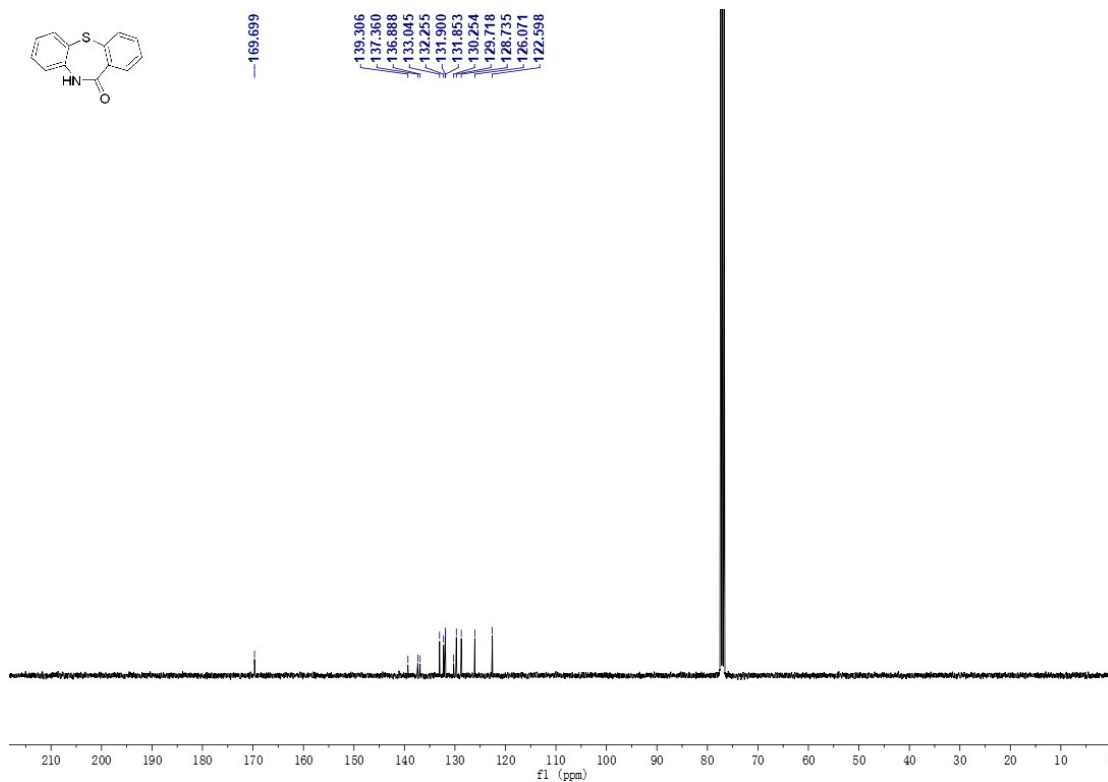

<sup>13</sup>C NMR Spectrum of Compound 3j

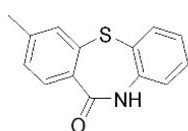

10.605  
7.585  
7.566  
7.548  
7.545  
7.529  
7.526  
7.388  
7.365  
7.349  
7.330  
7.326  
7.289  
7.287  
7.228  
7.225  
7.205  
7.152  
7.149  
7.134  
7.130  
7.115  
7.111

2.297

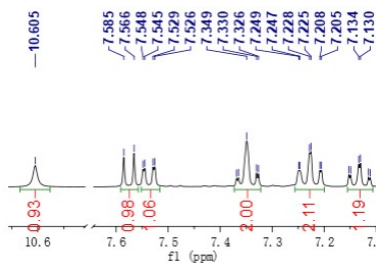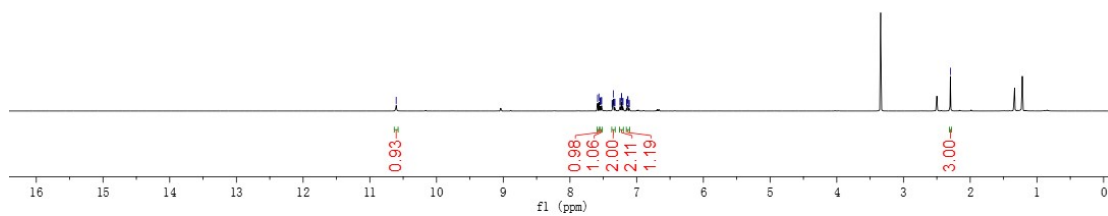

<sup>1</sup>H NMR Spectrum of Compound 3k

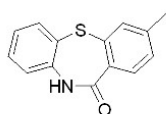

170.471

143.168  
135.773  
137.260  
134.174  
132.978  
132.411  
131.969  
130.118  
129.770  
129.602  
126.006  
122.851

21.297

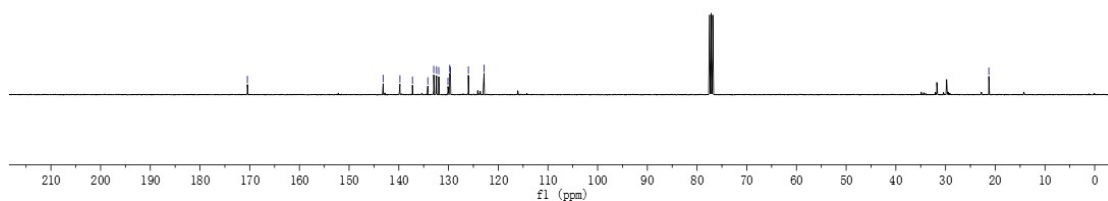

<sup>13</sup>C NMR Spectrum of Compound 3k

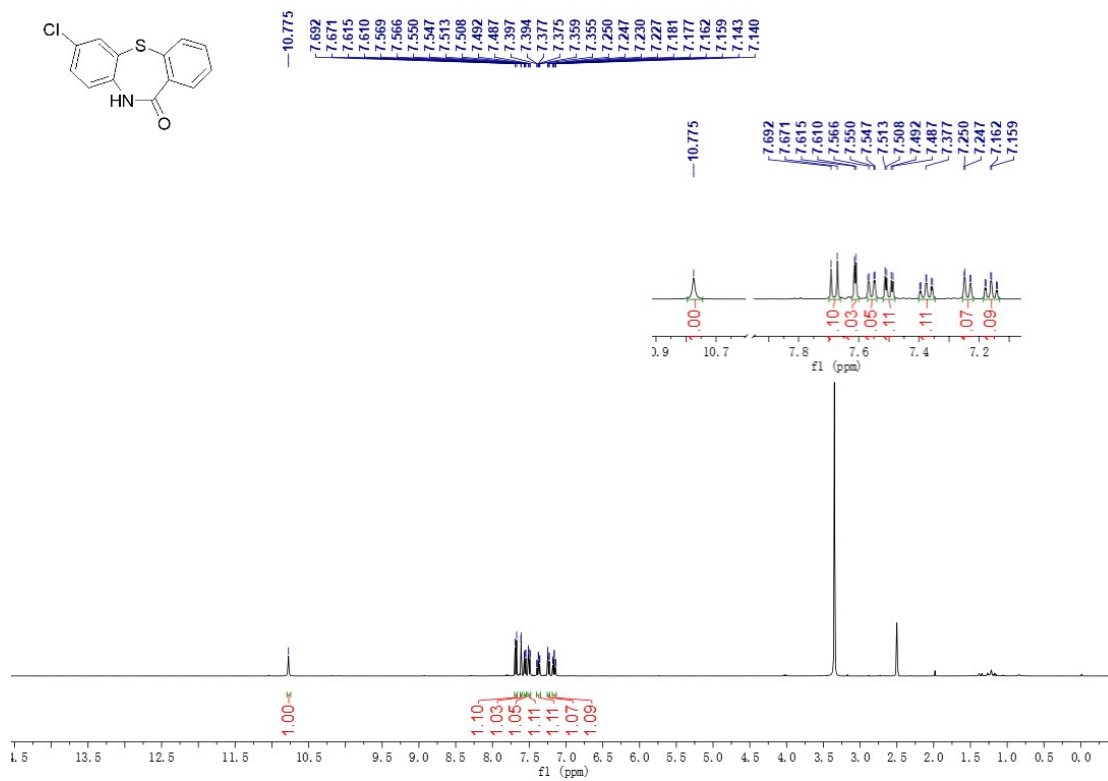

<sup>1</sup>H NMR Spectrum of Compound 31

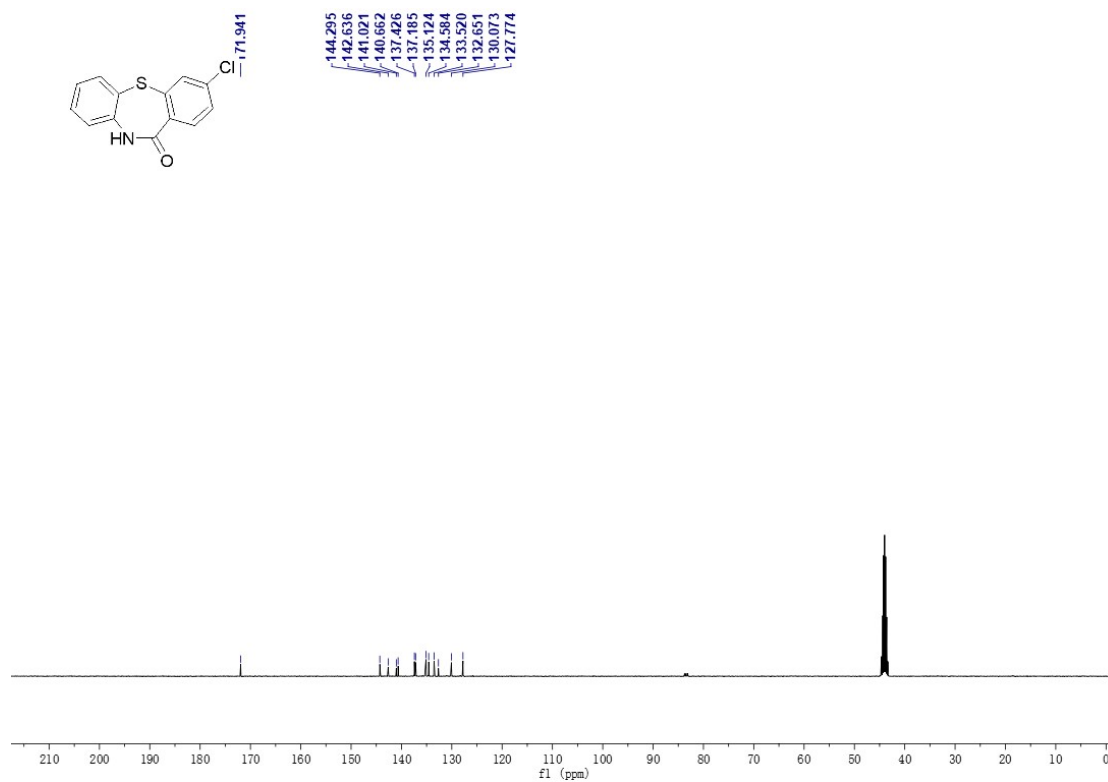

<sup>13</sup>C NMR Spectrum of Compound 31

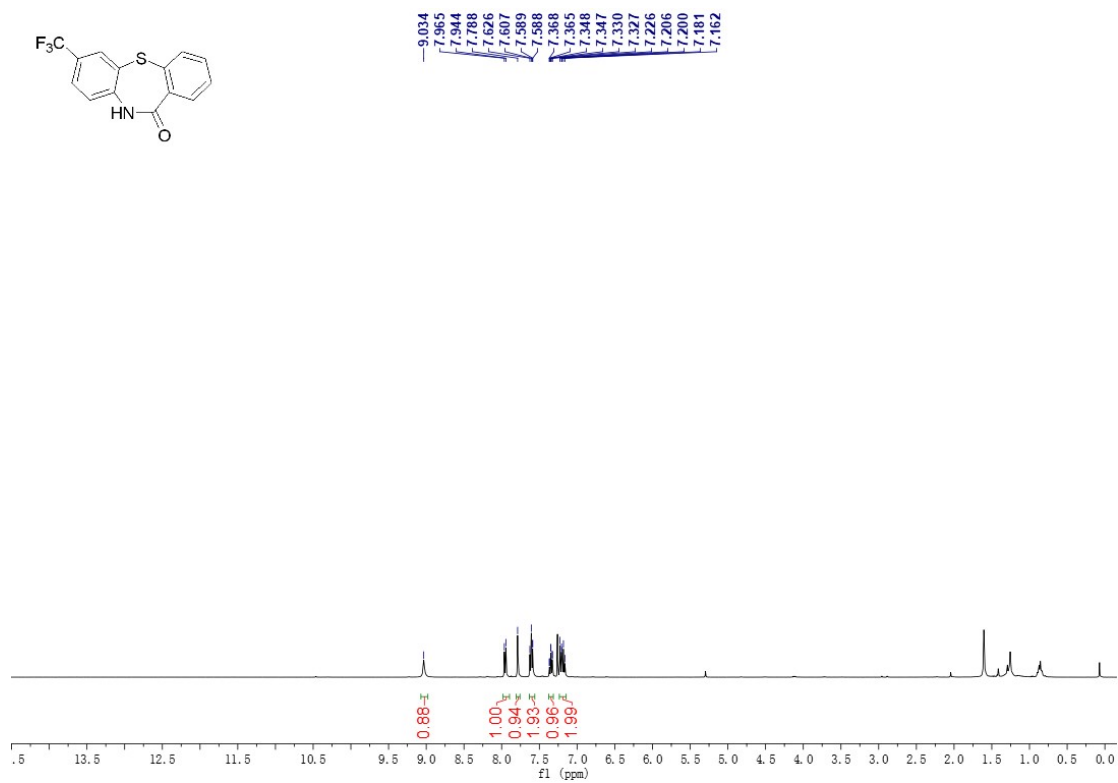

**<sup>1</sup>H NMR Spectrum of Compound 3m**

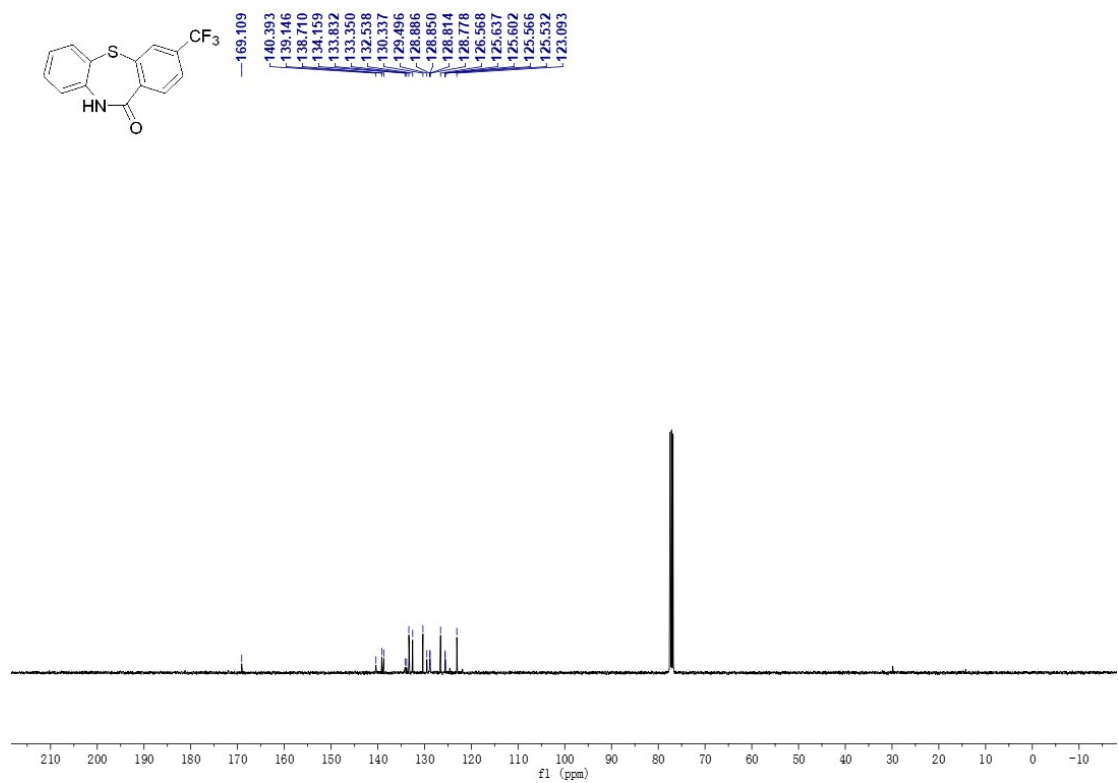

**<sup>13</sup>C NMR Spectrum of Compound 3m**



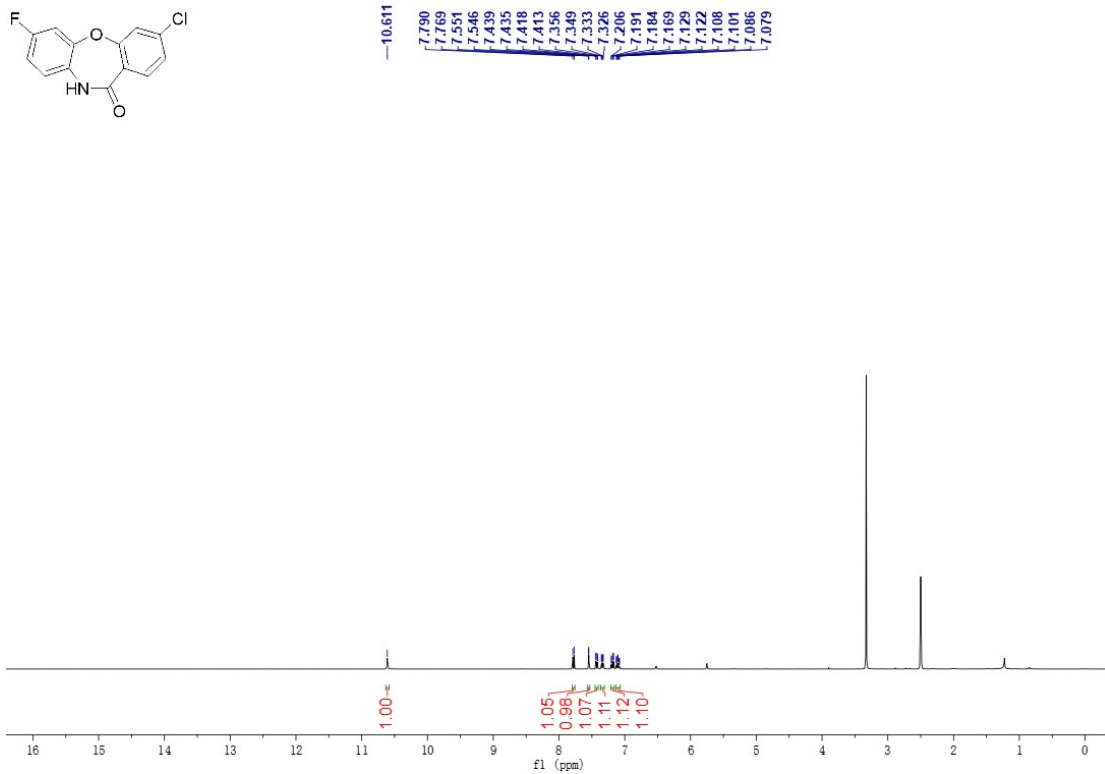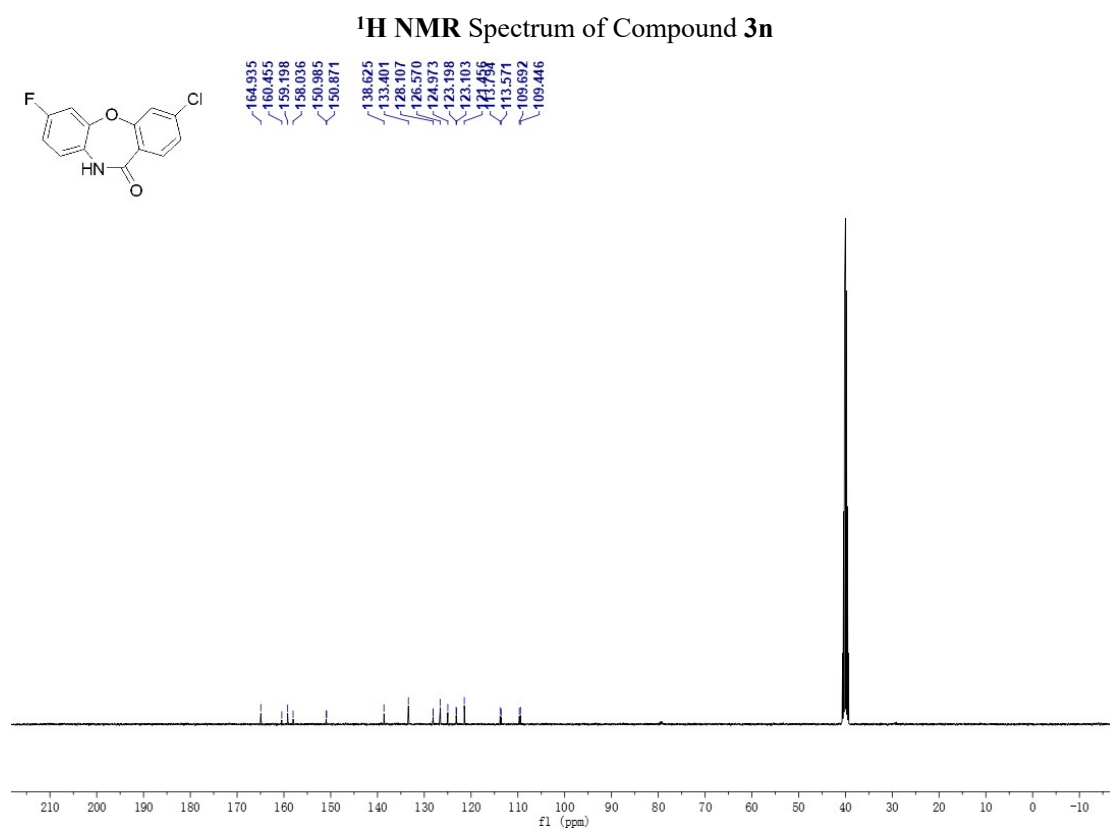

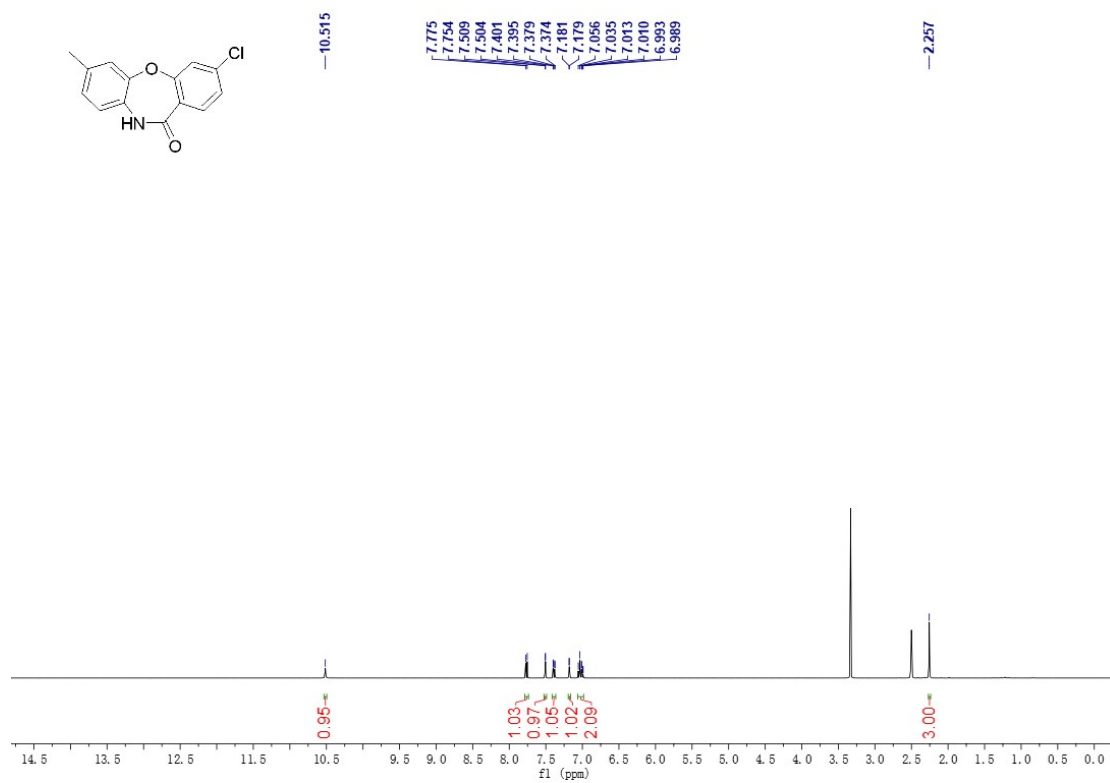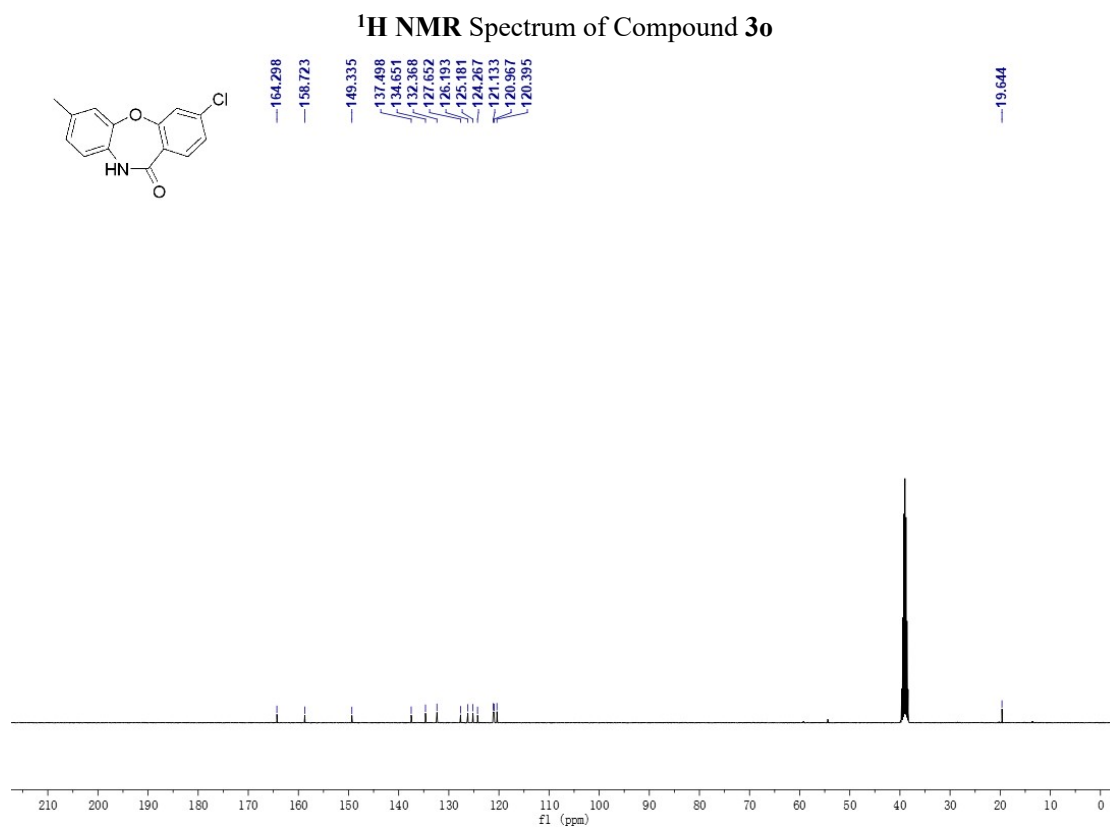

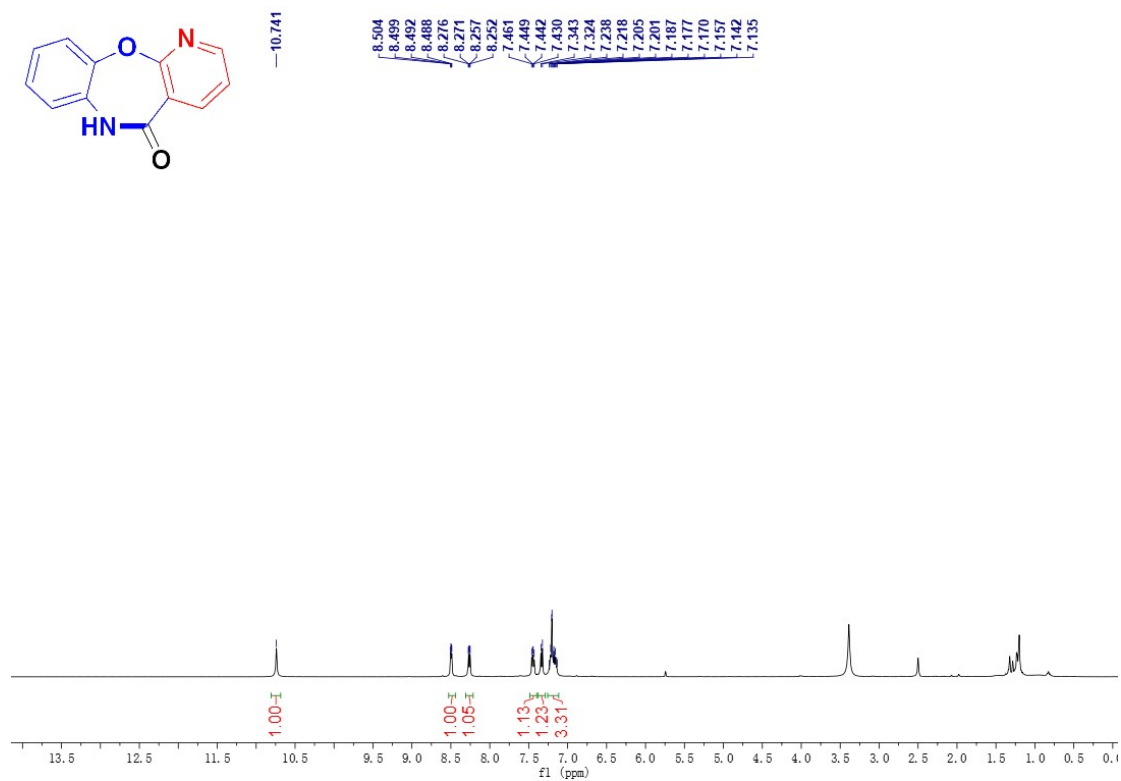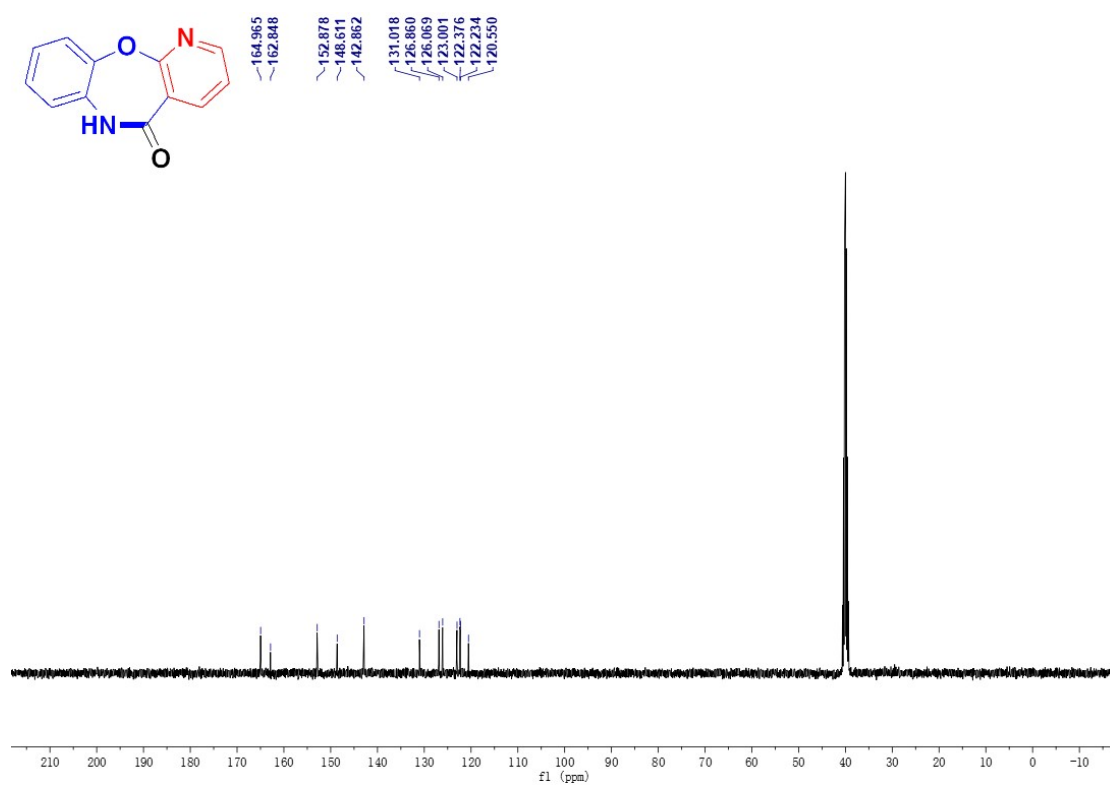

Copies of  $^1\text{H}$  (400 MHz),  $^{31}\text{P}$  (377 MHz) and  $^{13}\text{C}$  (101 MHz) spectra of products  
5aA-5aG in  $\text{CDCl}_3$  or  $\text{DMSO-d}_6$

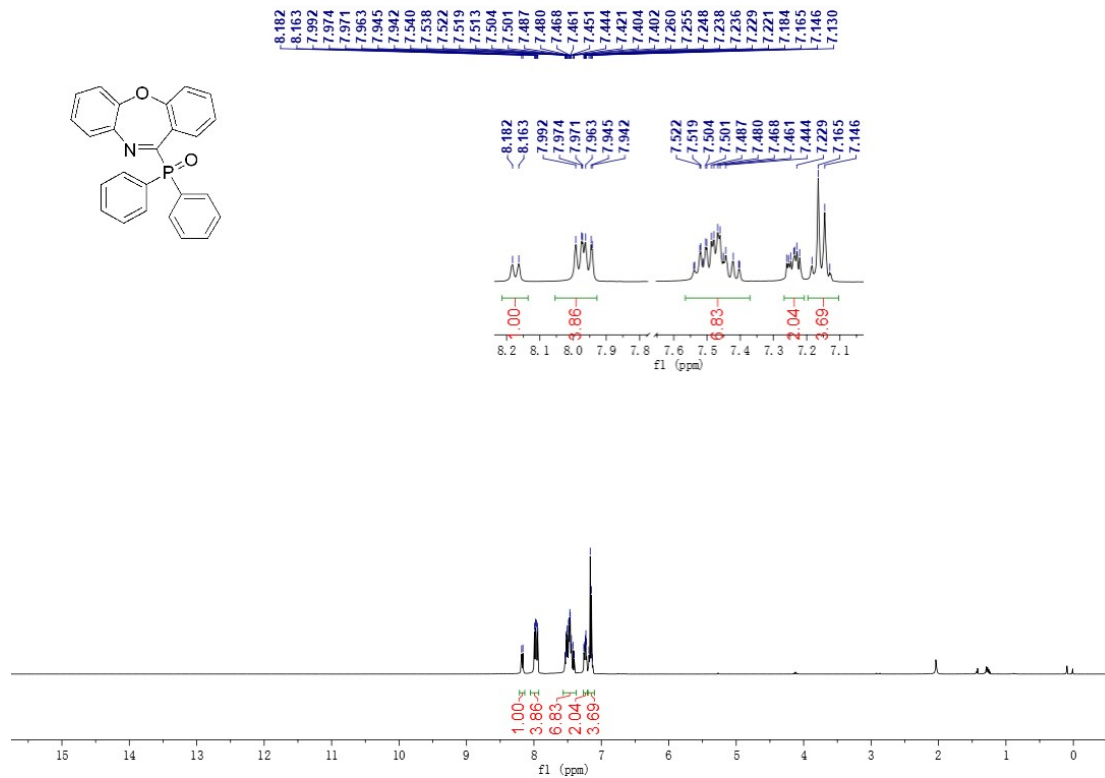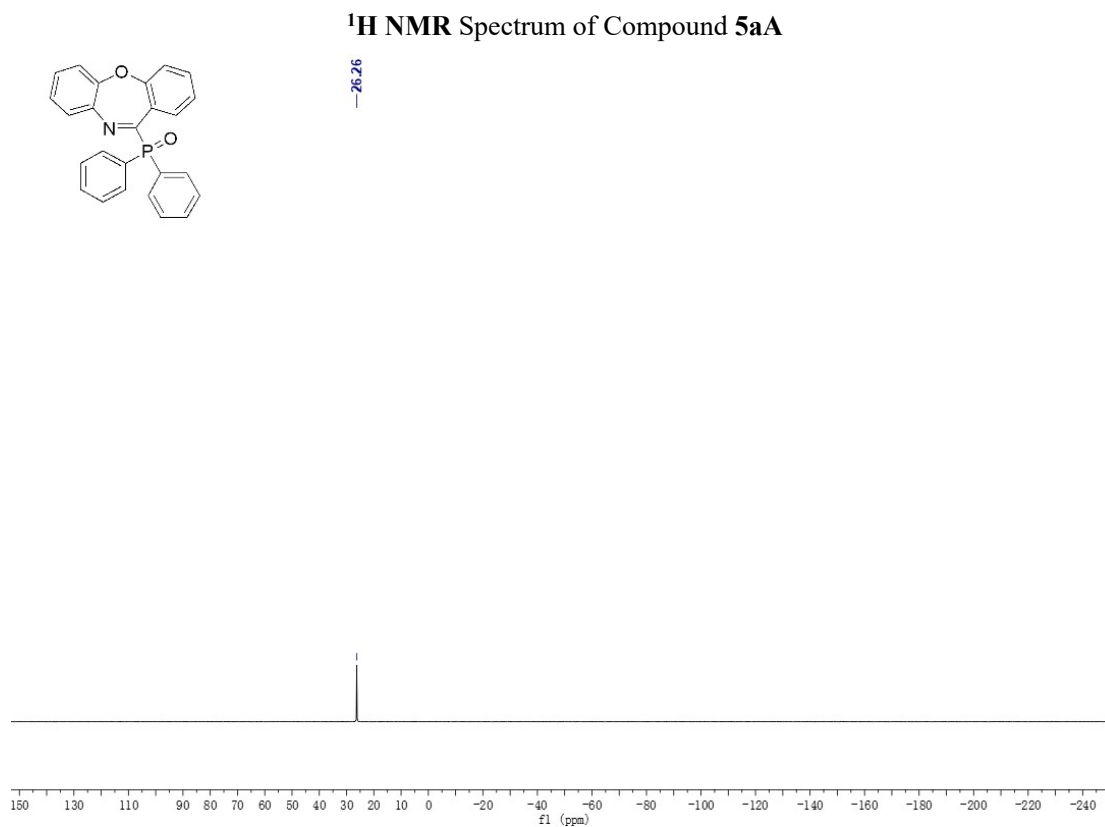

$^{31}\text{P}$  NMR Spectrum of Compound 5aA

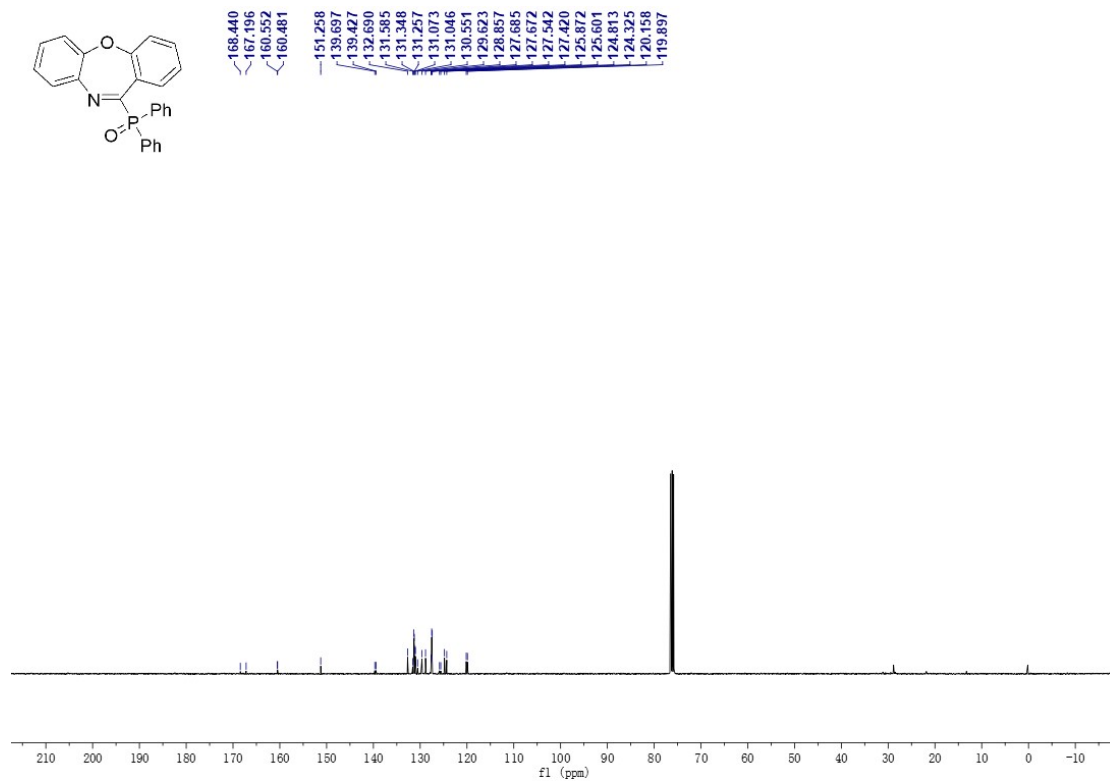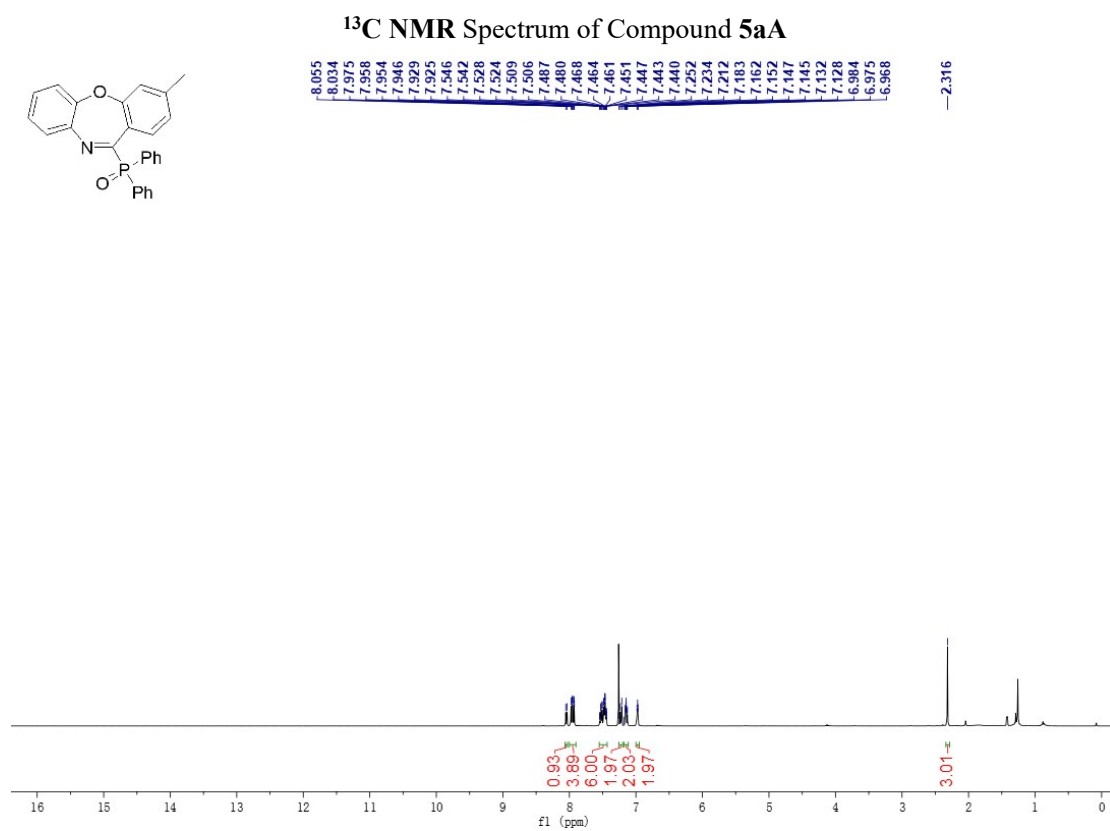

**<sup>1</sup>H NMR Spectrum of Compound 5bA**

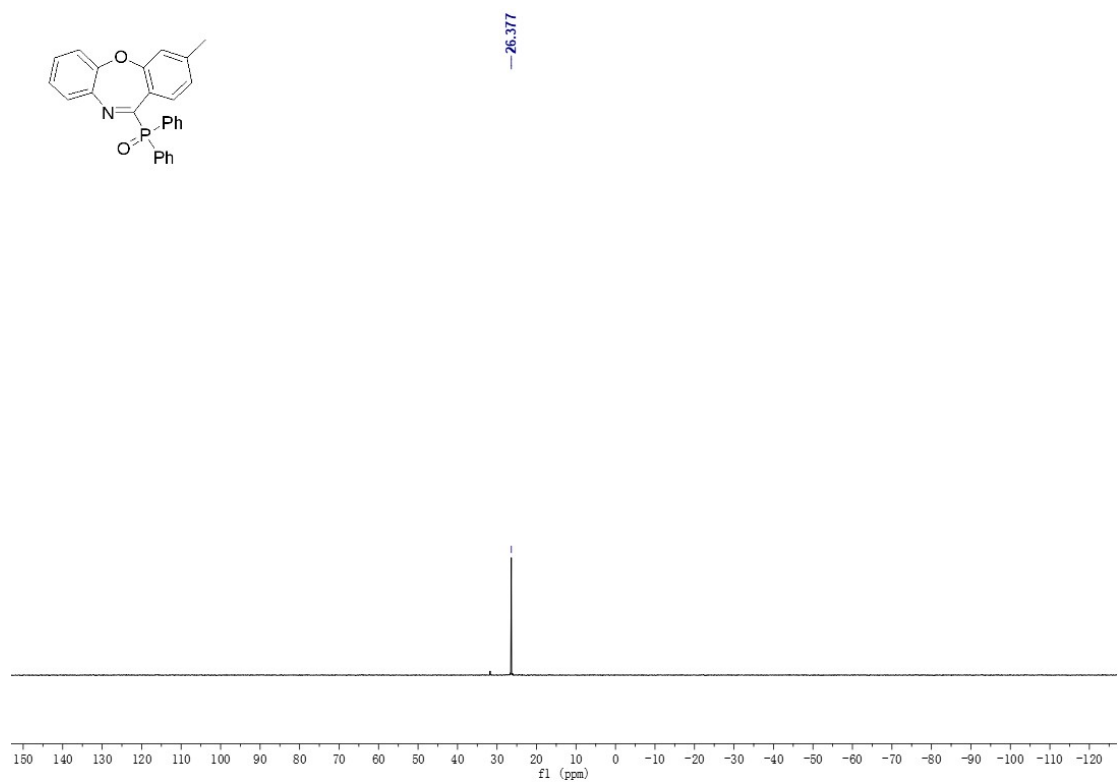

<sup>31</sup>P NMR Spectrum of Compound 5bA

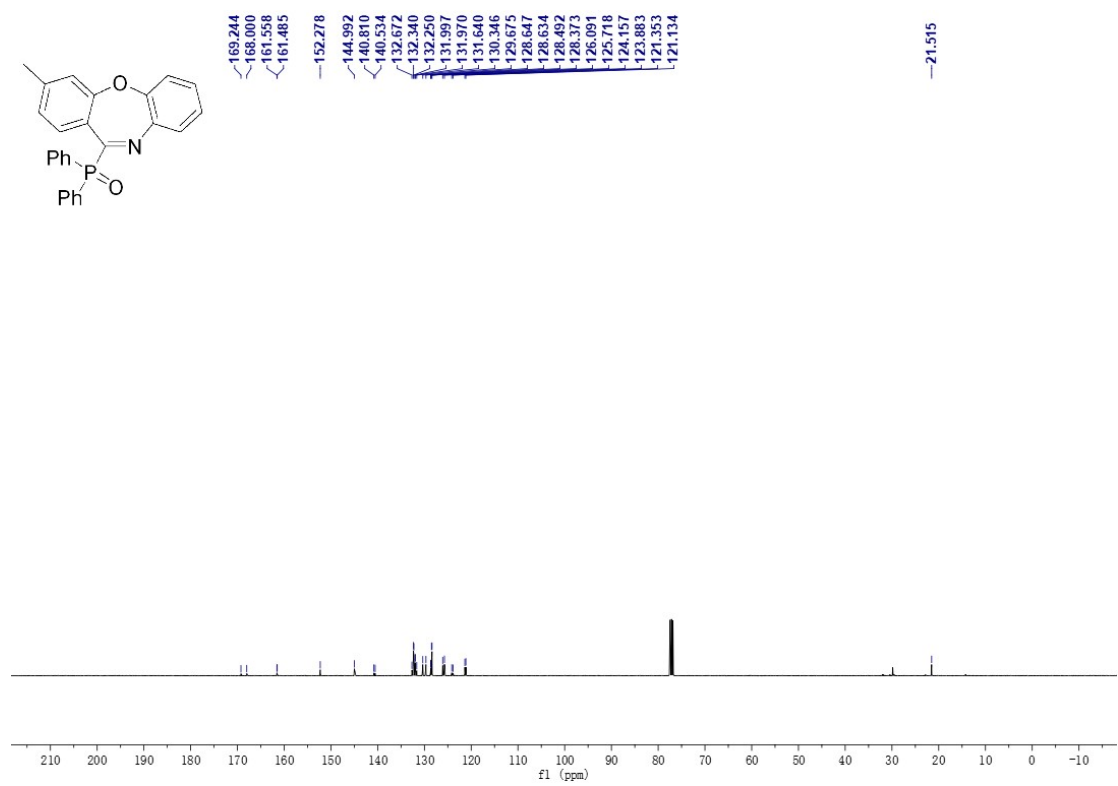

<sup>13</sup>C NMR Spectrum of Compound 5bA

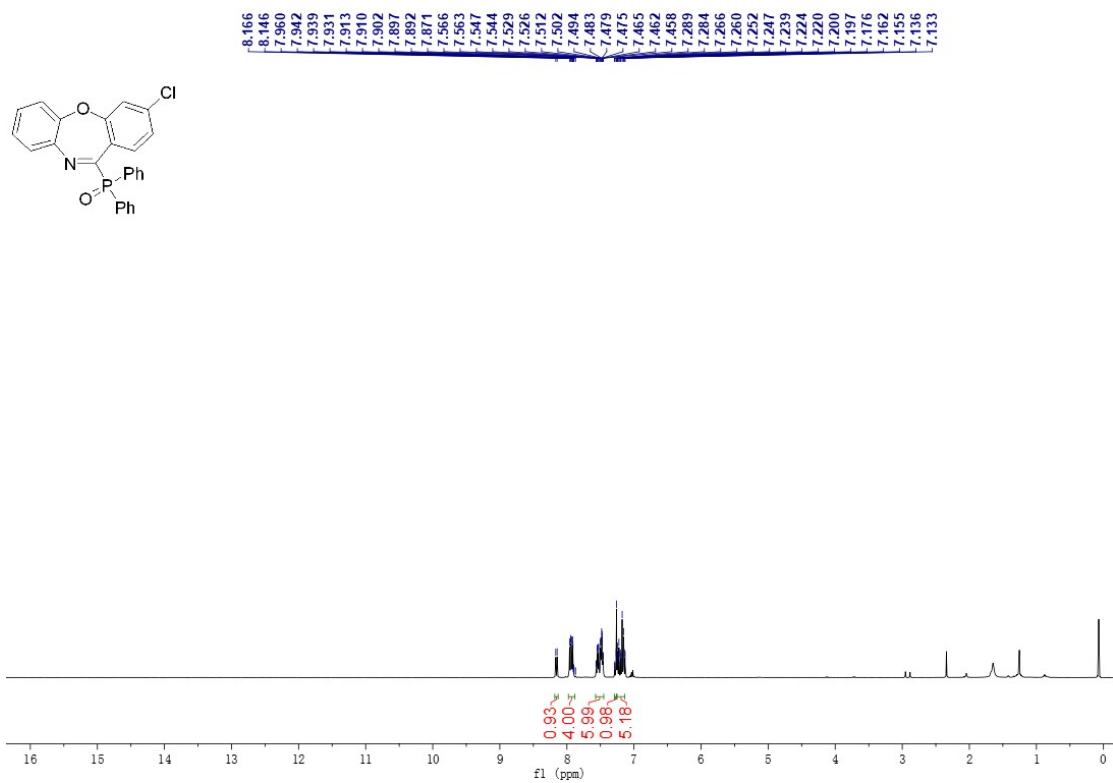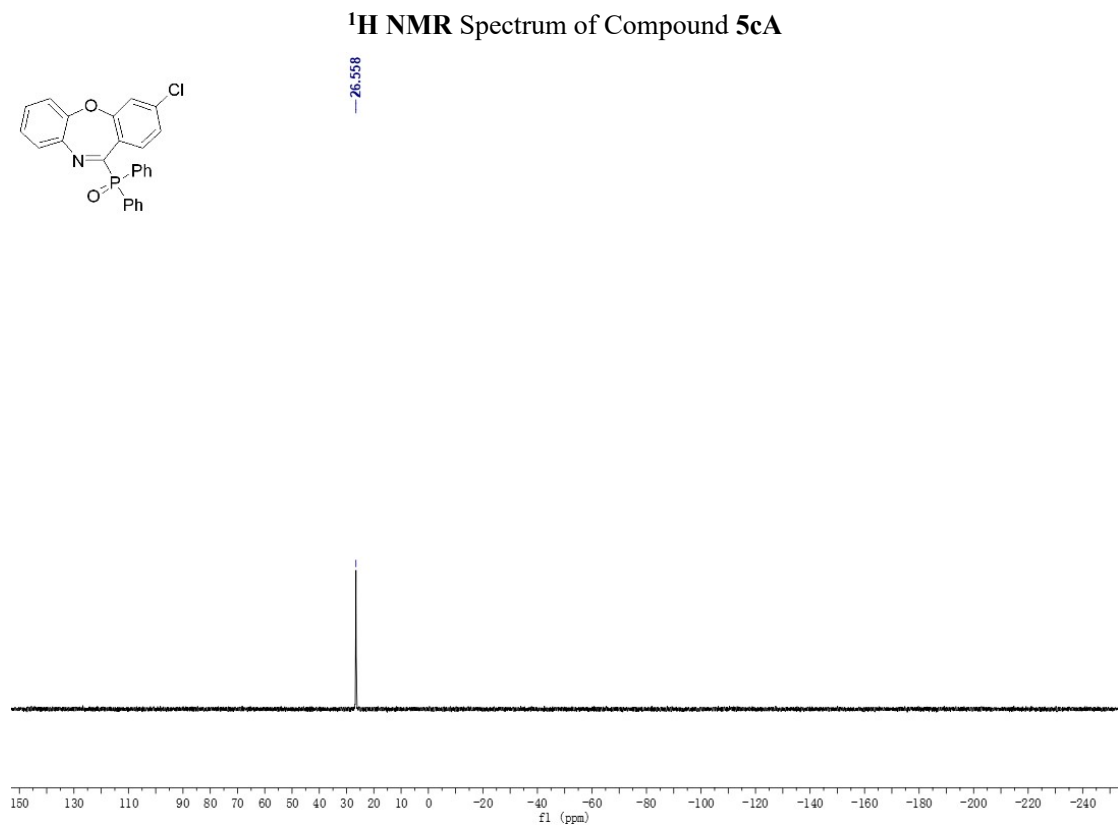

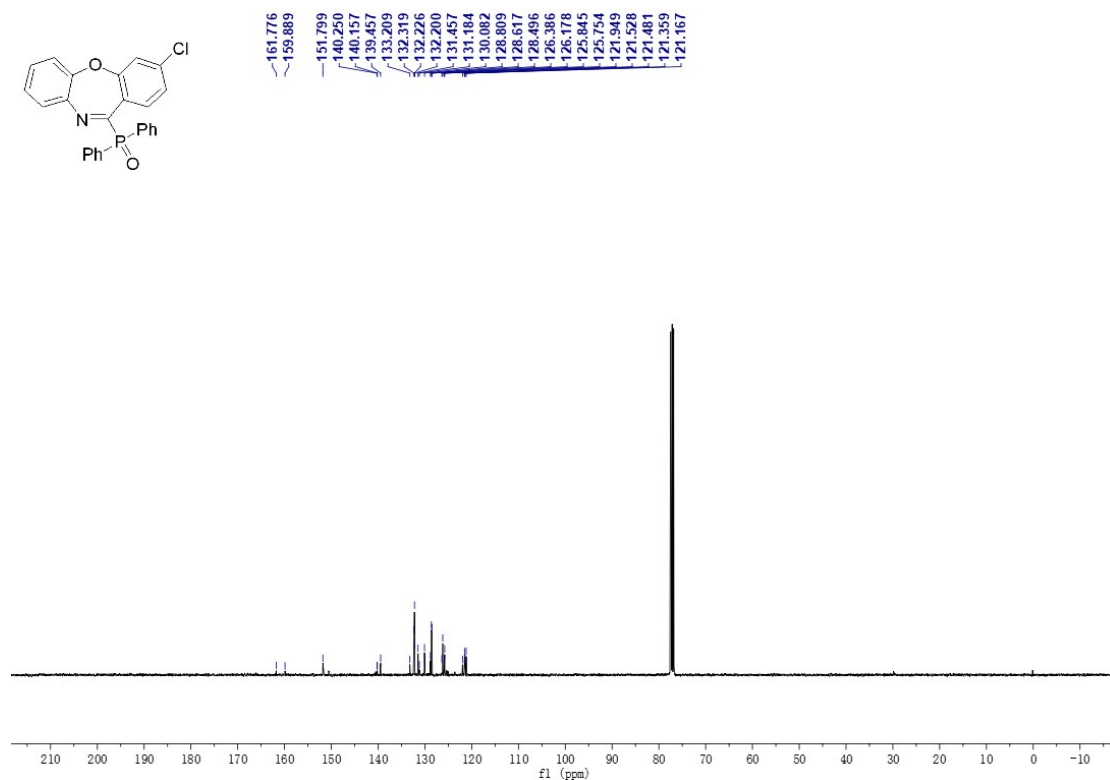

<sup>13</sup>C NMR Spectrum of Compound 5cA

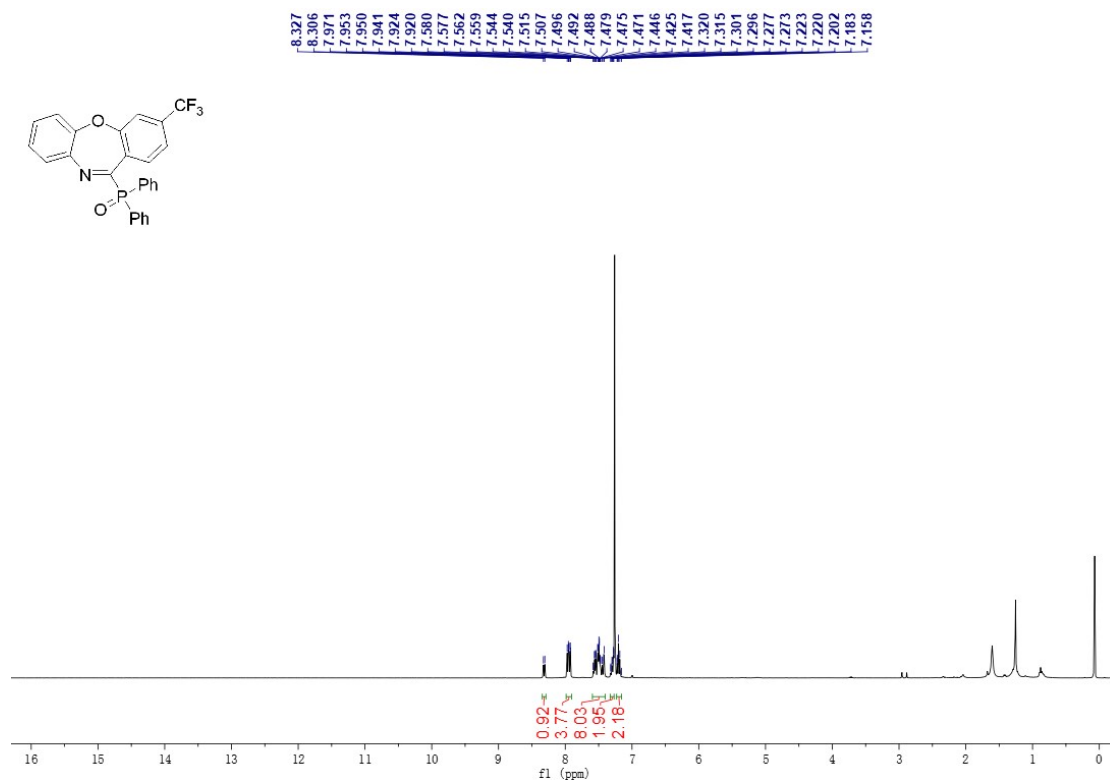

<sup>1</sup>H NMR Spectrum of Compound 5dA



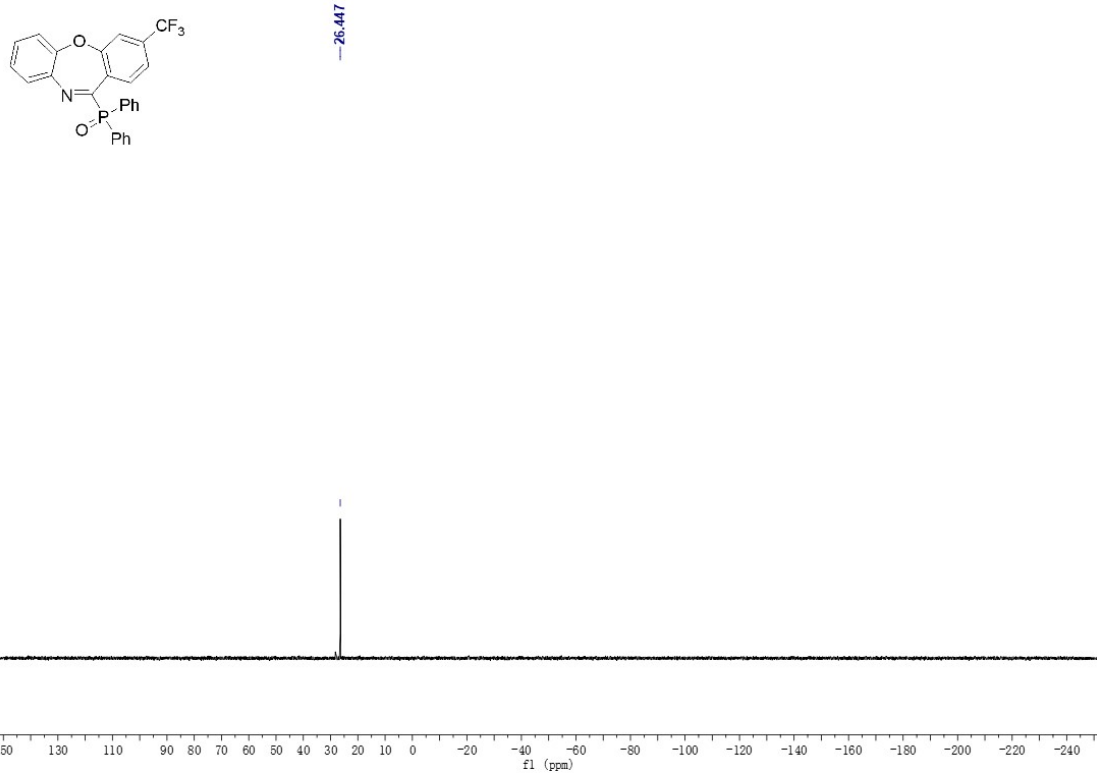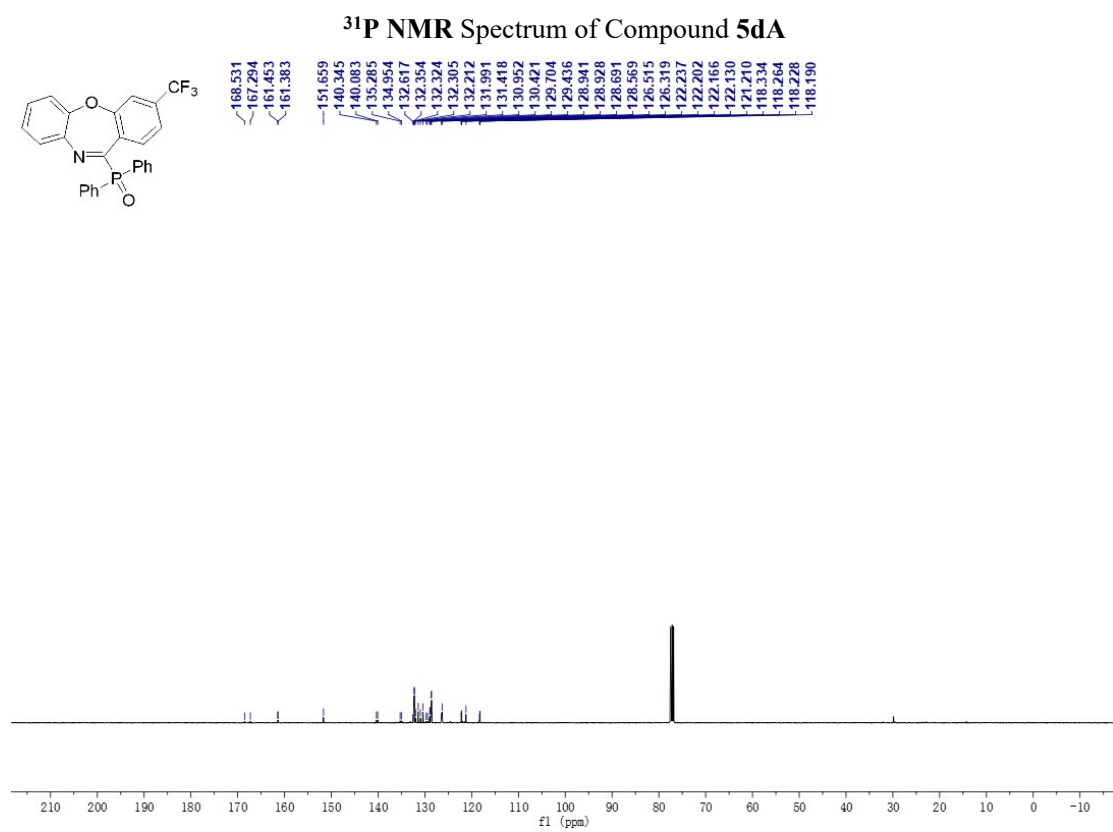

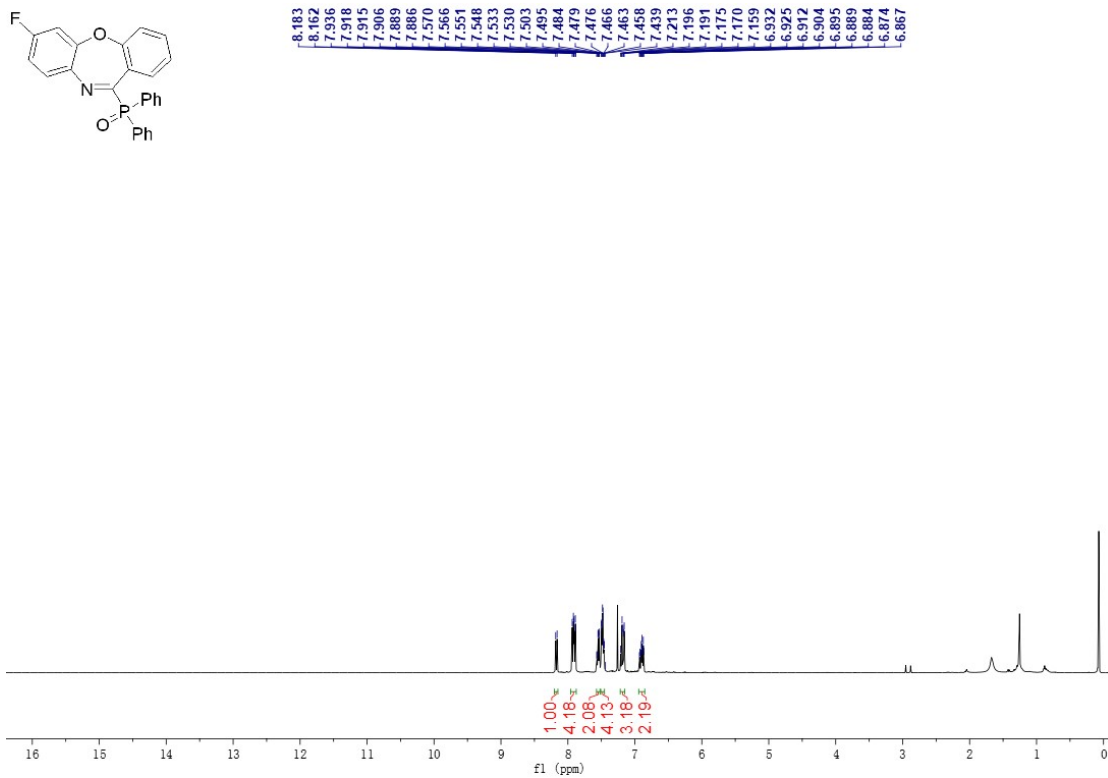

<sup>1</sup>H NMR Spectrum of Compound 5eA

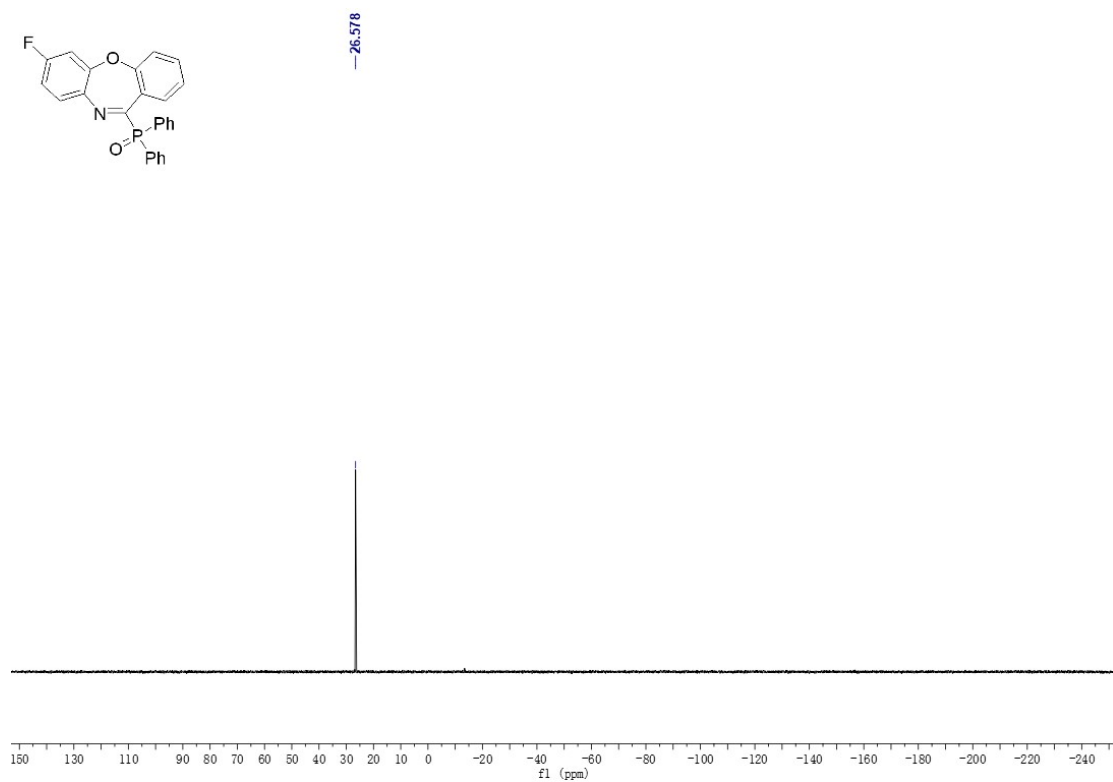

<sup>31</sup>P NMR Spectrum of Compound 5eA

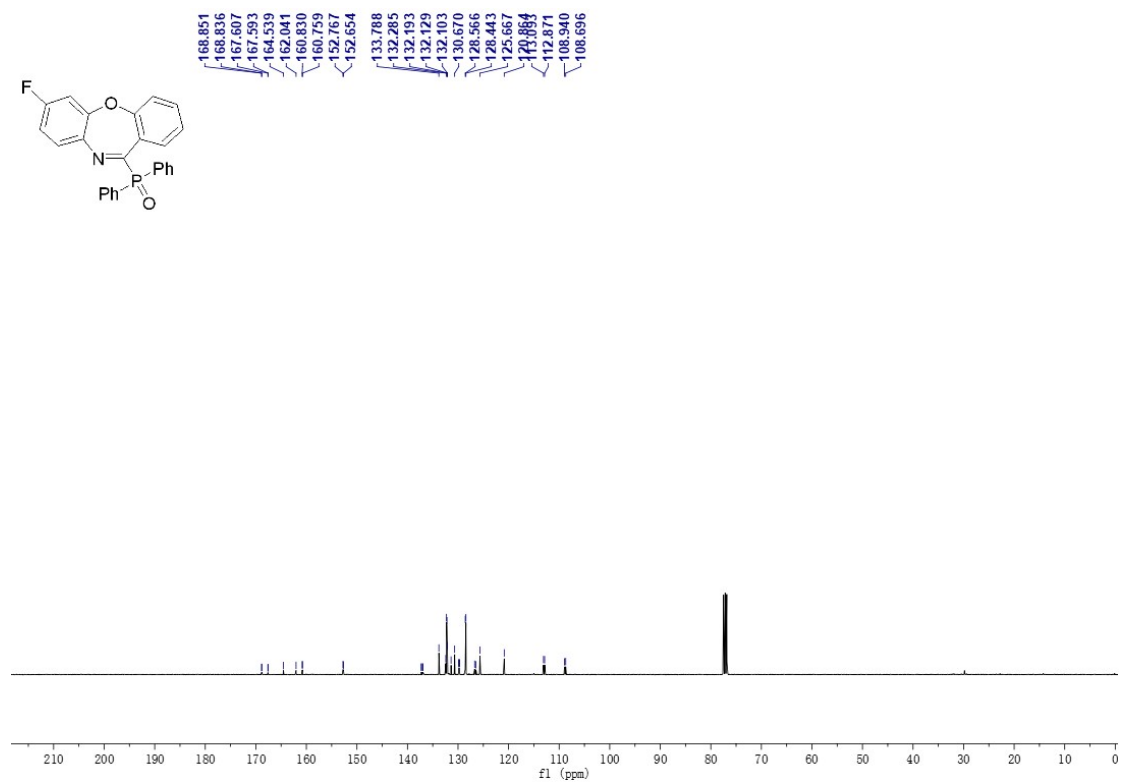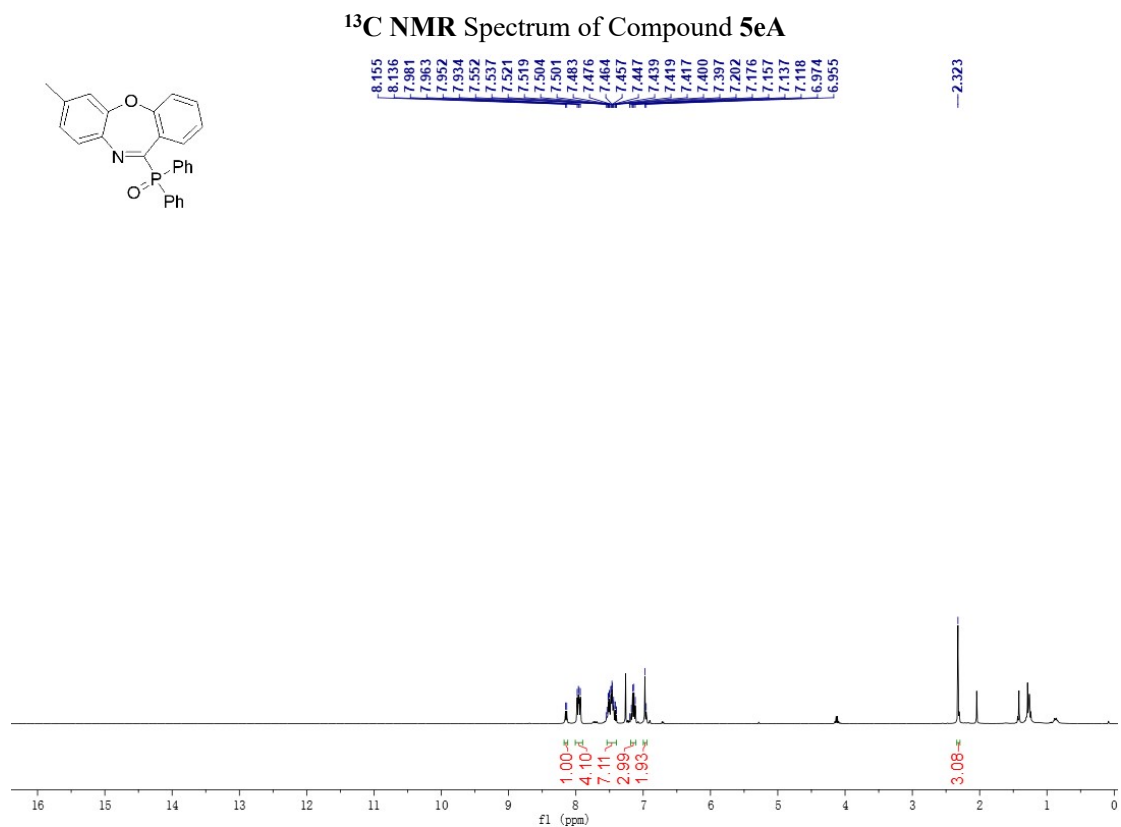

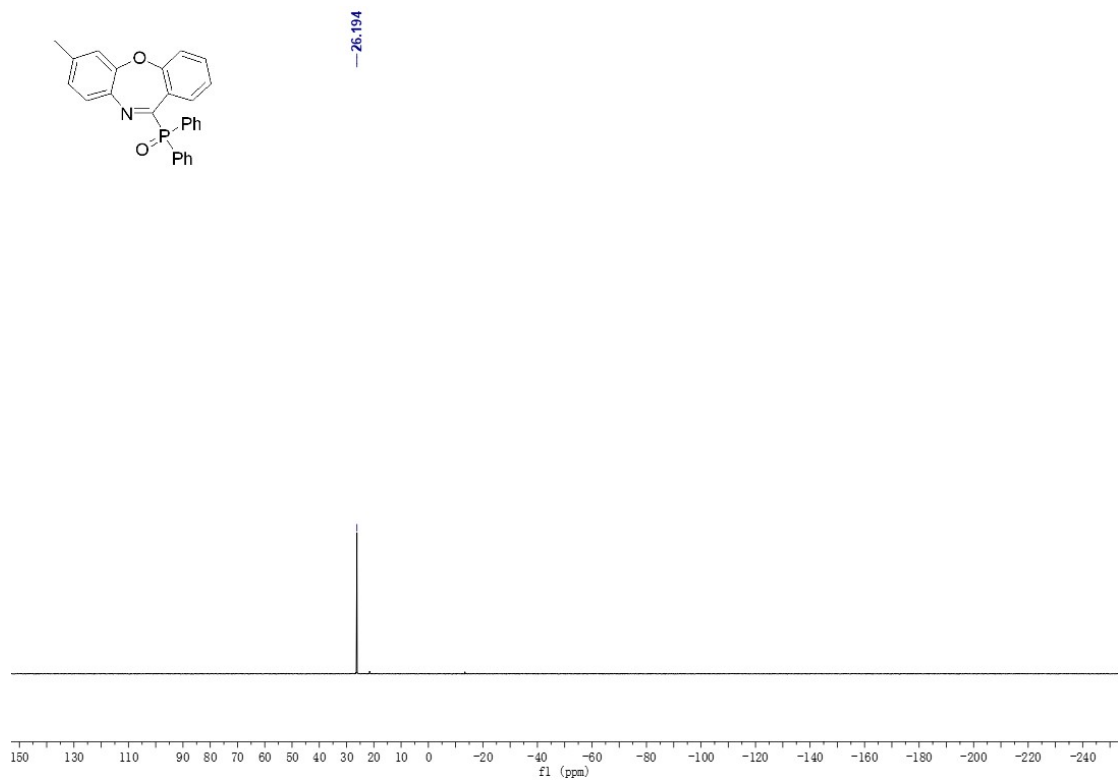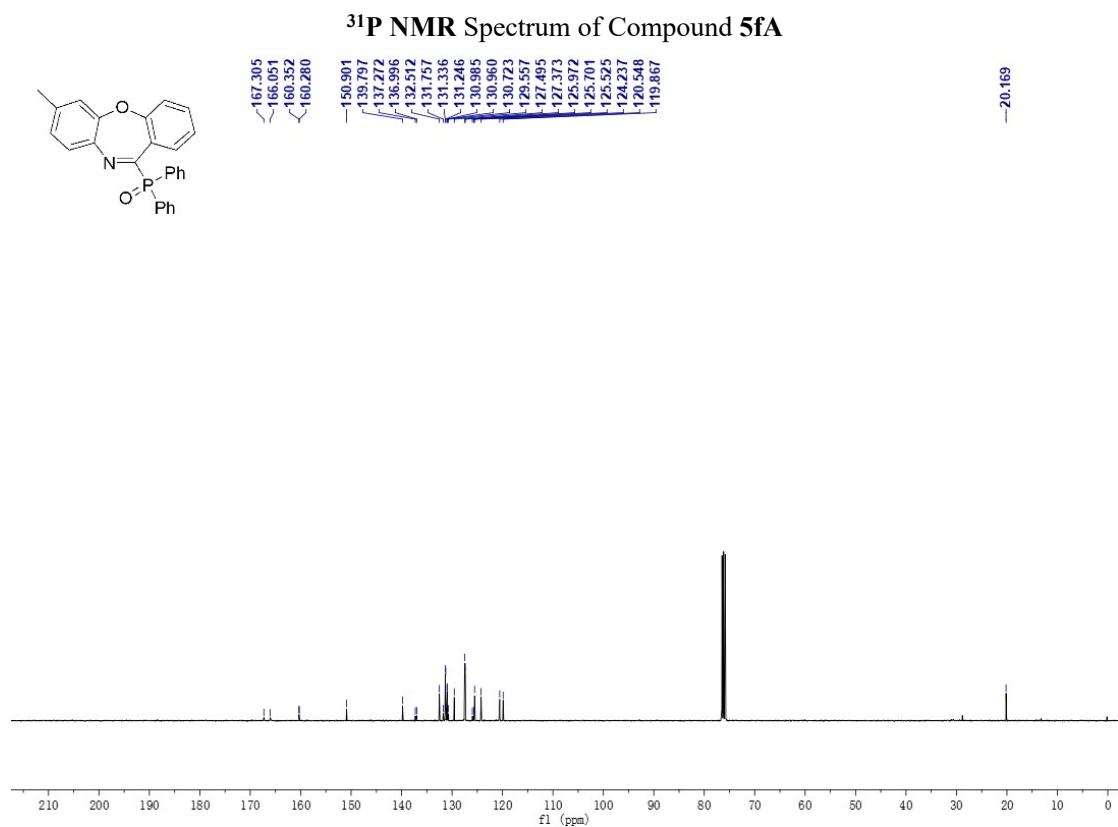

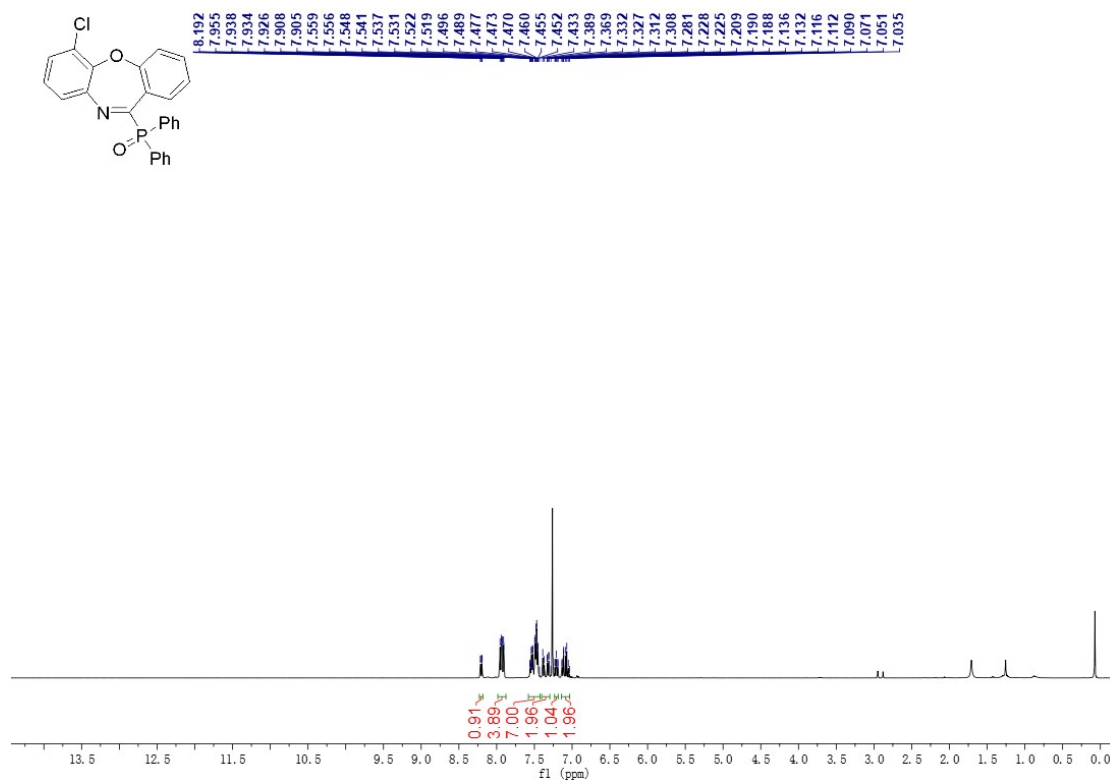

<sup>1</sup>H NMR Spectrum of Compound 5gA

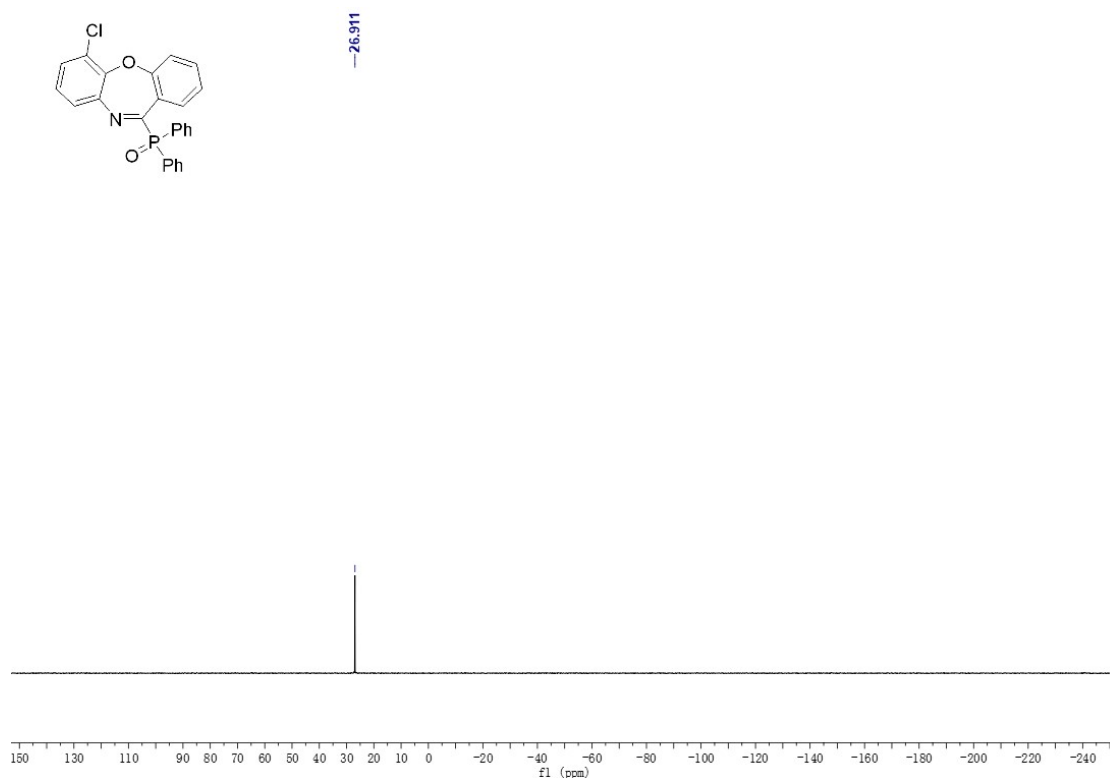

<sup>31</sup>P NMR Spectrum of Compound 5gA

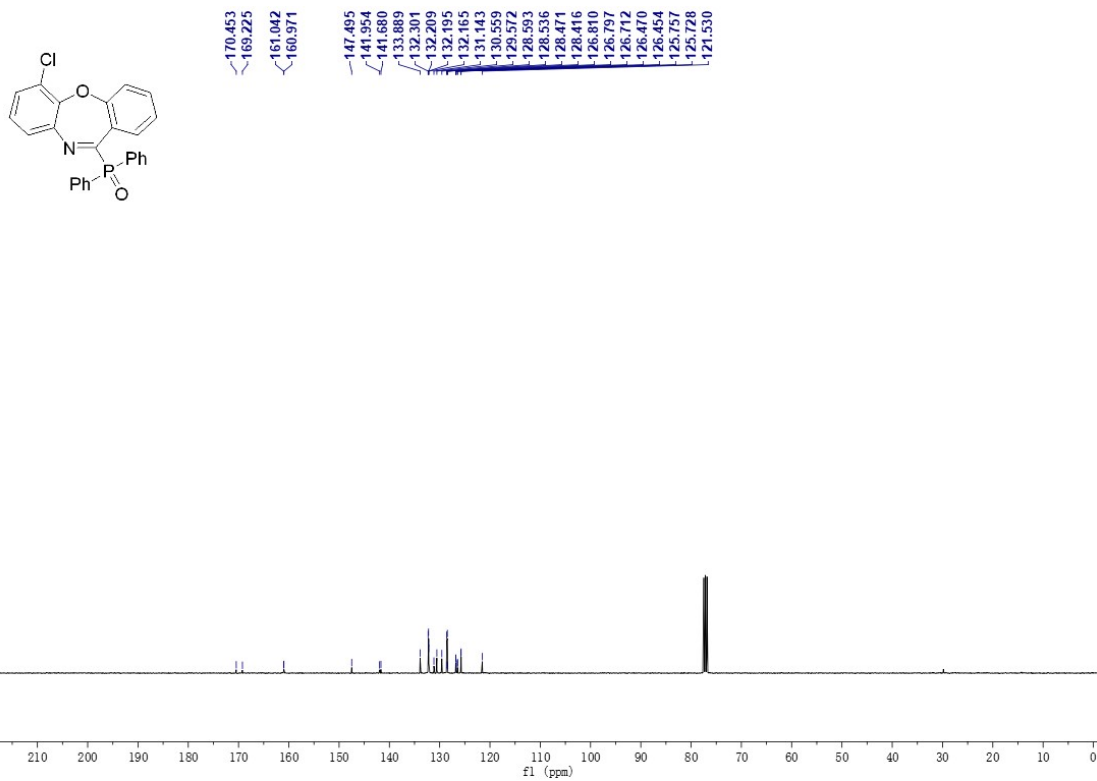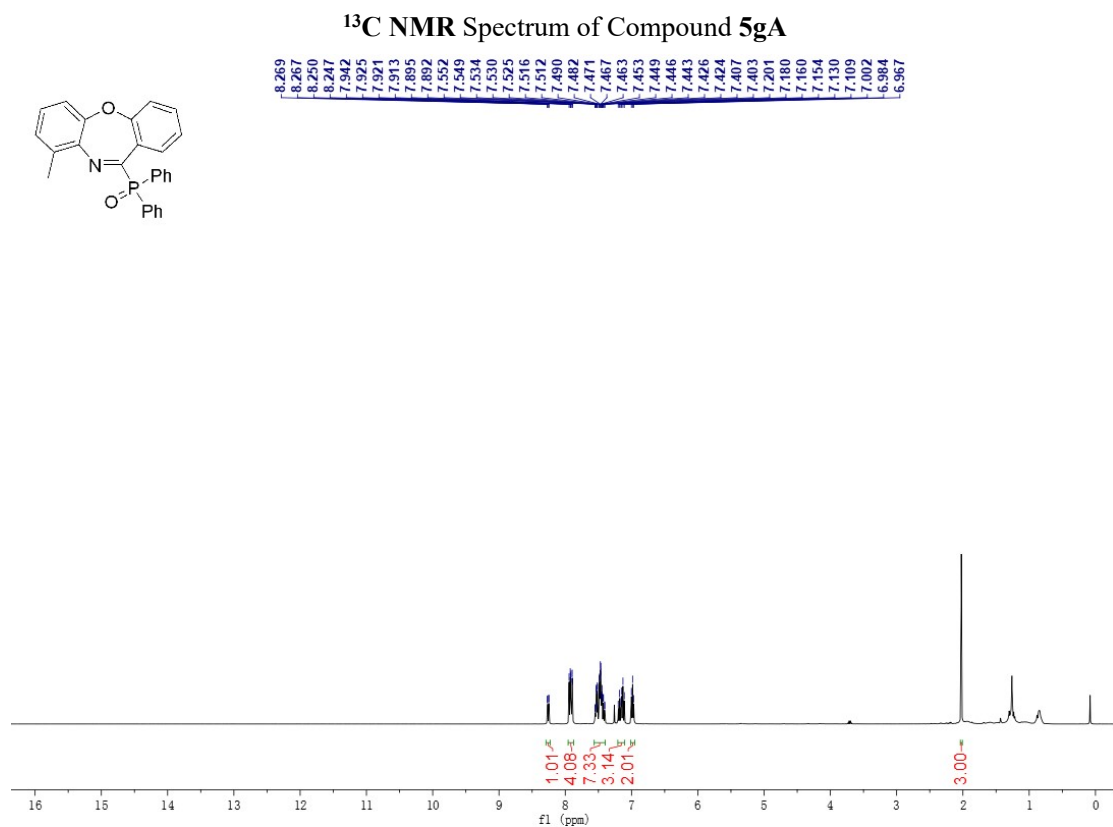

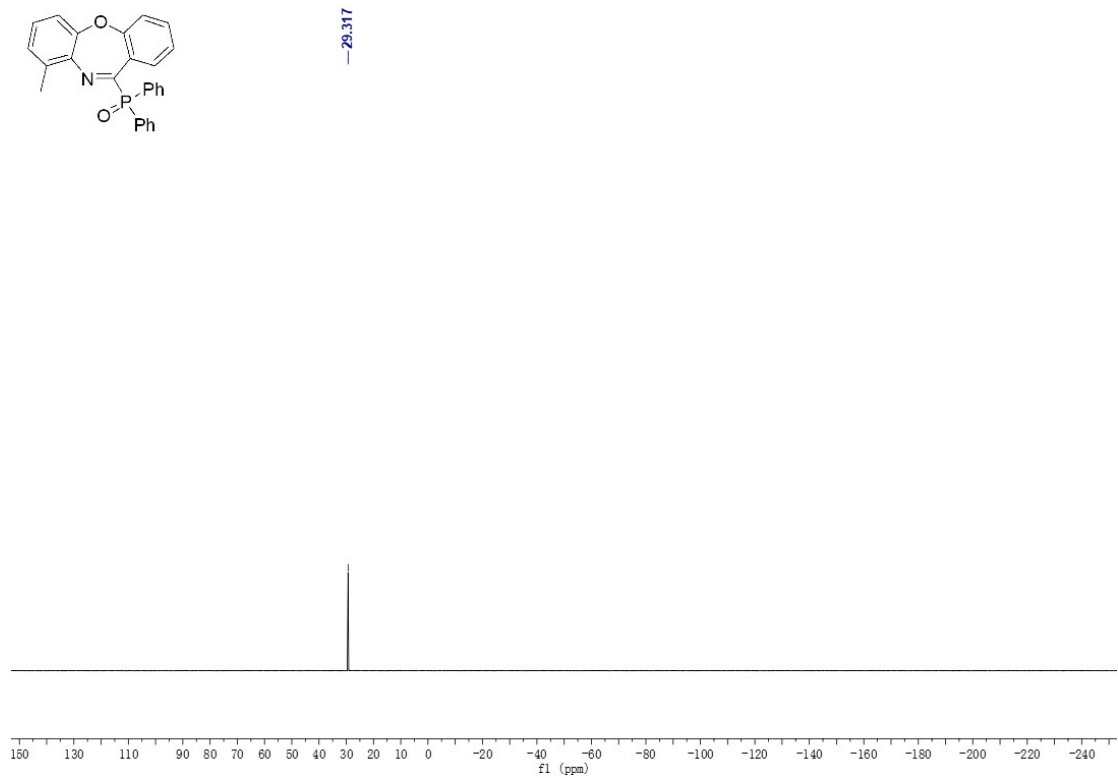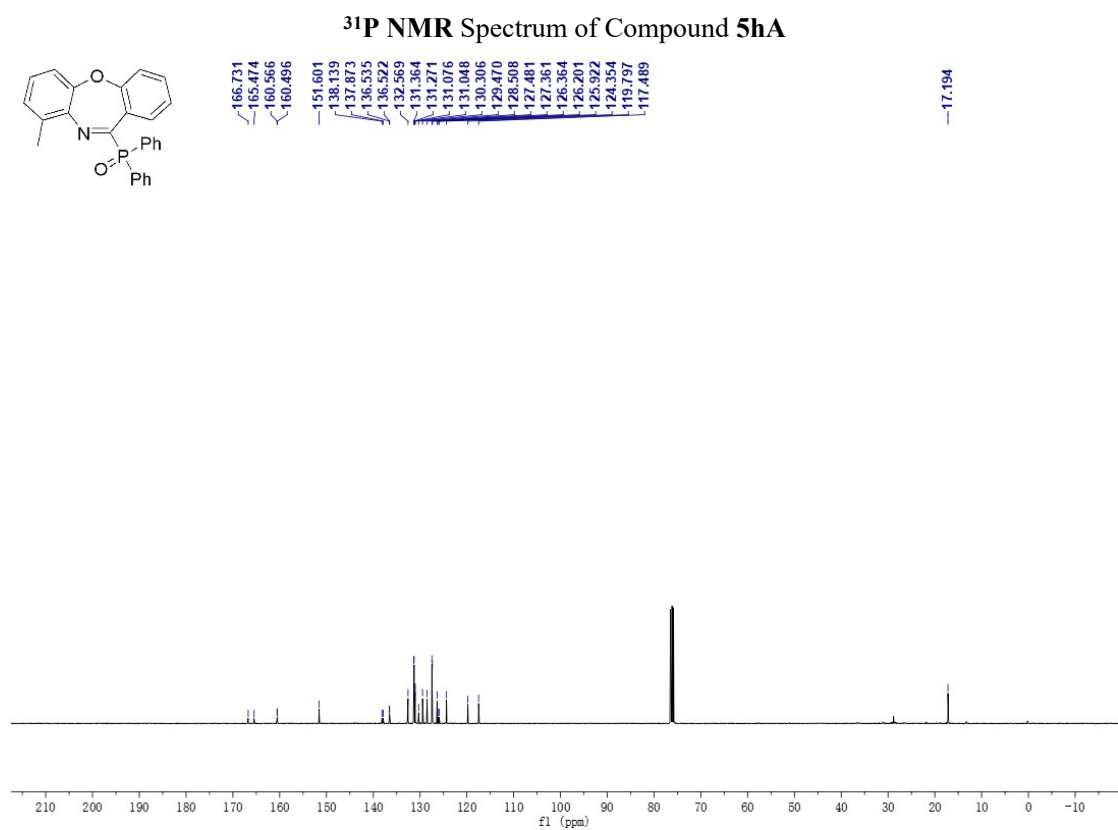

<sup>13</sup>C NMR Spectrum of Compound 5hA

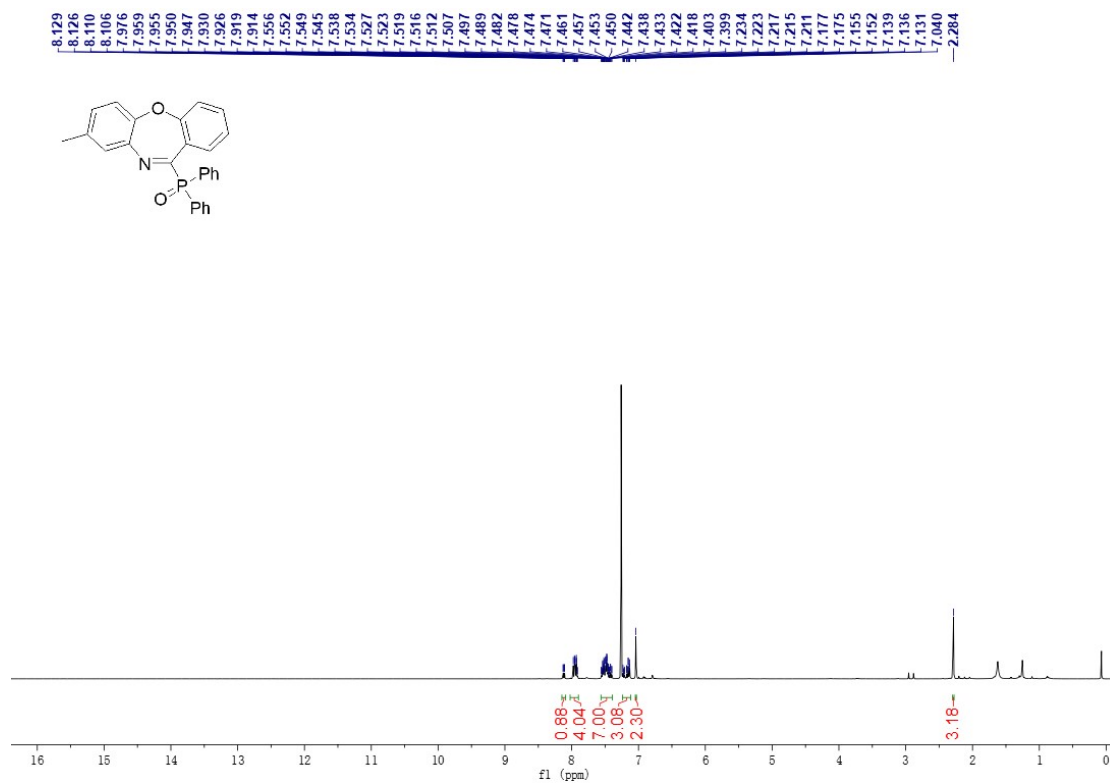

**<sup>1</sup>H NMR Spectrum of Compound 5iA**

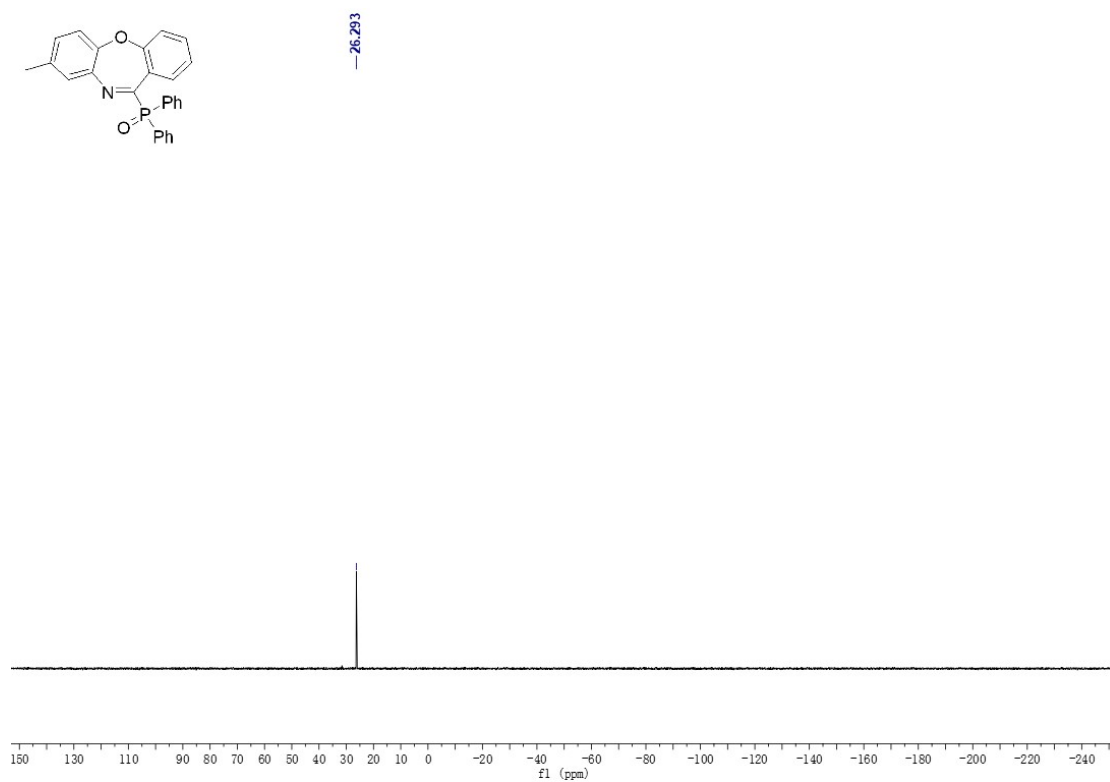

**<sup>31</sup>P NMR Spectrum of Compound 5iA**



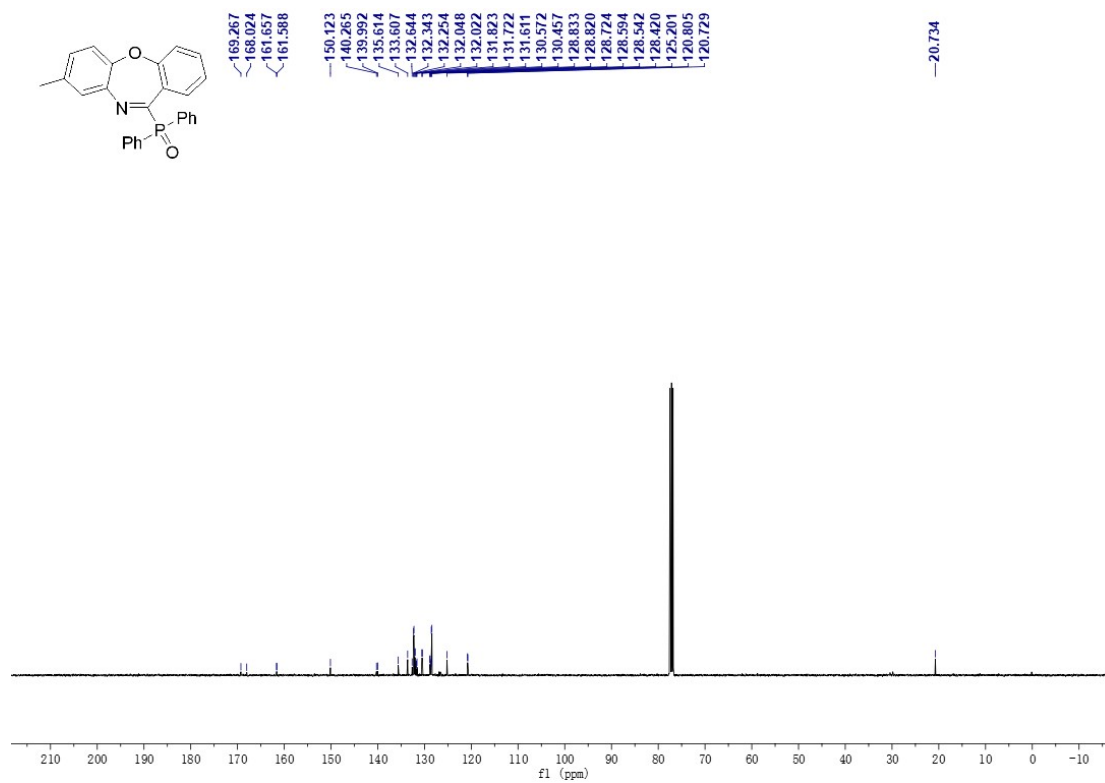

<sup>13</sup>C NMR Spectrum of Compound 5iA

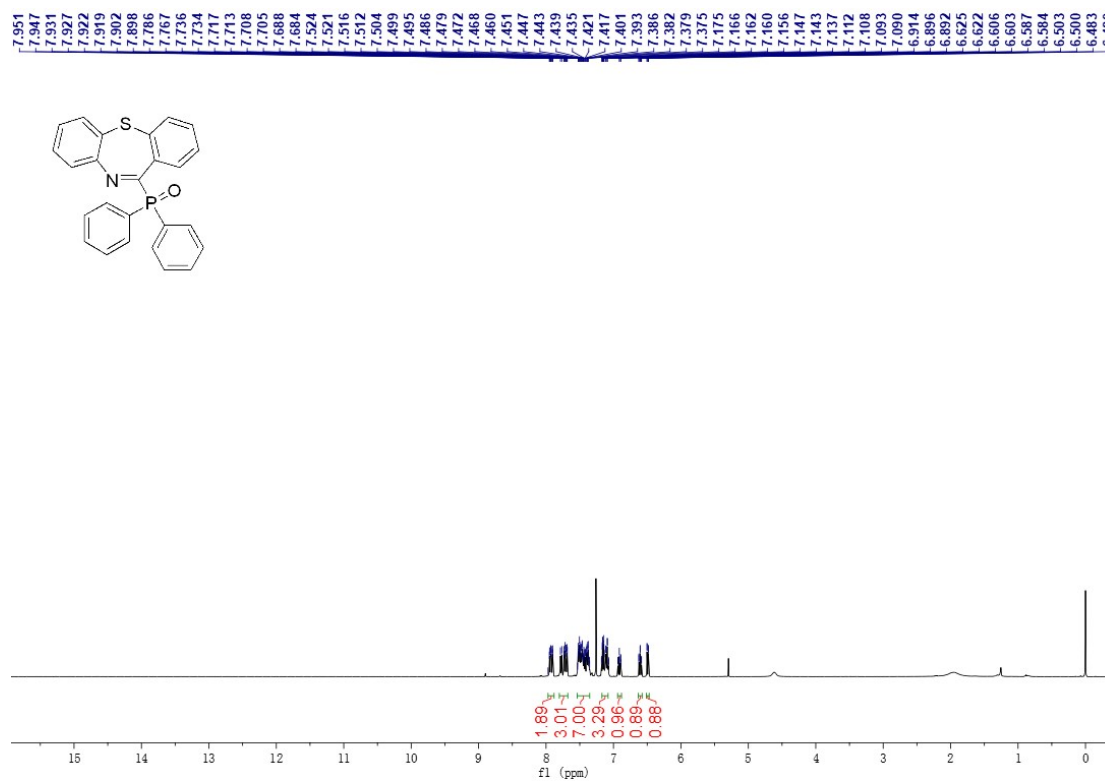

<sup>1</sup>H NMR Spectrum of Compound 5jA

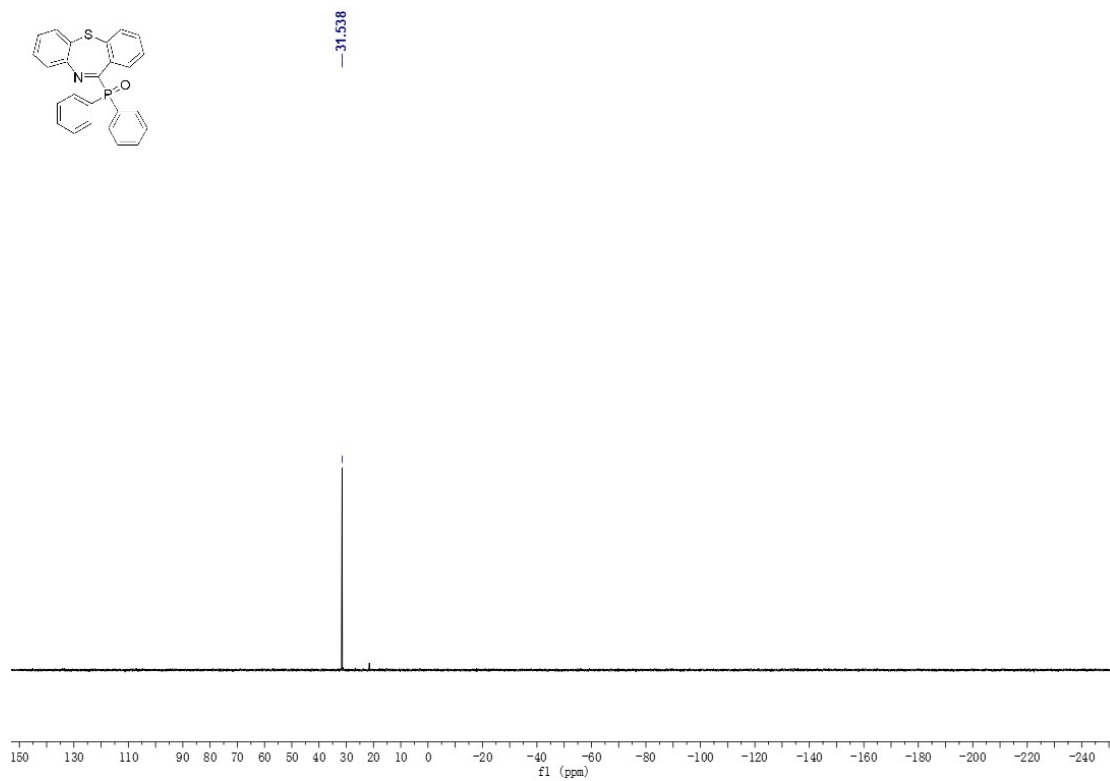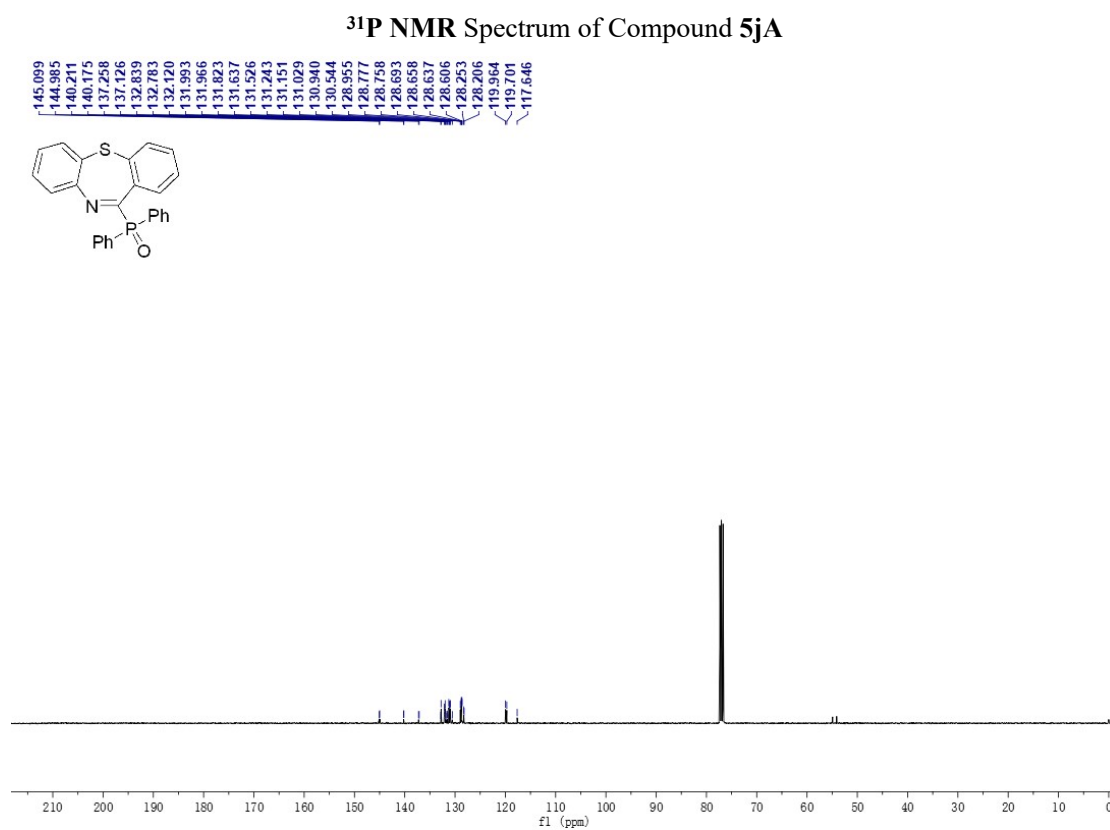

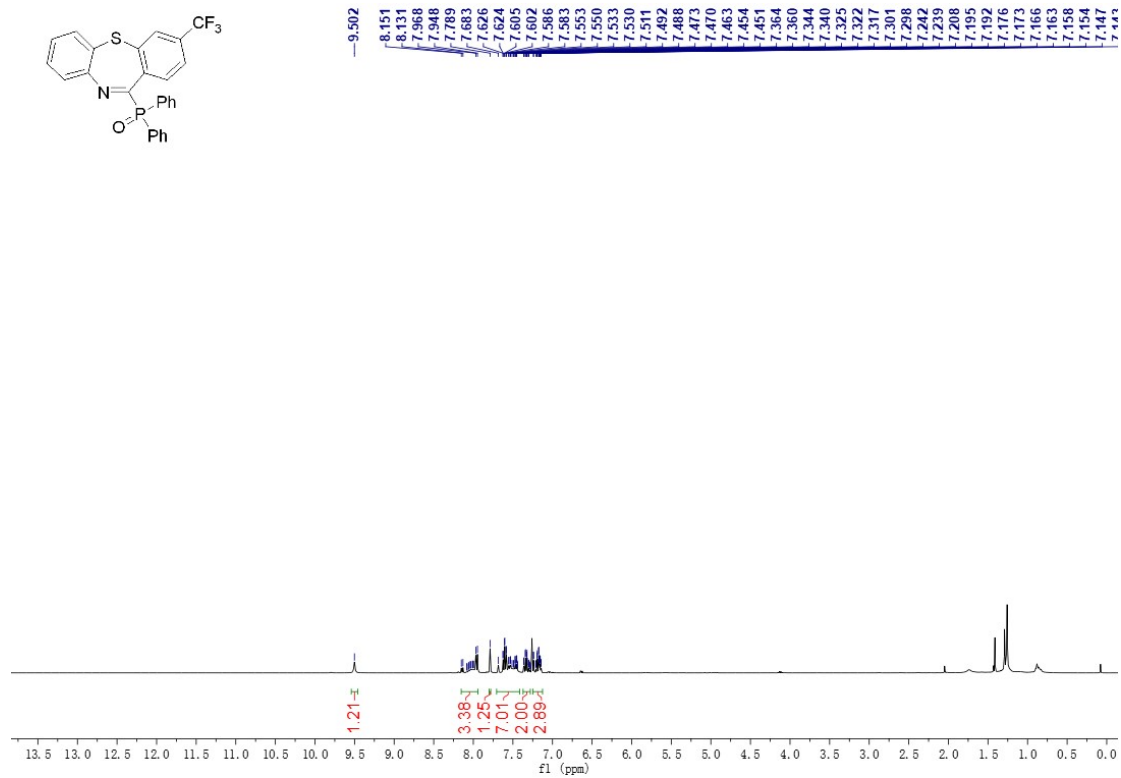

<sup>1</sup>H NMR Spectrum of Compound 5mA

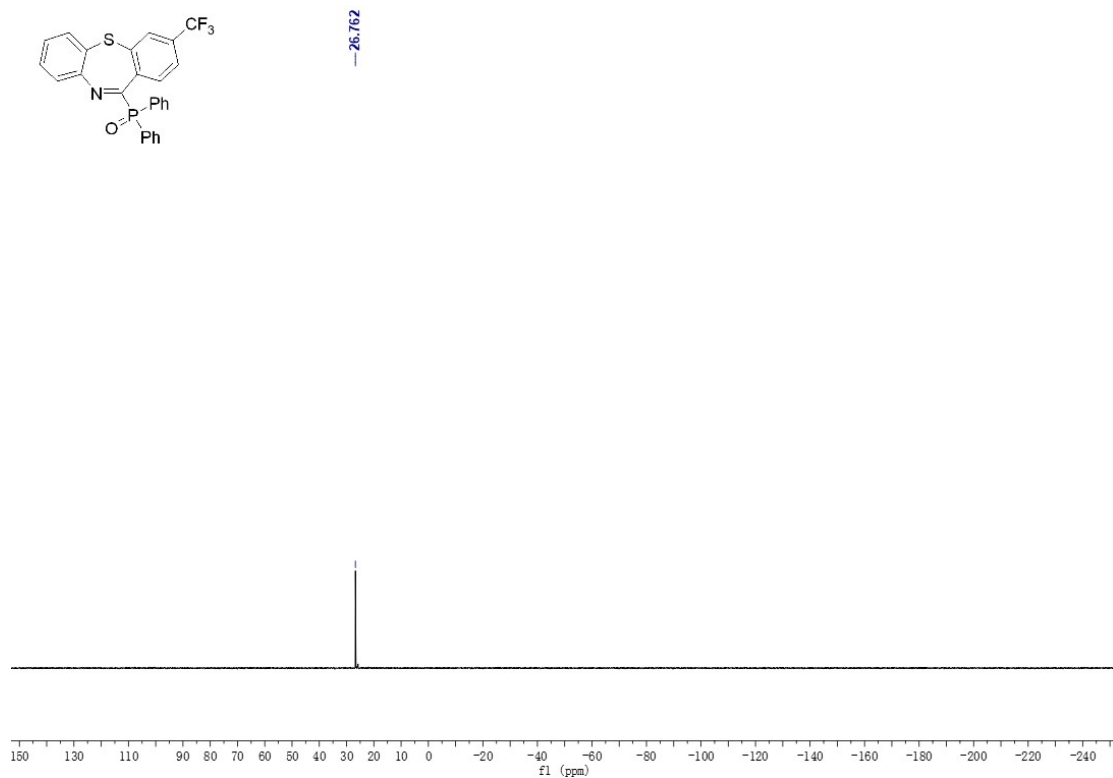

<sup>31</sup>P NMR Spectrum of Compound 5mA

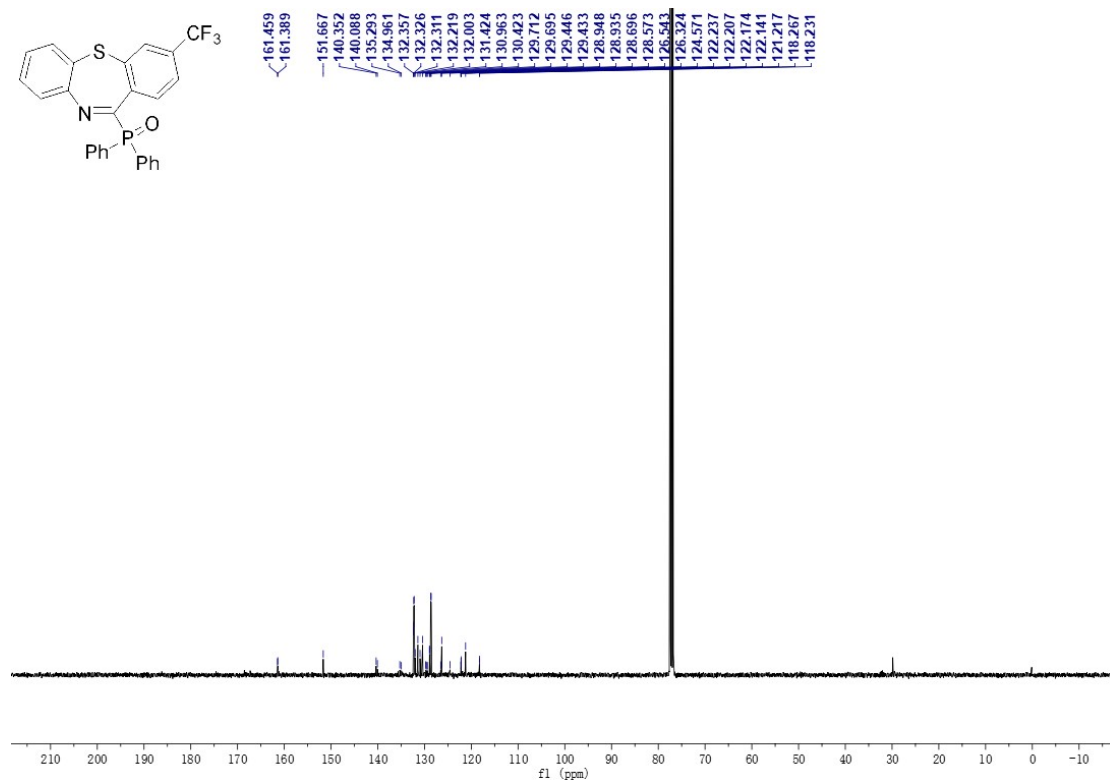

**<sup>13</sup>C NMR Spectrum of Compound 5mA**

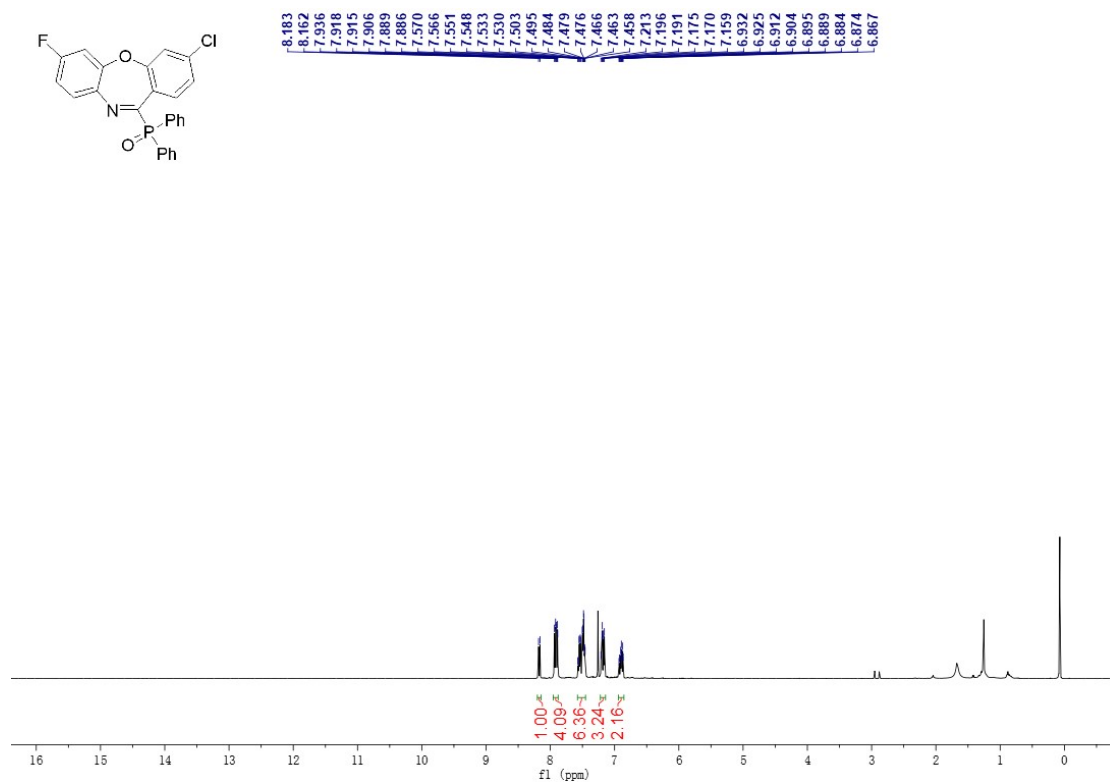

**<sup>1</sup>H NMR Spectrum of Compound 5nA**

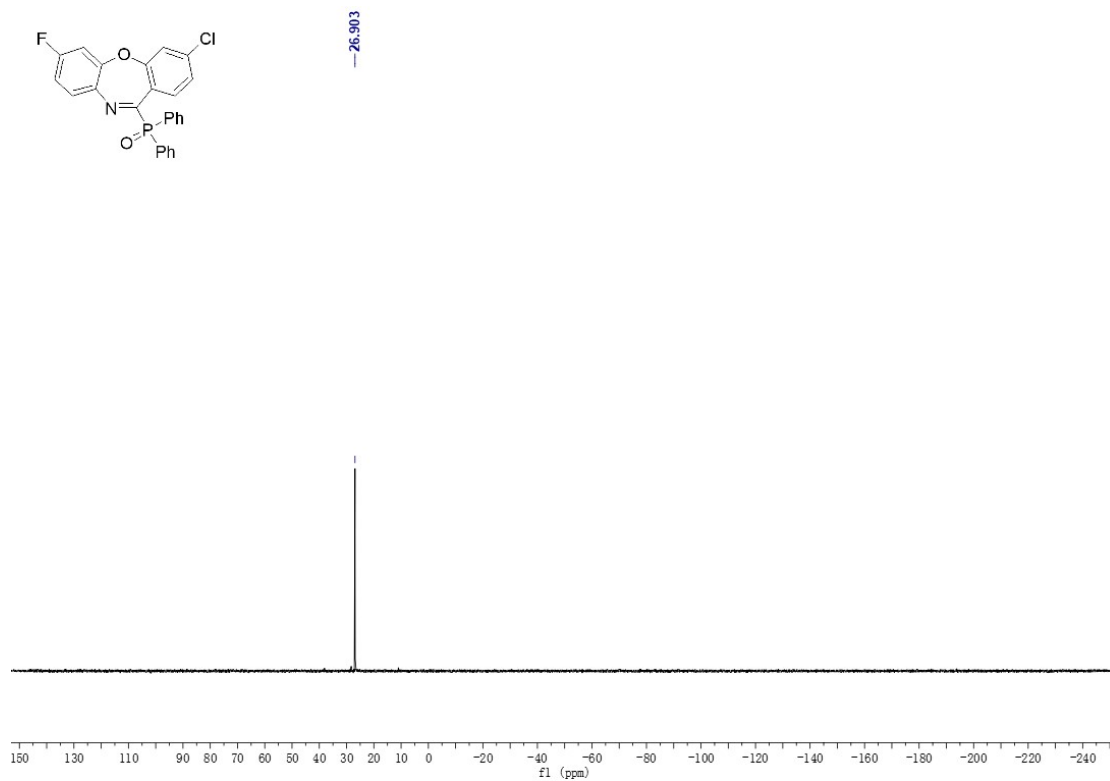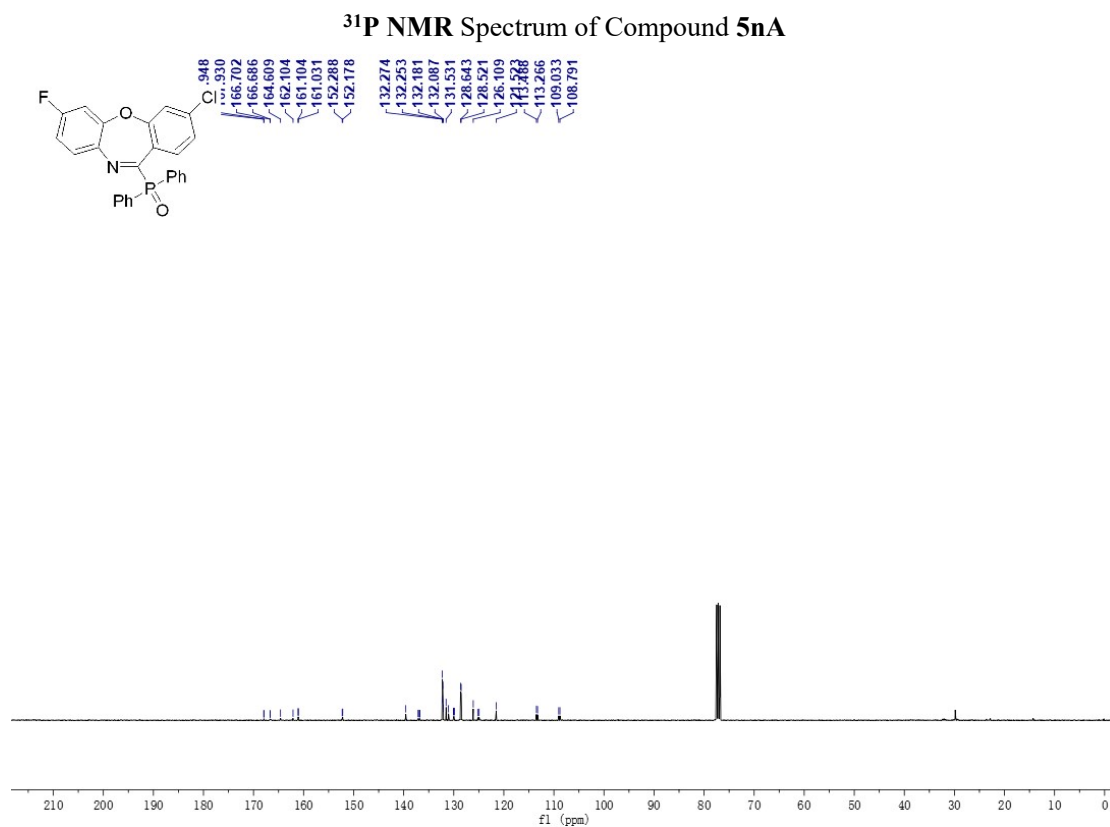

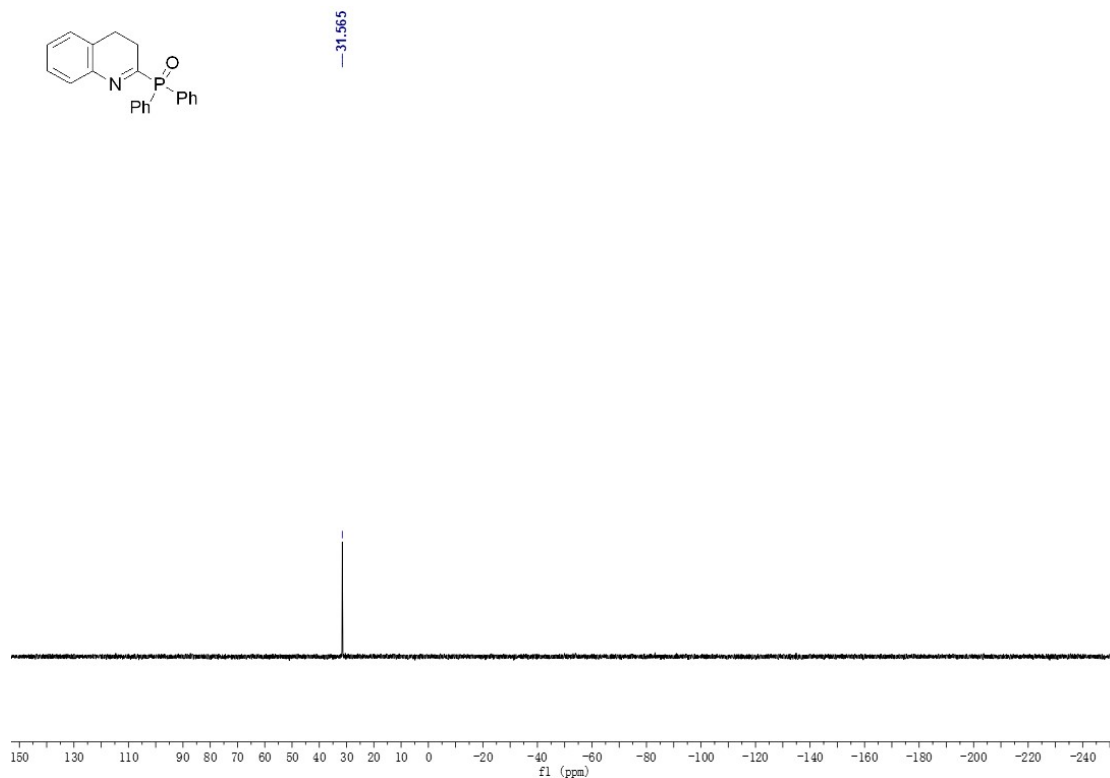

**<sup>31</sup>P NMR Spectrum of Compound 5pA**

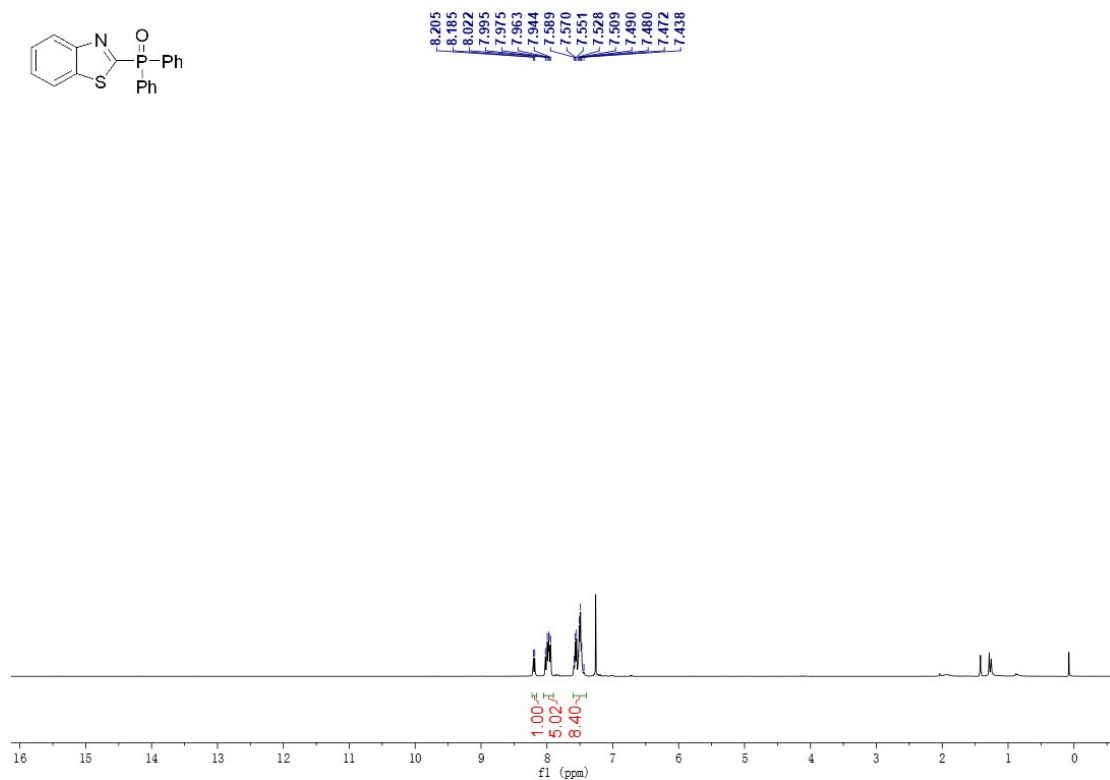

**<sup>1</sup>H NMR Spectrum of Compound 5qA**

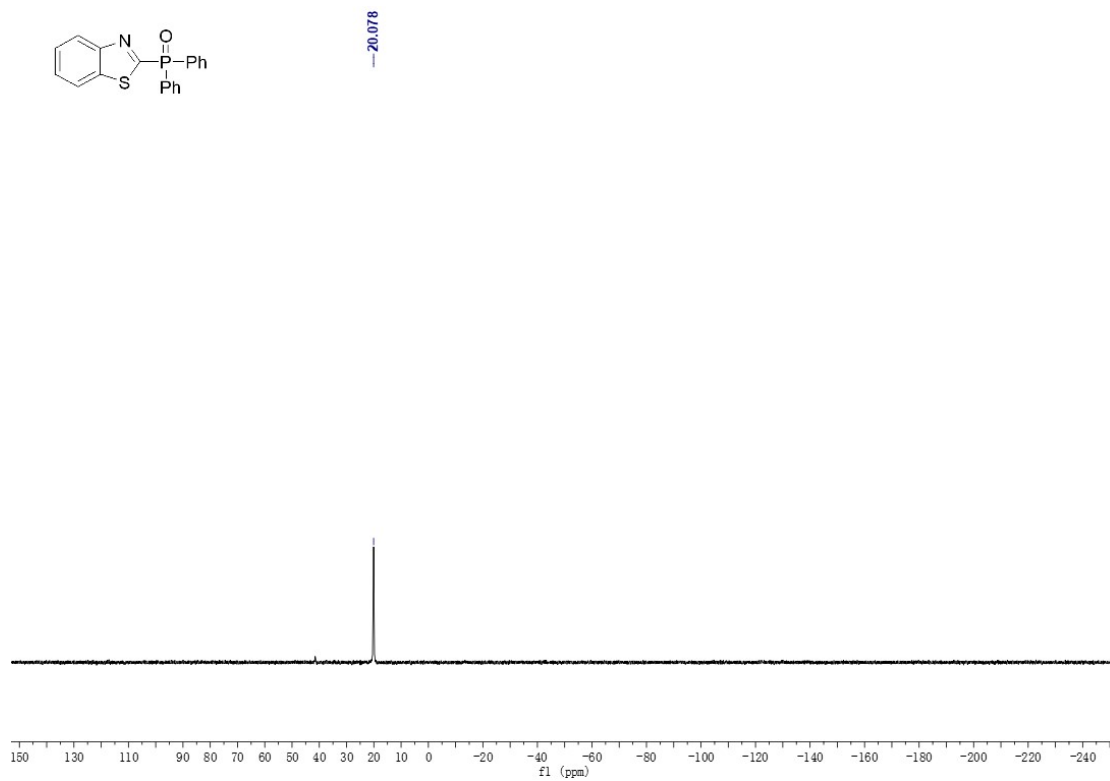

**<sup>31</sup>P NMR Spectrum of Compound 5qA**

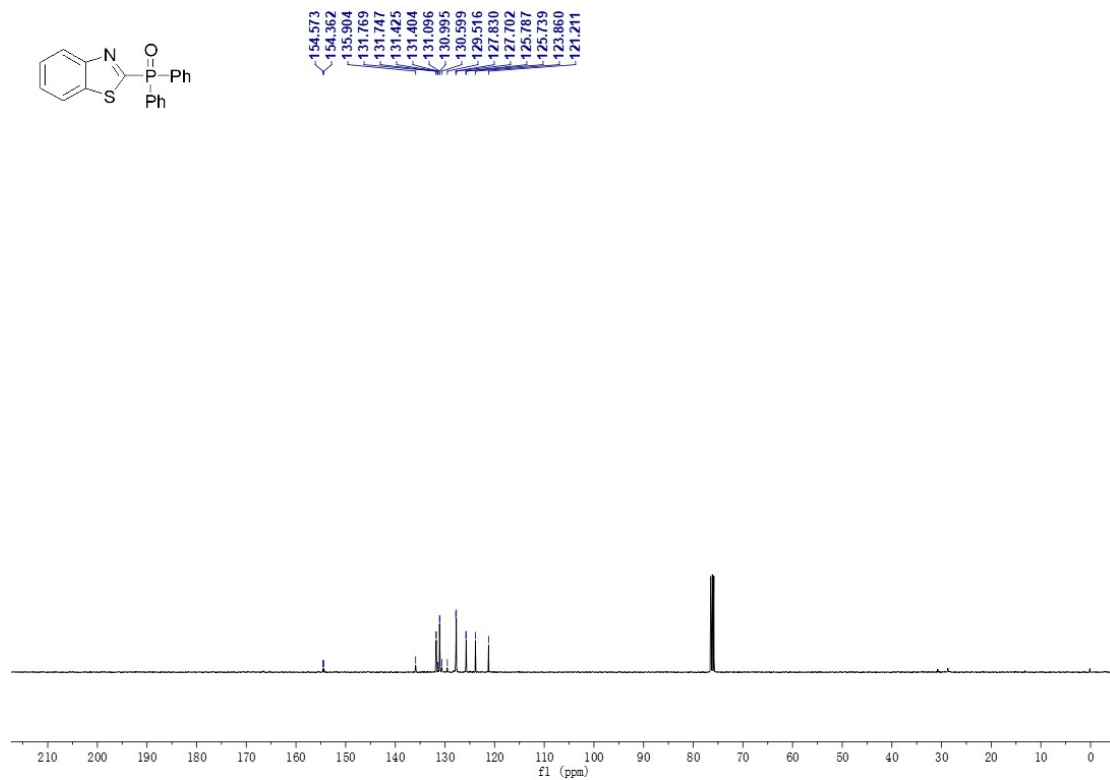

**<sup>13</sup>C NMR Spectrum of Compound 5qA**

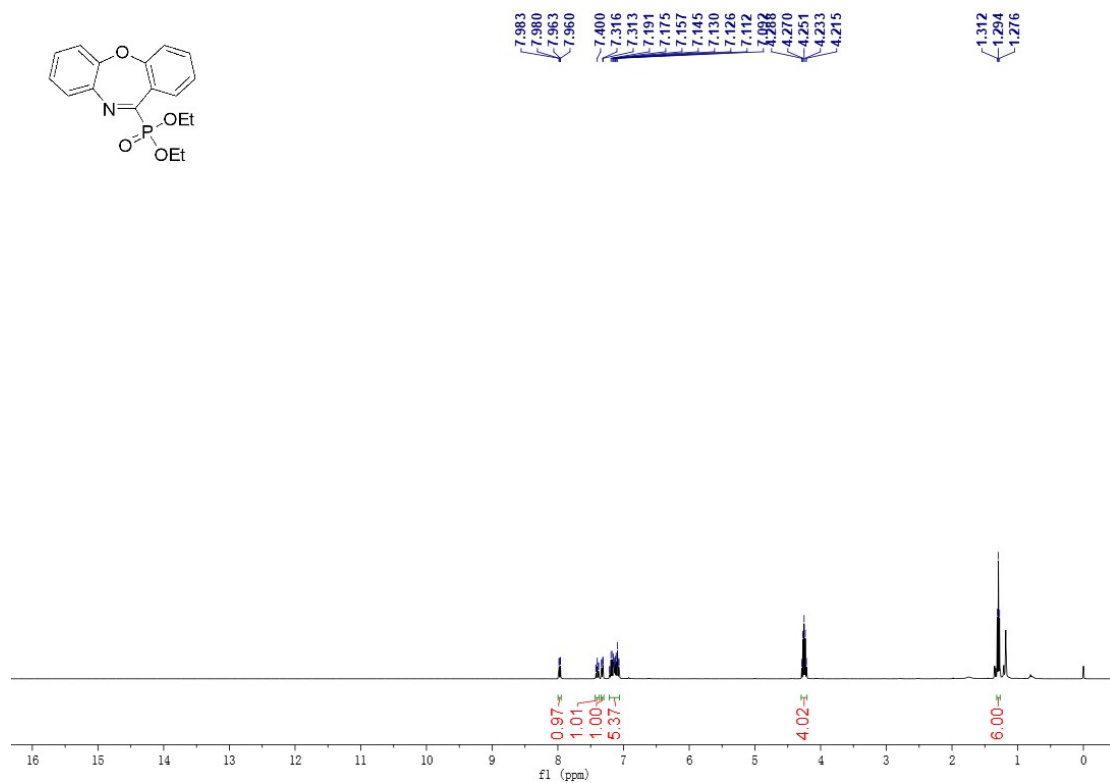

**<sup>1</sup>H NMR Spectrum of Compound 5aB**

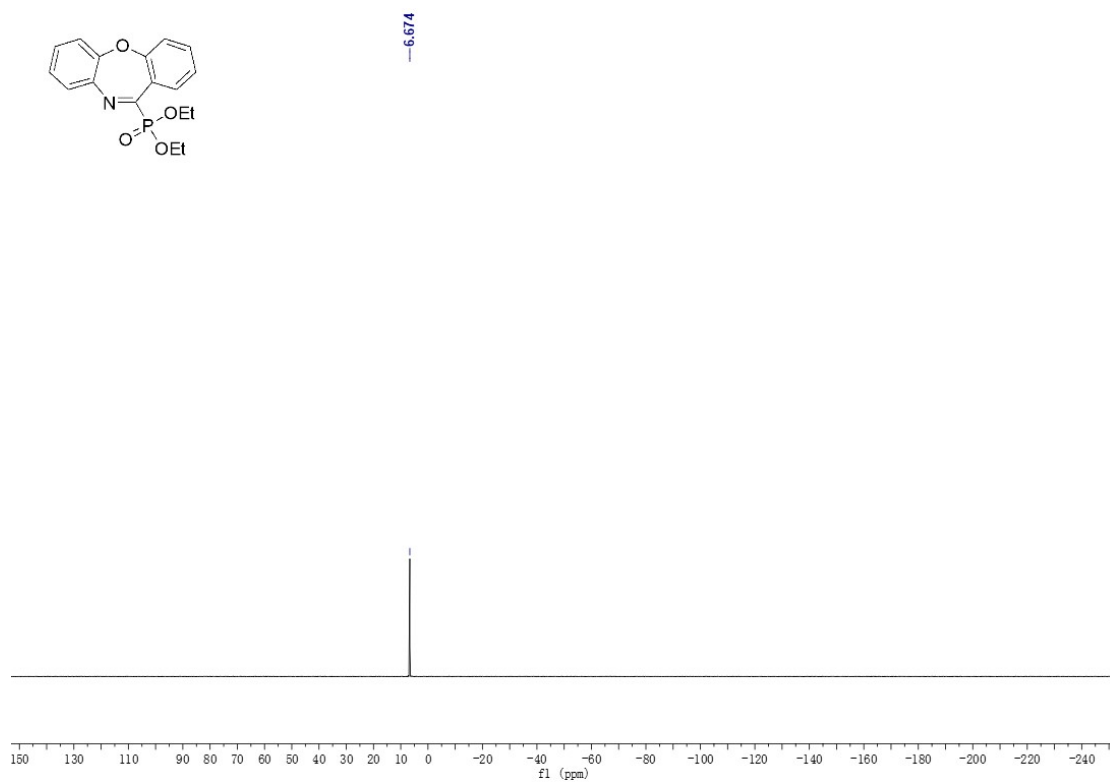

**<sup>31</sup>P NMR Spectrum of Compound 5aB**



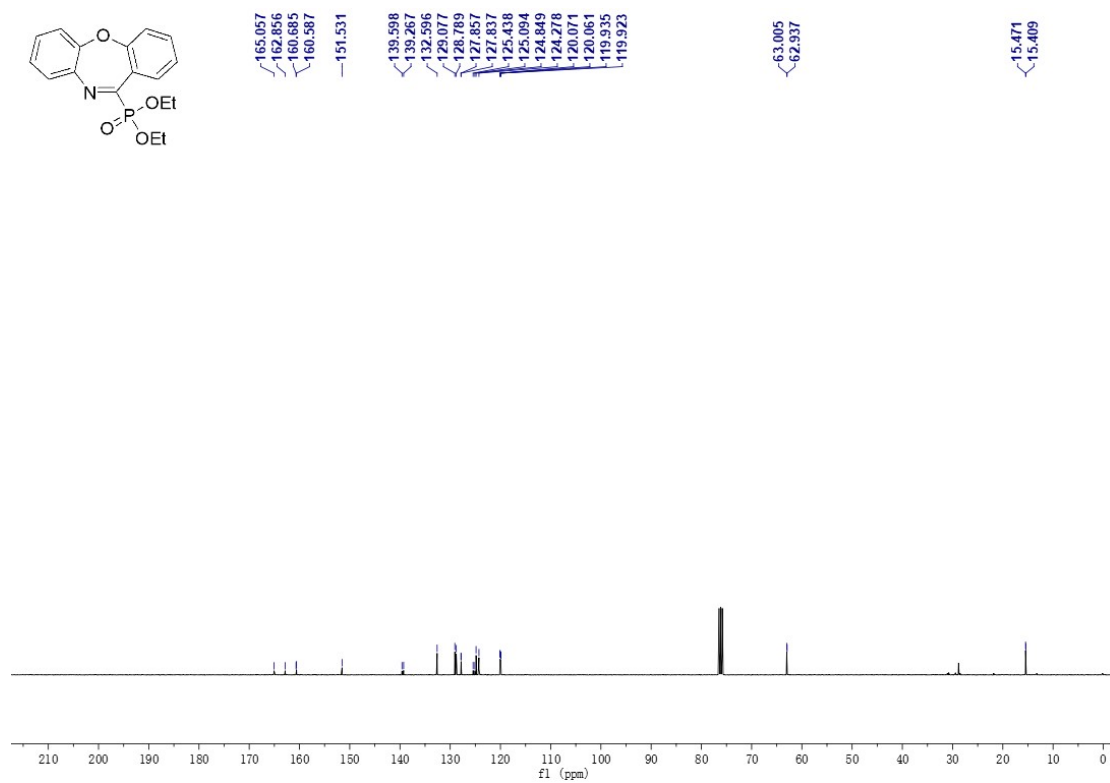

**<sup>13</sup>C NMR Spectrum of Compound 5aB**

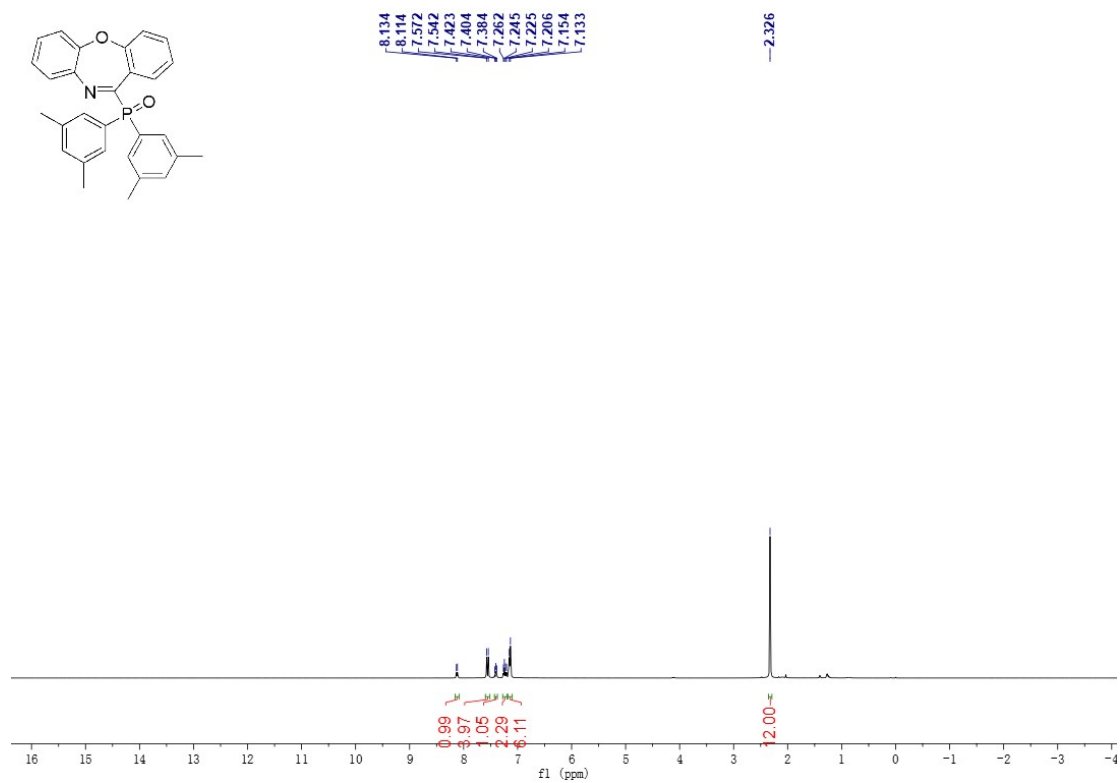

**<sup>1</sup>H NMR Spectrum of Compound 5aC**

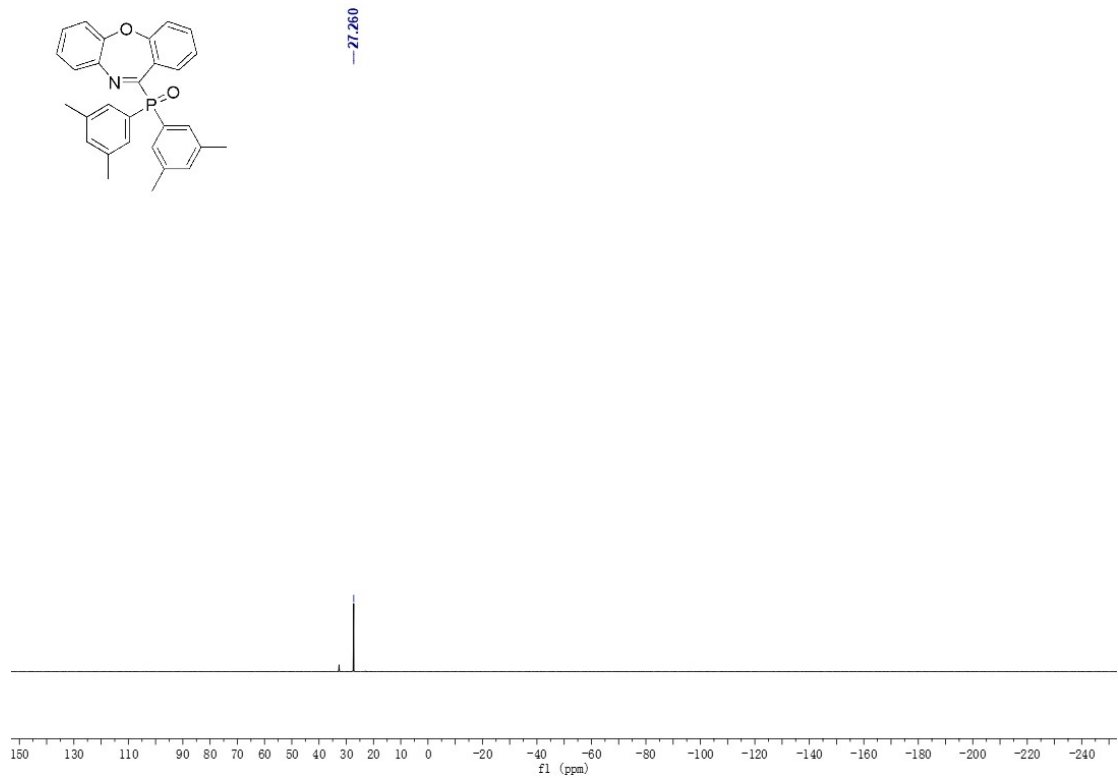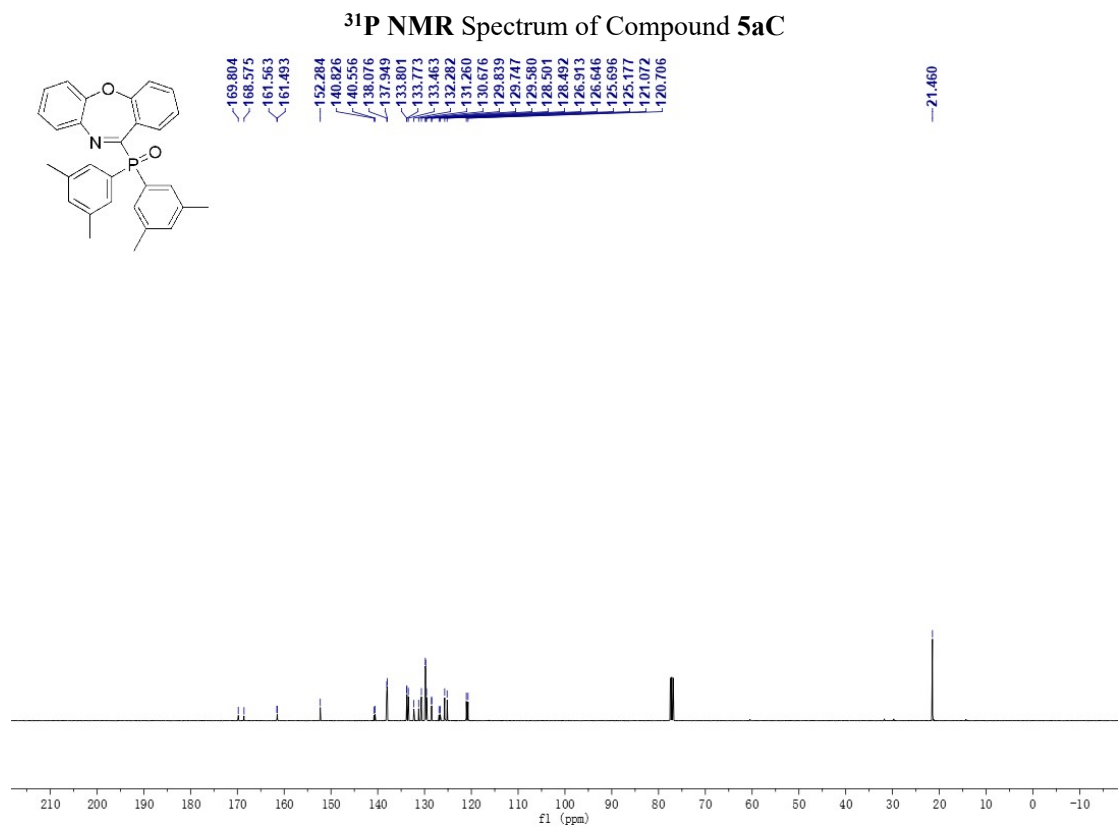

**<sup>13</sup>C NMR Spectrum of Compound 5aC**

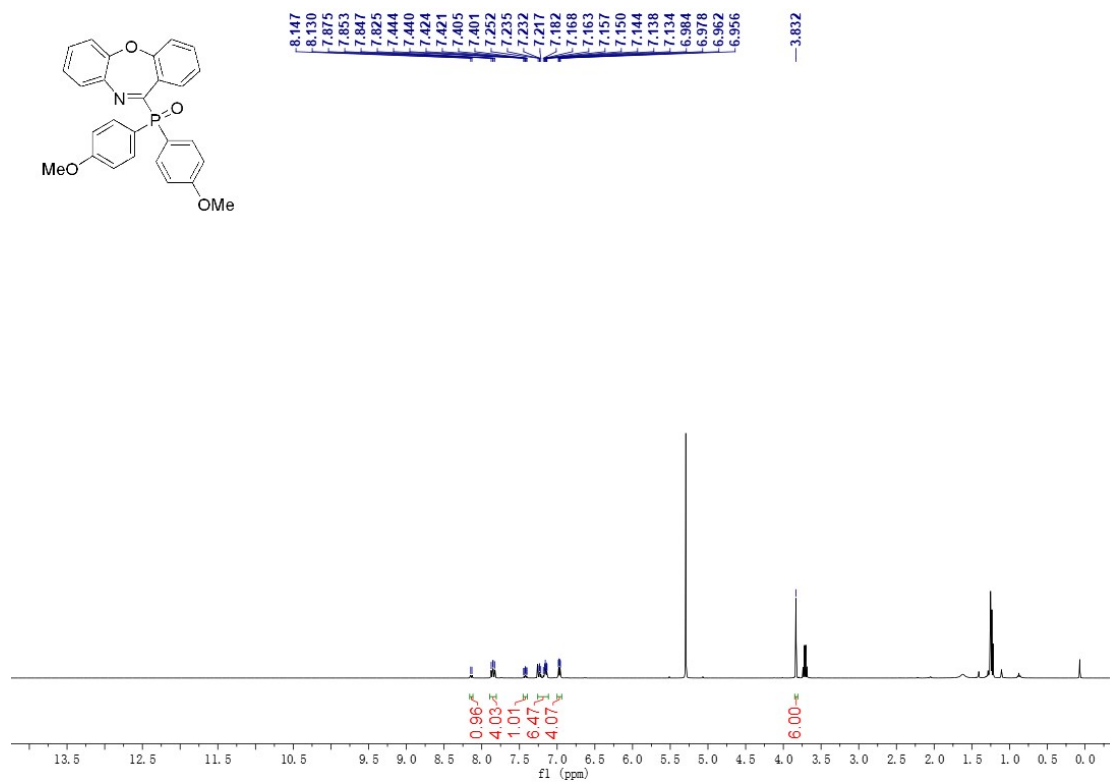

**<sup>1</sup>H NMR Spectrum of Compound 5aD**

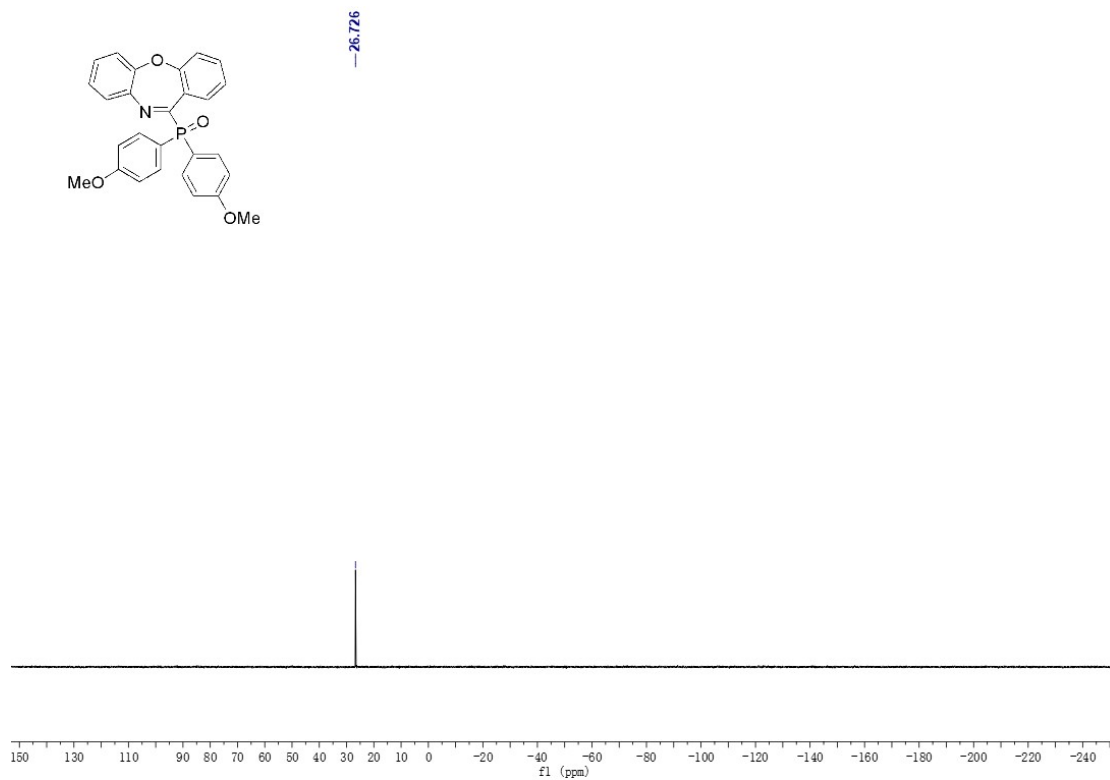

**<sup>31</sup>P NMR Spectrum of Compound 5aD**

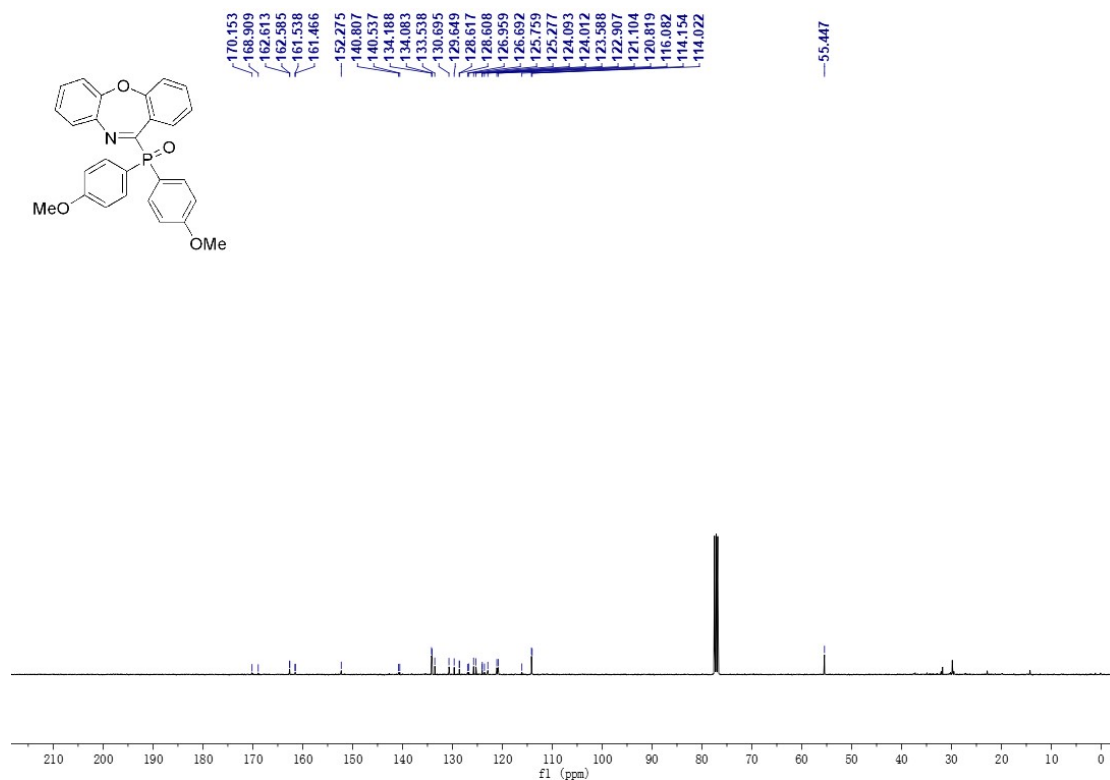

<sup>13</sup>C NMR Spectrum of Compound 5aD

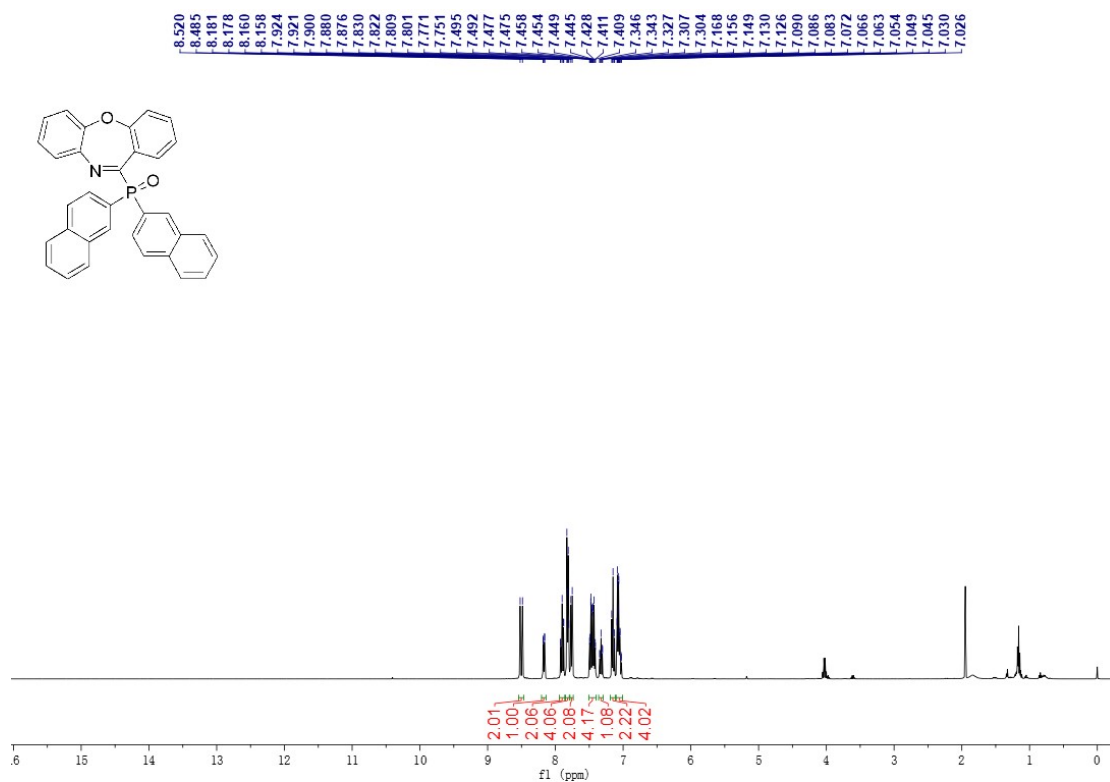

<sup>1</sup>H NMR Spectrum of Compound 5aE

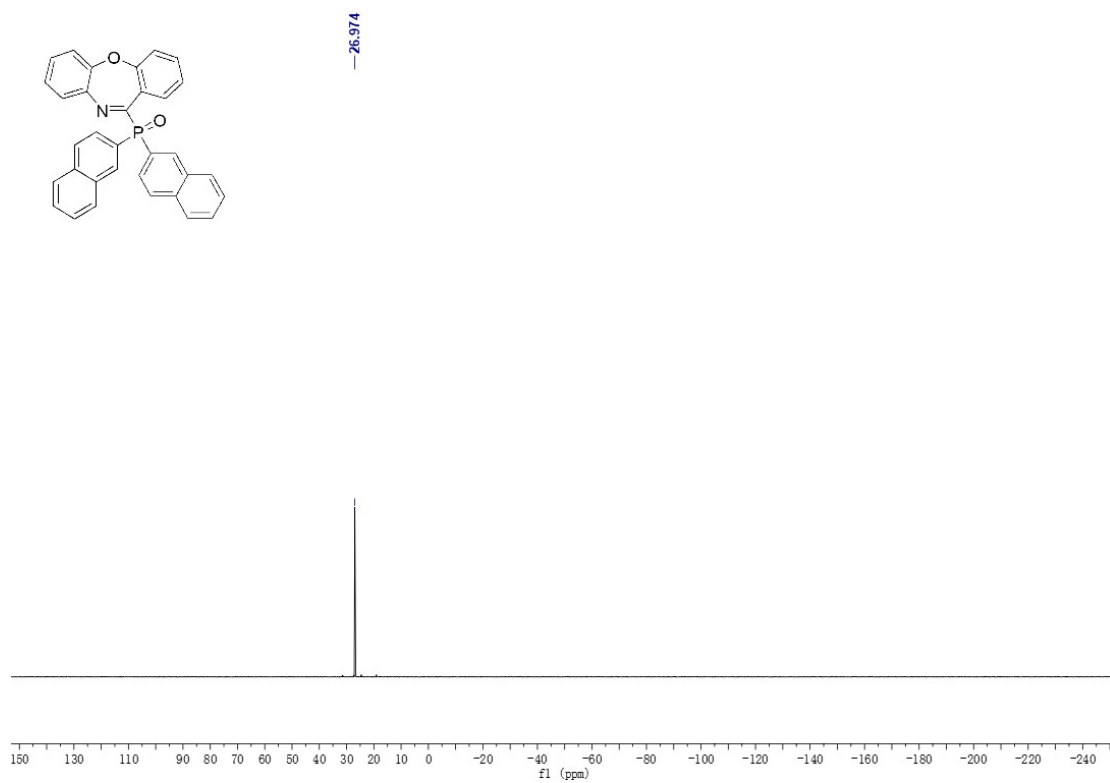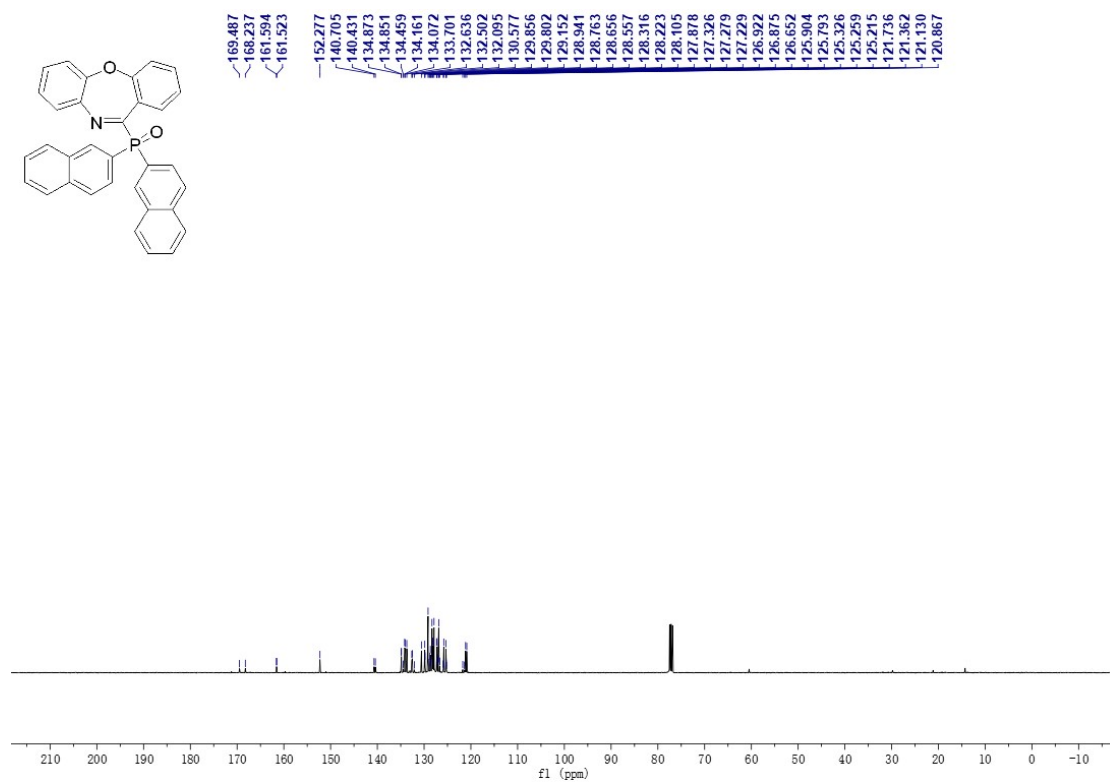

### <sup>13</sup>C NMR Spectrum of Compound 5aE

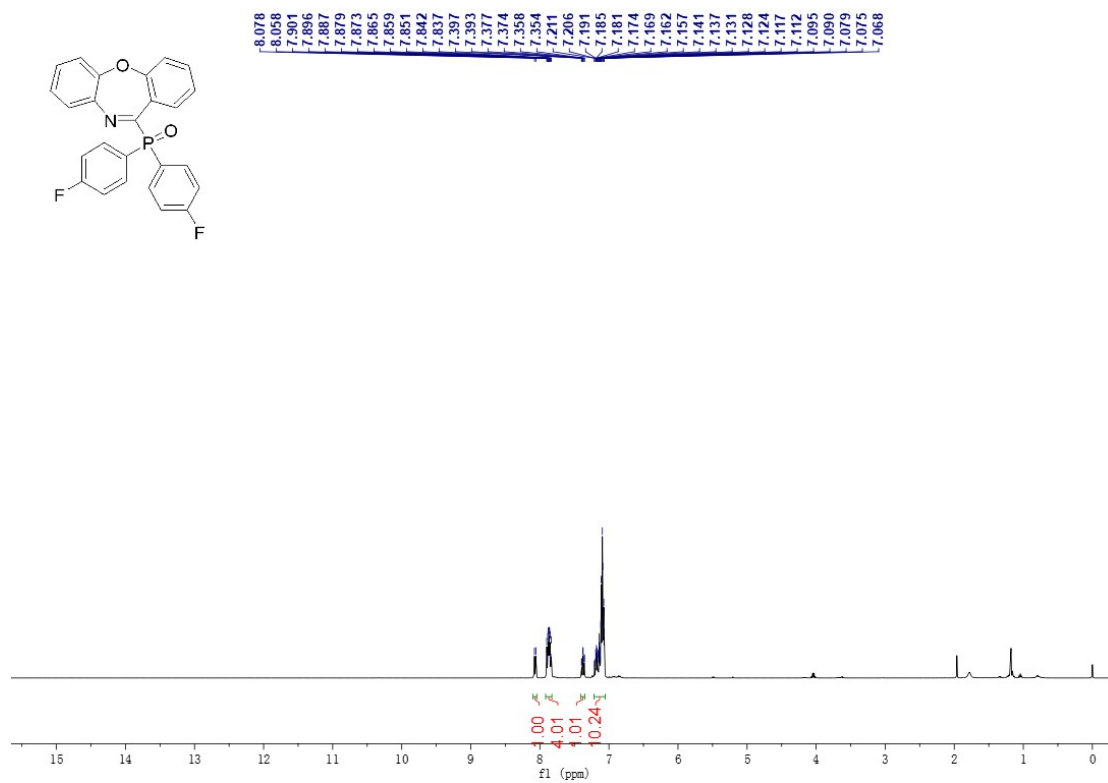

### <sup>1</sup>H NMR Spectrum of Compound 5aF

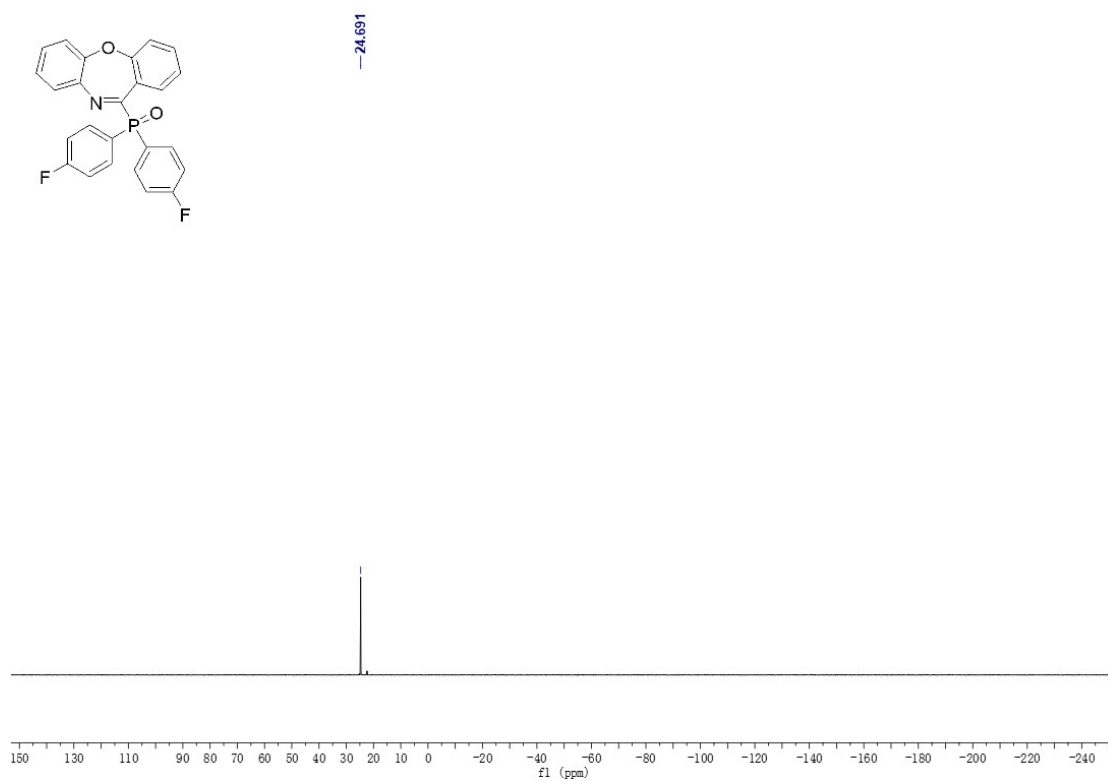

### <sup>31</sup>P NMR Spectrum of Compound 5aF

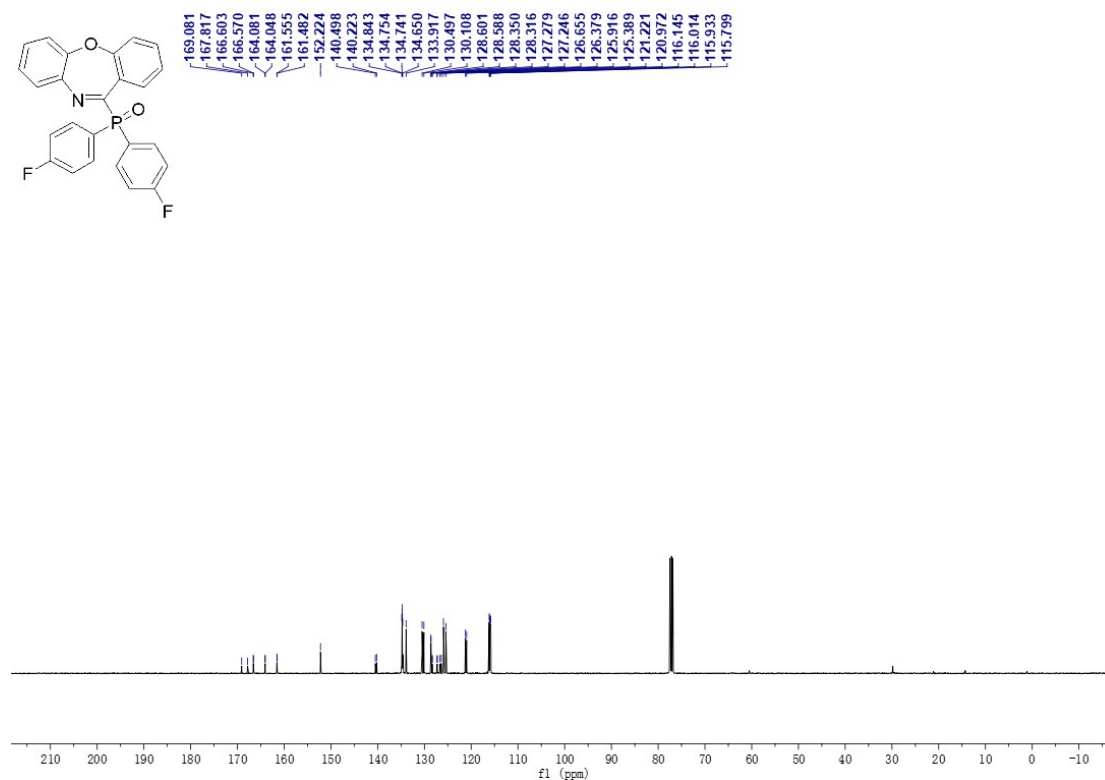

**<sup>13</sup>C NMR Spectrum of Compound 5aF**

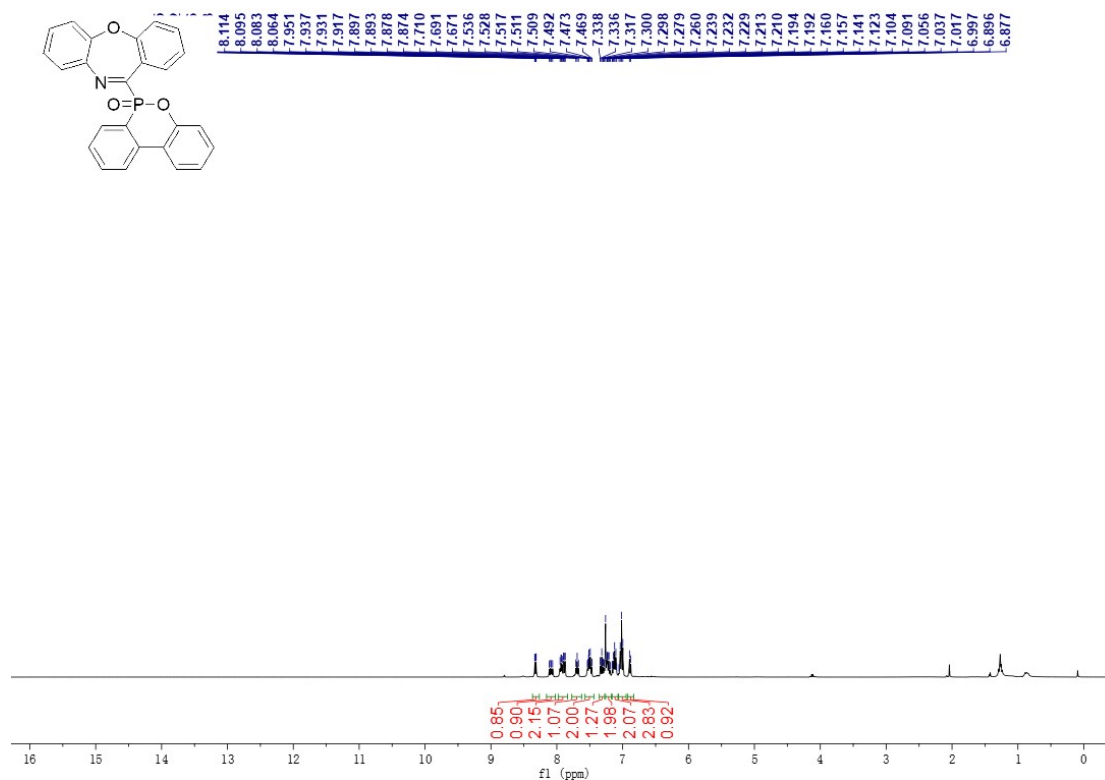

**<sup>1</sup>H NMR Spectrum of Compound 5aG**

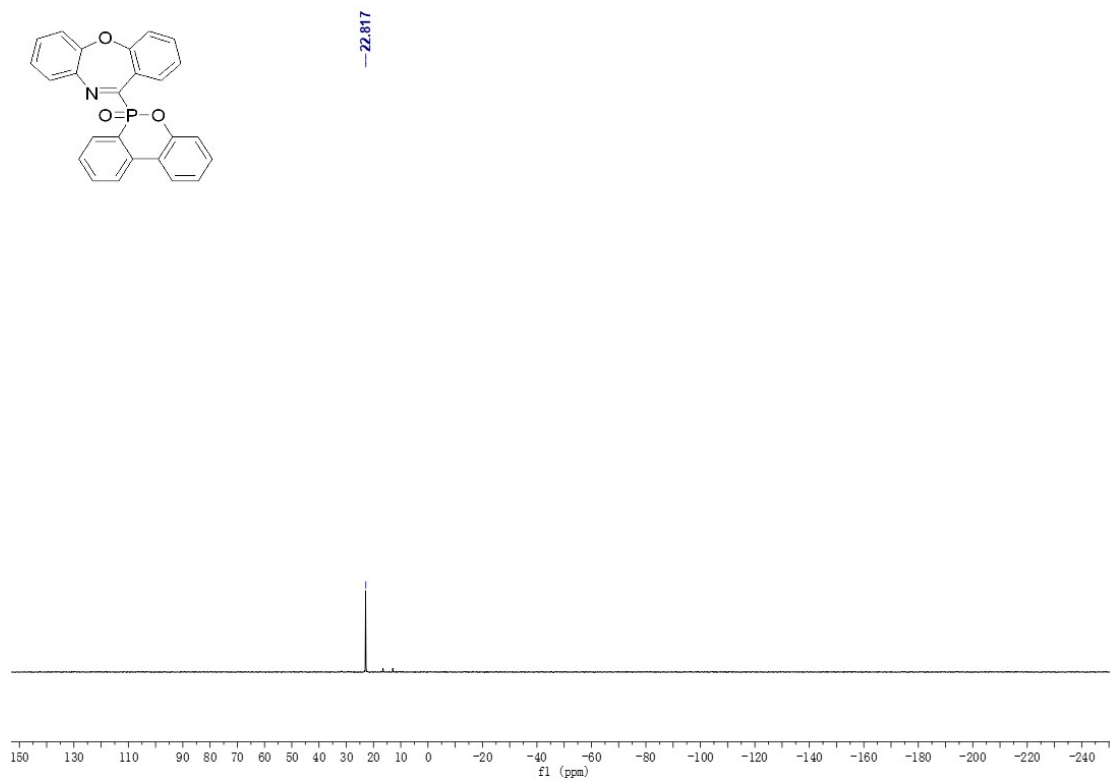

**<sup>31</sup>P NMR Spectrum of Compound 5aG**

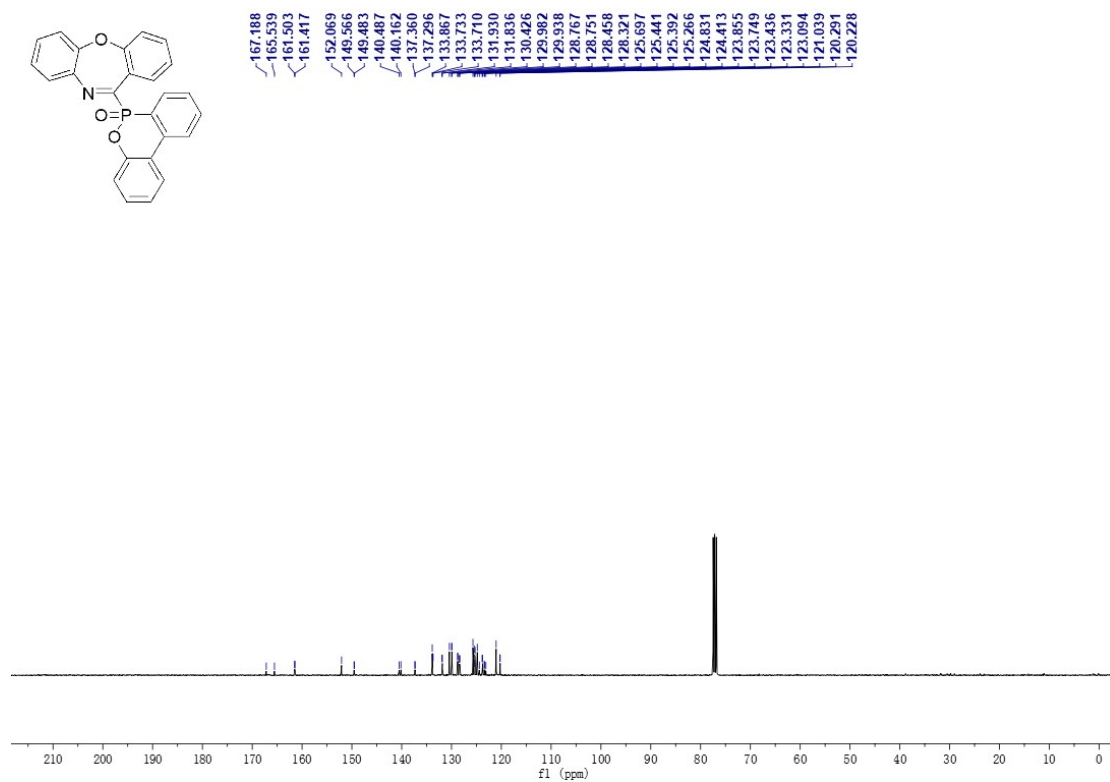

**<sup>13</sup>C NMR Spectrum of Compound 5aG**



Copies of  $^1\text{H}$  (400 MHz) in  $\text{CDCl}_3$  of the light on-off experiments

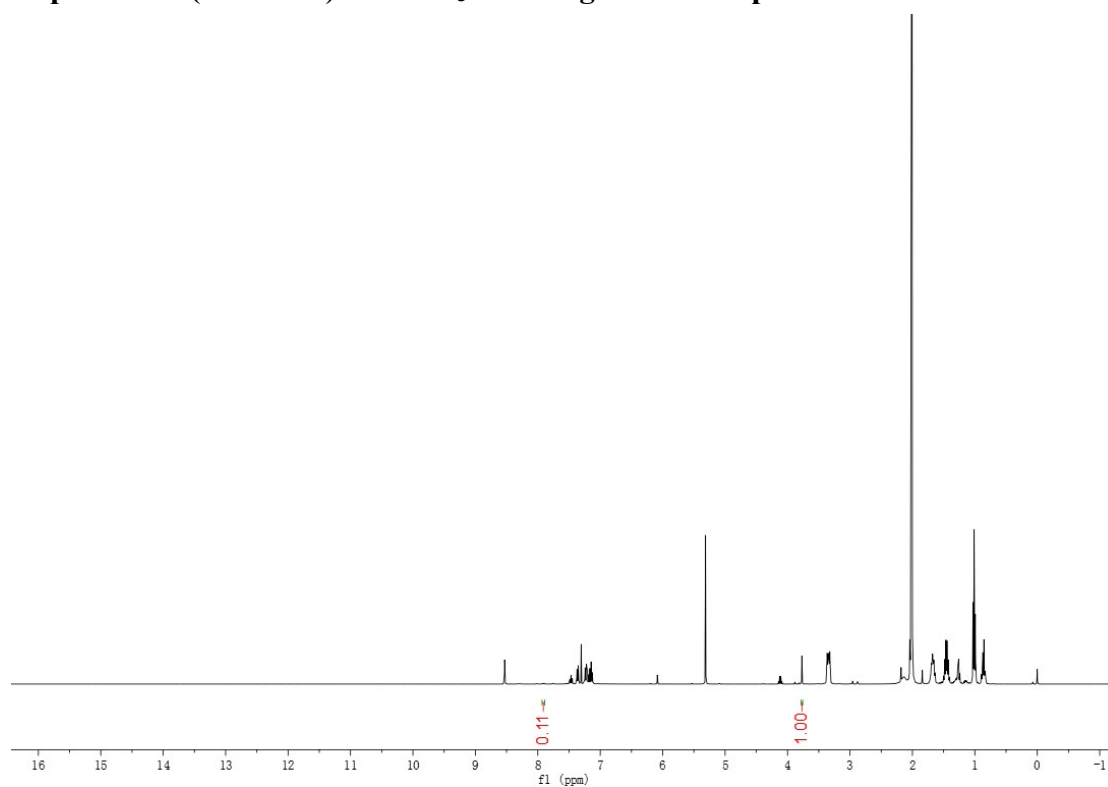

$^1\text{H}$  NMR Spectrum of 3h

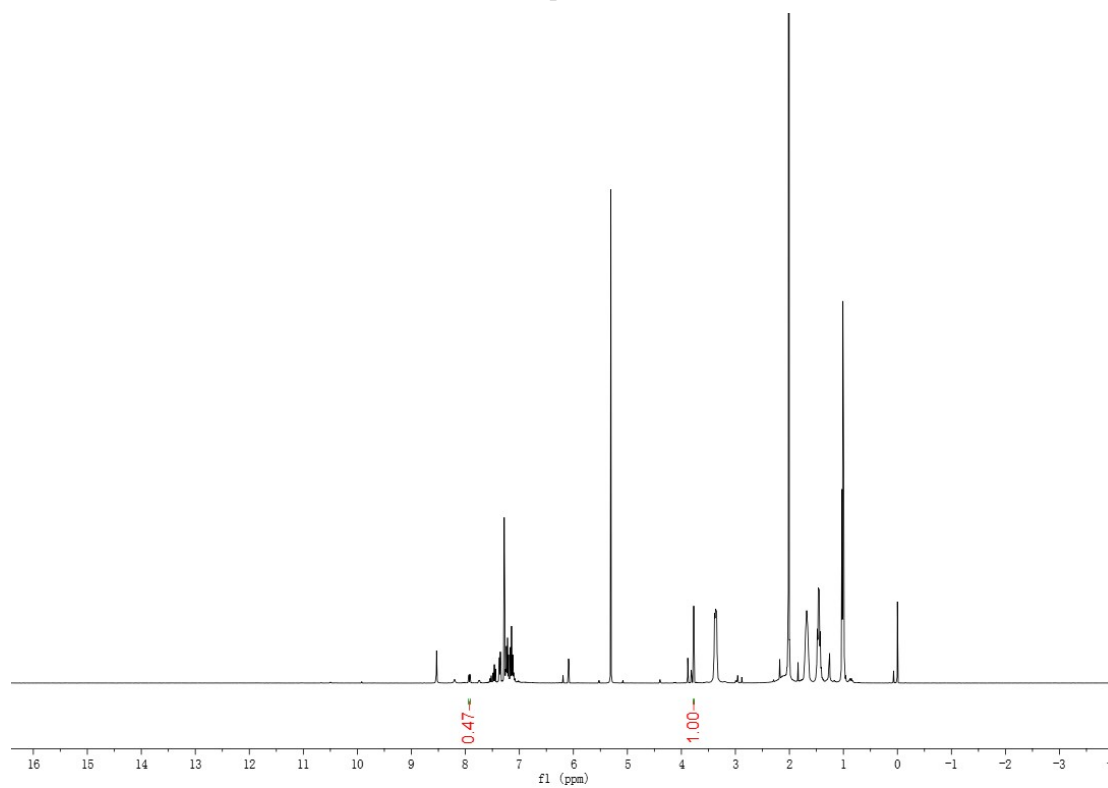

$^1\text{H}$  NMR Spectrum of 6h

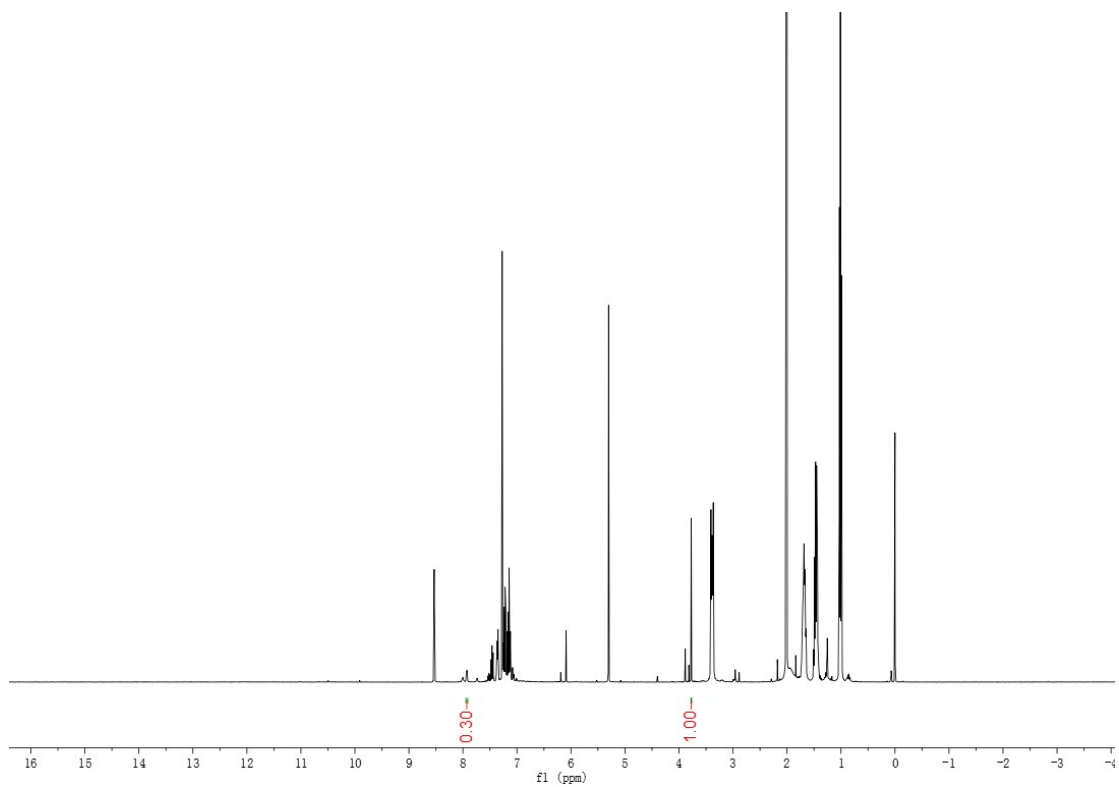

**<sup>1</sup>H NMR Spectrum of 9h**

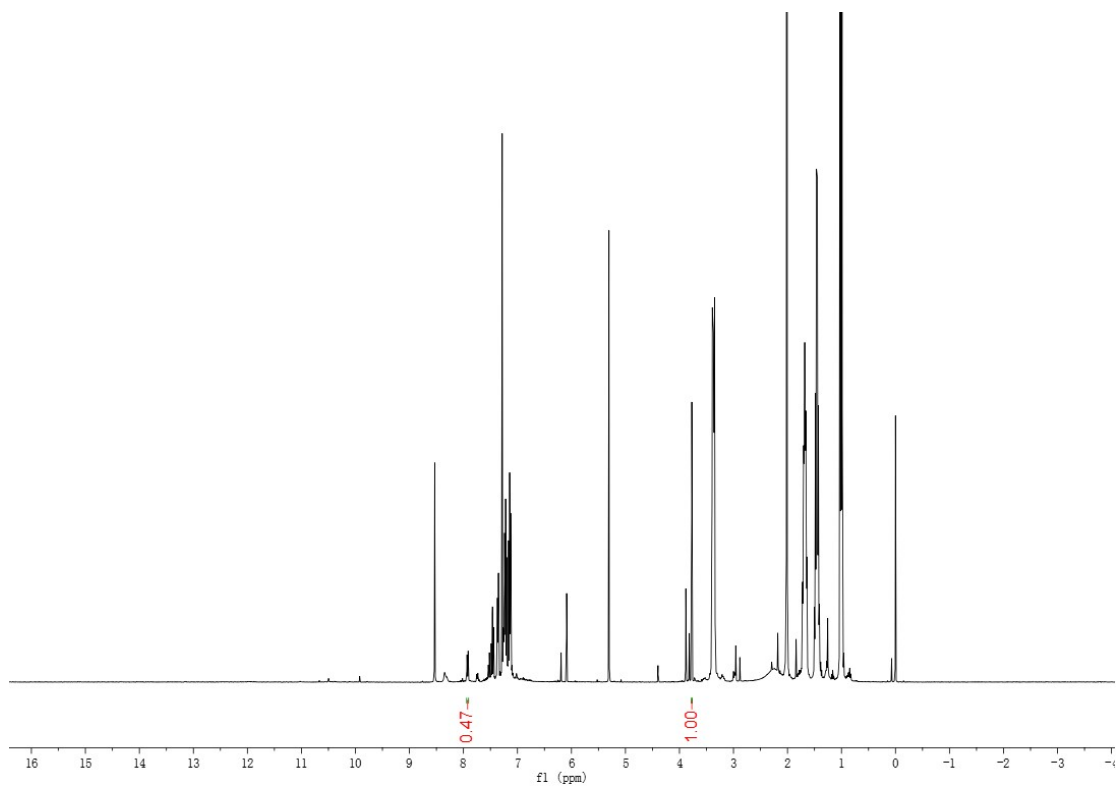

**<sup>1</sup>H NMR Spectrum of 12h**

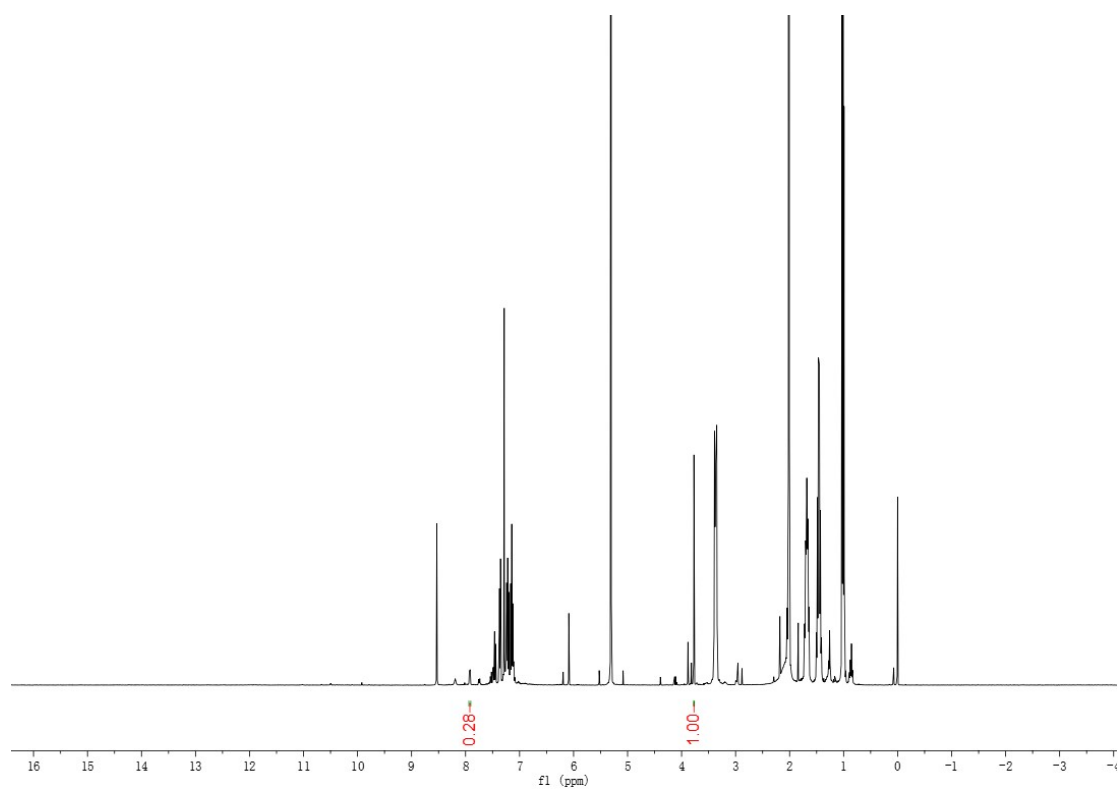

<sup>1</sup>H NMR Spectrum of 24h
